# Supplementary material for: A Biomarker Panel of Radiation-Upregulated miRNA as Signature for Ionizing Radiation Exposure
Source: MDPI journal article supplement (doi:10.3390/life10120361), 2020-12-18
Supplement: s1 [file s1]

**Table S6** Radiation-upregulated miRNAs in current study as well as previous reports

| miRNA   | Cell line | Dose(Gy) | Collection time | Method      | Expression      | Ref  |
|---------|-----------|----------|-----------------|-------------|-----------------|------|
| let-7e  | TK6       | 2Gy      | 0.5,4,8,12,24h  | qRT-PCR     | ↑ at 4h         | [1]  |
|         | AG1522    | 10Gy     | 1h              | microarrays | ↑ at 1h         | [2]  |
|         | M059K     | 3Gy      | 4, 8, 12, 24h   | qRT-PCR     | ↑ at 4,8,12,24h | [3]  |
| let-7g  | HDMEC     | 2Gy      | 6h              | microarrays | ↑ at 6h         | [4]  |
|         | U87MG     | 18.8Gy   | 4h              | microarrays | ↑ at 4h         | [5]  |
|         | blood     | 1.25 Gy  | 4h              | qRT-PCR     | ↑ at 4h         | [6]  |
| miR-21  | HaCaT     | 1        | 1h,3h           | qRT-PCR     | ↑ at 3h         | [7]  |
|         | TE-1      | 2,4,6,8  | 24h             | qRT-PCR     | ↑ at 24h        | [8]  |
|         | A549      | 6, 8     | 24h             | qRT-PCR     | ↑ at 24h        | [9]  |
|         | U251      | 10       | 3,6,12,24h      | qRT-PCR     | ↑ at 3,6,12h    | [10] |
| miR-34a | A549      | 40       | 24h             | microarrays | ↑ at 24h        | [11] |
|         | IM9       | 10       | 24h             | microarrays | ↑ at 24h        | [12] |
|         | serum     | 50       | 5 weeks         | qRT-PCR     | ↑ at 5 weeks    | [13] |
| miR-663 | AG01522   | 10       | 1h              | microarrays | ↑ at 1h         | [2]  |
|         | IM9       | 1, 10    | 24h             | microarrays | ↑ at 24h        | [14] |
|         | HFL-1     | 0.5,1.0  | 24h             | qRT-PCR     | ↑ at 24h        | [15] |
| miR-145 | TK6       | 2        | 0.5,4,8,12,24h  | qRT-PCR     | ↑ at 4h, 24h    | [1]  |
|         | HeLa      | 4,6,8    | 24h             | qRT-PCR     | ↑ at 24h        | [16] |
|         | blood     | 1.25     | 4h              | qRT-PCR     | ↑ at 4h         | [6]  |

1. Chaudhry, M.A.; Omaruddin, R.A. Differential regulation of microRNA expression in irradiated and bystander cells. *Mol Biol (Mosk)* **2012**, *46*, 634-643.
2. Simone, N.L.; Soule, B.P.; Ly, D.; Saleh, A.D.; Savage, J.E.; Degraff, W.; Cook, J.; Harris, C.C.; Gius, D.; Mitchell, J.B. Ionizing radiation-induced oxidative stress alters miRNA expression. *PLoS One* **2009**, *4*, e6377, doi:10.1371/journal.pone.0006377.
3. Chaudhry, M.A.; Sachdeva, H.; Omaruddin, R.A. Radiation-induced micro-RNA modulation in glioblastoma cells differing in DNA-repair pathways. *DNA Cell Biol* **2010**, *29*, 553-561, doi:10.1089/dna.2009.0978.
4. Wagner-Ecker, M.; Schwager, C.; Wirkner, U.; Abdollahi, A.; Huber, P.E. MicroRNA expression

- after ionizing radiation in human endothelial cells. *Radiat Oncol* **2010**, 5, 25, doi:10.1186/1748-717X-5-25.
5. Chen, G.; Zhu, W.; Shi, D.; Lv, L.; Zhang, C.; Liu, P.; Hu, W. MicroRNA-181a sensitizes human malignant glioma U87MG cells to radiation by targeting Bcl-2. *Oncol Rep* **2010**, 23, 997-1003, doi:10.3892/or\_00000725.
  6. Templin, T.; Paul, S.; Amundson, S.A.; Young, E.F.; Barker, C.A.; Wolden, S.L.; Smilenov, L.B. Radiation-induced micro-RNA expression changes in peripheral blood cells of radiotherapy patients. *Int J Radiat Oncol Biol Phys* **2011**, 80, 549-557, doi:10.1016/j.ijrobp.2010.12.061.
  7. Yin, X.; Tian, W.; Wang, L.; Wang, J.; Zhang, S.; Cao, J.; Yang, H. Radiation quality-dependence of bystander effect in unirradiated fibroblasts is associated with TGF-beta1-Smad2 pathway and miR-21 in irradiated keratinocytes. *Sci Rep* **2015**, 5, 11373, doi:10.1038/srep11373.
  8. Lin, J.; Liu, Z.; Liao, S.; Li, E.; Wu, X.; Zeng, W. Elevation of long non-coding RNA GAS5 and knockdown of microRNA-21 up-regulate RECK expression to enhance esophageal squamous cell carcinoma cell radio-sensitivity after radiotherapy. *Genomics* **2020**, 112, 2173-2185, doi:10.1016/j.ygeno.2019.12.013.
  9. Song, Y.; Zuo, Y.; Qian, X.L.; Chen, Z.P.; Wang, S.K.; Song, L.; Peng, L.P. Inhibition of MicroRNA-21-5p Promotes the Radiation Sensitivity of Non-Small Cell Lung Cancer Through HMSH2. *Cell Physiol Biochem* **2017**, 43, 1258-1272, doi:10.1159/000481839.
  10. Li, Y.; Zhao, S.; Zhen, Y.; Li, Q.; Teng, L.; Asai, A.; Kawamoto, K. A miR-21 inhibitor enhances apoptosis and reduces G(2)-M accumulation induced by ionizing radiation in human glioblastoma U251 cells. *Brain Tumor Pathol* **2011**, 28, 209-214, doi:10.1007/s10014-011-0037-1.
  11. Shin, S.; Cha, H.J.; Lee, E.M.; Lee, S.J.; Seo, S.K.; Jin, H.O.; Park, I.C.; Jin, Y.W.; An, S. Alteration of miRNA profiles by ionizing radiation in A549 human non-small cell lung cancer cells. *Int J Oncol* **2009**, 35, 81-86.
  12. An. Identification of ionizing radiation-responsive microRNAs in the IM9 human B lymphoblastic cell line. *International Journal of Oncology* **2009**, 34, 1661---1668.
  13. Halimi, M.; Shahabi, A.; Moslemi, D.; Parsian, H.; Asghari, S.M.; Sariri, R.; Yeganeh, F.; Zabihi, E. Human serum miR-34a as an indicator of exposure to ionizing radiation. *Radiat Environ Biophys* **2016**, 55, 423-429, doi:10.1007/s00411-016-0661-6.
  14. Cha, H.J.; Shin, S.; Yoo, H.; Lee, E.M.; Bae, S.; Yang, K.H.; Lee, S.J.; Park, I.C.; Jin, Y.W.; An, S. Identification of ionizing radiation-responsive microRNAs in the IM9 human B lymphoblastic cell line. *Int J Oncol* **2009**, 34, 1661-1668, doi:10.3892/ijo\_00000297.
  15. Chauhan, V.; Howland, M.; Wilkins, R. Effects of alpha-Particle Radiation on MicroRNA Responses in Human Cell-Lines. *Open Biochem J* **2012**, 6, 16-22, doi:10.2174/1874091X01206010016.
  16. Ye, C.; Sun, N.X.; Ma, Y.; Zhao, Q.; Zhang, Q.; Xu, C.; Wang, S.B.; Sun, S.H.; Wang, F.; Li, W. MicroRNA-145 contributes to enhancing radiosensitivity of cervical cancer cells. *FEBS Lett* **2015**, 589, 702-709, doi:10.1016/j.febslet.2015.01.037.
