# Supplementary material for: A Biomarker Panel of Radiation-Upregulated miRNA as Signature for Ionizing Radiation Exposure
Source: MDPI journal article supplement (doi:10.3390/life10120361), 2020-12-18
Supplement: s1 [file s1]

**Table S1.** The specific primer sequences for the PCR detection of miRNAs expression

| miRNA                           | PCR Primer sequence      |
|---------------------------------|--------------------------|
| Has-let-7e-Forward primer       | TGCCGCTGAGGTAGGAGG       |
| Has-let-7e-Reverse primer       | TGGAGCCTGGGACGAGA        |
| Has-let-7g-Forward primer       | GCCGCTGAGGTAGTAGTTTGTA   |
| Has-let-7g-Reverse primer       | TGGAGCCTGGGACGAGA        |
| Has-miR-21-Forward primer       | TCGCCCCGTAGCTTATCAGACT   |
| Has-miR-21-Reverse primer       | CAGAGCAGGGTCCGAGGTA      |
| Has-miR-34a-Forward primer      | AGCCGCTGGCAGTGTCTTA      |
| Has-miR-34a-Reverse primer      | CAGAGCAGGGTCCGAGGTA      |
| Has-miR-145-Forward primer      | TGCTCTGGATTCTGGAAT       |
| Has-miR-145-Reverse primer      | TATGGTTGTTCTGCTCTCTGTCTC |
| Has-miR-663-Forward primer      | GACTCAATAGGCGGGGCG       |
| Has-miR-663-Reverse primer      | TATGGTTGTTACGACTCCTTCAC  |
| Has-miR-1273g-3p-Forward primer | AGACCACACCACTGCACTCC     |
| Has-miR-1273g-3p-Reverse primer | CAGAGCAGGGTCCGAGGTA      |
| Has-miR-1307-3p-Forward primer  | GGACTCGGCGTGGCGT         |
| Has-miR-1307-3p-Reverse primer  | TATGGTTGTTACGACTCCTTCAC  |
| Has-miR-3197-Forward primer     | TCCGAGGGAGGCGCAGGC       |
| Has-miR-3197-Reverse primer     | TGGAGCCTGGGACGAGA        |
| Has-miR-4324-Forward primer     | CTTCCCTTCCCTGAGACCCT     |
| Has-miR-4324-Reverse primer     | TATGGTTGTTACGACTCCTTCAC  |
| Has-miR-4638-5p-Forward primer  | GGGTTTCCTGGACACCGCTC     |
| Has-miR-4638-5p-Reverse primer  | TATGGTTGTTACGACTCCTTCAC  |
| Has-miR-5096-Forward primer     | GGTCCCAAGTTTCACCATGTT    |
| Has-miR-5096-Reverse primer     | TATGGTTGTTACGACTCCTTCAC  |
| Has-miR-6090-Forward primer     | TTCCTTTGGGGAGCGAGG       |
| Has-miR-6090-Reverse primer     | TATGGTTGTTACGACTCCTTCAC  |
| Has-miR-6727-5p-Forward primer  | CTCGGGGCAGGCGG           |
| Has-miR-6727-5p-Reverse primer  | TATGGTTGTTACGACTCCTTCAC  |
| Has-miR-7641-Forward primer     | CGCTGGGTTGATCTCGGA       |
| Has-miR-7641-Reverse primer     | CAGTTGGTCAGCAGTTCTTGGTAT |
| U6 snRNA-Forward primer         | CGCTTCGGCAGCACATATAC     |
| U6 snRNA-Revere primer          | TTCACGAATTTGCGTGTCATA    |
