# Supplementary material for: A Biomarker Panel of Radiation-Upregulated miRNA as Signature for Ionizing Radiation Exposure
Source: Life (Basel). 2020 Dec 18;10(12):361. doi: 10.3390/life10120361 (PMC7766228; doi:10.3390/life10120361)
Supplement: Supplementary file 1 [file life-10-00361-s001.zip]

Archive with 10 entries (10 files):
- Figure S1.pdf
- Figure S2.pdf
- Figure S3.pdf
- Legends of Supplementary Materials.pdf
- Table S1.pdf
- Table S2.xlsx
- Table S3.xlsx
- Table S4.xlsx
- Table S5.xlsx
- Table S6.pdf
