# Supplementary material for: A Biomarker Panel of Radiation-Upregulated miRNA as Signature for Ionizing Radiation Exposure
Source: Life (Basel). 2020 Dec 18;10(12):361. doi: 10.3390/life10120361 (PMC7766228; doi:10.3390/life10120361)
Supplement: Supplementary file 1 [file life-10-00361-s001.zip › Table S2.xlsx]

## Sheet: 数据
miRNA name	Control signal	P-value	IR_0.5 h signal	P-value	fold change
hsa-miR-3607-5p	1246.38	4.32e-54	736.357	6.0112e-113	-0.526286
hsa-miR-4521	3585.91	8.89e-85	2188.93	1.5623e-95	-0.4936
hsa-let-7i-5p	7870.44	1.71e-287	5103.24	5.8628e-154	-0.433239
hsa-miR-361-5p	897.273	1.55e-29	593.348	8.54058e-05	-0.413579
hsa-miR-574-5p	861.908	8.53e-25	591.299	1.12545e-40	-0.376827
hsa-let-7b-5p	2746.99	2.65e-32	1898.34	5.1547e-100	-0.369527
hsa-miR-128-3p	756.962	6e-20	540.184	1.33362e-14	-0.337403
hsa-miR-1973	916.952	7.33e-25	683.683	2.53847e-39	-0.293561
hsa-miR-425-5p	1526.21	9.85e-148	1142.63	4.21018e-93	-0.289455
hsa-miR-423-5p	983.435	7.18e-82	756.087	2.7233e-35	-0.262895
hsa-miR-130a-3p	4450.94	6.1e-25	3432.12	8.0747e-190	-0.259937
hsa-miR-100-5p	3845.47	6.73e-31	2966.79	7.50963e-74	-0.259417
hsa-miR-106b-5p	1648.74	1.17e-68	1279.3	3.80316e-98	-0.253699
hsa-miR-378d	767.95	1.11e-97	596.442	3.08357e-86	-0.252742
hsa-miR-151a-5p	4554.13	8.12e-36	3585.05	2.3839e-127	-0.239263
hsa-miR-99b-5p	1635.8	5.22e-75	1295.03	3.54889e-46	-0.2336
hsa-miR-151b	4584.11	8.18e-39	3659.38	0	-0.225302
hsa-miR-151a-3p	1125.29	1.42e-47	898.985	6.76343e-21	-0.224527
hsa-miR-103a-3p	4701.69	3.8e-54	3831.44	1.2764e-165	-0.204681
hsa-miR-320c	1190.18	0	973.714	1.16957e-49	-0.20074
hsa-miR-7-5p	1661.24	1.47e-12	1365.52	0.00322575	-0.19603
hsa-miR-22-3p	2219.39	2.33e-33	1842.54	1.20318e-63	-0.186088
hsa-miR-29b-1-5p	774.628	2.06e-34	643.795	1.24455e-75	-0.185003
hsa-miR-140-3p	1730.17	2.25e-47	1440.91	3.26379e-17	-0.182942
hsa-miR-107	4563.45	7.94e-62	3903.45	4.21091e-29	-0.156218
hsa-miR-320e	1081.17	6.17e-89	925.227	3.7889e-125	-0.155763
hsa-miR-221-3p	6885.58	4.75e-77	5938.64	1.1995e-116	-0.147948
hsa-miR-183-5p	817.472	4.16e-26	705.323	3.24578e-14	-0.147561
hsa-miR-191-5p	5196.41	5.62e-171	4497.98	3.64566e-82	-0.14434
hsa-miR-200a-3p	1860.15	1.03e-59	1615.9	3.31712e-27	-0.140764
hsa-miR-30a-5p	8762.74	1.28e-56	7681.15	2.70486e-17	-0.13174
hsa-miR-320a	1310.16	9.38e-30	1156.48	8.11231e-47	-0.124771
hsa-miR-222-3p	7970.08	4.42e-40	7037.39	1.815e-116	-0.124457
hsa-miR-320d	1105.16	3.89e-81	979.406	1.41552e-66	-0.120801
hsa-miR-29a-3p	7019.65	4.42e-42	6223.52	2.94371e-47	-0.120376
hsa-miR-8485	1117.53	3.84e-31	995.694	3.28481e-52	-0.115433
hsa-miR-16-5p	7144.58	2.07e-55	6403.55	9.33949e-44	-0.109501
hsa-miR-31-5p	2828.37	3.99e-43	2539.52	4.66806e-63	-0.107723
hsa-miR-4734	39443	1.75e-217	35479.2	0	-0.105911
hsa-miR-27a-3p	1194.86	4.57e-12	1081.59	4.44787e-09	-0.099597
hsa-miR-23a-3p	5485.64	6.44e-186	4981.79	4.137e-140	-0.0963439
hsa-miR-21-5p	12607.2	9.76e-109	11509.7	5.6554e-107	-0.0910757
hsa-miR-186-5p	1684.54	4.68e-45	1538.91	8.07578e-59	-0.0904163
hsa-let-7d-5p	9604.73	7.6e-80	8802.49	0	-0.0872211
hsa-miR-93-5p	1446.15	5.75e-30	1326	9.32027e-43	-0.0867389
hsa-miR-30c-5p	9653.34	8.32e-98	8855.65	2.3566e-121	-0.086248
hsa-miR-15b-5p	9075	0	8374.64	0	-0.080315
hsa-miR-429	995.201	4.35e-40	921.078	9.75624e-66	-0.0773994
hsa-let-7a-5p	9916.56	7.84e-22	9180.32	6.58857e-17	-0.0771445
hsa-let-7f-5p	12546.4	0	11677.1	0	-0.0717978
hsa-miR-320b	1095.12	4.97e-69	1021.91	1.17017e-47	-0.0691941
hsa-miR-26a-5p	5776.84	3.93e-43	5441.81	6.38228e-35	-0.0597456
hsa-miR-6087	847.777	5.47e-35	799.26	2.61695e-95	-0.0589318
hsa-miR-1273g-3p	5836.71	0	5516.15	4.0791e-308	-0.0564865
hsa-miR-27b-3p	547.036	1.17e-10	519.047	1.66565e-56	-0.0525204
mcmv-miR-M23-2-3p	37497.1	0	35581.6	0	-0.0524335
hsa-miR-24-3p	7009.77	4.59e-36	6654.01	1.8806e-239	-0.0520851
hsa-miR-378a-3p	1496.25	4.87e-78	1432.59	3.539e-107	-0.043476
hsa-miR-200b-3p	3955.58	0	3793.31	9.7734e-269	-0.0418869
hsa-miR-181a-5p	4591.8	6.74e-94	4412.54	1.53603e-22	-0.0398207
hsa-miR-4455	617.34	2.2e-20	597.579	1.06468e-93	-0.0325345
hsa-miR-574-3p	716.51	6.27e-39	697.897	2.88135e-41	-0.0263214
hsa-miR-10a-5p	1103.07	1.61e-11	1077.08	7.11918e-38	-0.023839
hsa-miR-342-3p	615.529	3.28e-22	601.225	7.38482e-14	-0.0235118
hsa-miR-378i	567.802	1.74e-34	565.681	5.15355e-72	-0.00374251
hsa-miR-148b-3p	1027.32	6.18e-68	1023.61	1.98083e-67	-0.00361472
hsa-miR-3197	747.297	6.83e-18	12469.8	1.44539e-58	2.81461
hsa-miR-5096	1943.13	4.82e-14	28993.5	0	2.70277
hsa-miR-4267	5606.75	2.8e-50	23057	0	1.414
hhv6b-miR-Ro6-4-5p	4519.71	3.34e-99	16192.8	6.03797e-41	1.27612
hsa-miR-1260b	2101.03	1.42e-69	5137.58	0	0.894153
hsa-miR-1307-3p	590.04	7.94e-21	1380.21	3.60551e-37	0.849801
hsa-miR-424-5p	697.926	1.61e-07	1611.1	1.21639e-66	0.836561
hsa-let-7e-5p	3060.15	3.45e-93	6477	0	0.749794
hsa-miR-4324	681.833	3.02e-12	1201.41	4.46316e-64	0.56647
hsa-let-7c-5p	4007.43	3.93e-57	6486.79	0	0.481617
hsa-miR-29b-3p	6211.28	1.06e-109	9402.04	0	0.414561
hsa-miR-4286	866.174	8.39e-77	1299.11	4.28653e-71	0.40535
hsa-miR-197-3p	725.207	1.06e-07	1032.32	8.19716e-11	0.353102
hsa-miR-374b-5p	775.779	3.08e-58	1102.92	2.07233e-84	0.351853
hsa-miR-7977	3226.09	5.97e-73	4537.52	0	0.341108
hsa-miR-6089	634.655	2.18e-34	812.078	2.843e-111	0.246514
hsa-miR-374c-5p	758.188	5.76e-32	969.587	7.99813e-41	0.245939
hsa-miR-4454	2724.46	1.53e-100	3433.48	0	0.231305
hsa-miR-6088	564.758	1.23e-16	696.245	7.20656e-43	0.209305
hvt-miR-H14-3p	3858.69	4.92e-36	4755.74	1.1629e-169	0.209024
hsa-miR-30e-5p	6056.5	6.17e-72	7414.27	0	0.202274
hsa-miR-19b-3p	1212.28	6.95e-29	1460.36	3.2366e-162	0.186176
hsa-miR-181b-5p	2540.77	4.99e-59	3044.94	1.1556e-106	0.181014
hsa-miR-17-5p	1626.95	1.46e-20	1890.53	3.0669e-27	0.150151
hsa-miR-15a-5p	1023	3.47e-18	1187.65	6.05825e-15	0.14924
hsa-miR-4497	532.506	2.23e-31	617.921	7.62653e-44	0.148767
hsa-miR-454-3p	1398.45	3.82e-60	1622.49	1.46047e-62	0.148595
hsa-miR-455-3p	1145.38	5.72e-40	1322.61	7.73512e-62	0.143864
hsa-miR-3960	614.751	8.45e-51	707.605	2.36171e-45	0.140669
hsa-miR-20a-5p	1675.18	2.91e-21	1904.52	2.03533e-35	0.128311
hsa-miR-26b-5p	3260.97	2.77e-58	3700.01	1.229e-144	0.12631
hsa-miR-378e	1218.18	7.28e-71	1368.51	7.05766e-79	0.116359
hsa-miR-125a-5p	2955.76	2.3e-44	3289.67	4.85429e-96	0.10703
hsa-miR-7641	3549.28	7.13e-40	3912.39	8.4777e-163	0.0974045
hsa-miR-23b-3p	4213.71	2.08e-131	4581.77	0	0.0837416
hsa-miR-10b-5p	1097.85	5.01e-44	1188	8.67337e-65	0.0789141
hsa-miR-106a-5p	1587.04	6.73e-39	1685.39	2.86293e-26	0.0601286
hsa-miR-155-5p	1422.35	1.91e-21	1491.11	9.97298e-09	0.0472066
hsa-miR-4443	3373.92	8.38e-64	3533.12	0	0.0461064
hsa-miR-25-3p	2720	1.93e-11	2831.68	4.02584e-21	0.0402365
hsa-miR-92a-3p	4063.23	3.85e-60	4228.69	3.712e-144	0.0399161
hsa-miR-98-5p	1927.06	1.83e-23	2001.94	3.7713e-37	0.0381239
hsa-miR-1246	567.562	4.42e-31	587.111	6.76683e-73	0.0338639
hsa-miR-30b-5p	6057.58	0	6226.31	5.0324e-201	0.0274735
hsa-miR-30d-5p	6427.59	8.01e-89	6574.07	6.5401e-289	0.0225336
hsa-miR-378g	631.755	5.39e-24	642.889	2.06682e-37	0.0174697
hsa-let-7g-5p	5126.23	1.2e-256	5168.12	0	0.008138
hsa-miR-182-5p	1521.89	7.07e-47	1533.94	1.18689e-33	0.00789189
hsa-miR-30a-3p	905.722	2.45e-12	910.705	3.8056e-18	0.00548614
hsa-miR-146a-5p	6680.75	4.15e-42	6711.16	1.64023e-51	0.0045422
hsa-miR-125b-5p	1995.28	1.03e-78	2003.72	2.7845e-118	0.00421996
