# Supplementary material for: A Biomarker Panel of Radiation-Upregulated miRNA as Signature for Ionizing Radiation Exposure
Source: Life (Basel). 2020 Dec 18;10(12):361. doi: 10.3390/life10120361 (PMC7766228; doi:10.3390/life10120361)
Supplement: Supplementary file 1 [file life-10-00361-s001.zip › Table S3.xlsx]

## Sheet: 数据
miRNA name	Control signal	P-value	IR_2 h signal	P-value	LN(fold change)
mcmv-miR-M23-2-3p	37497.1	0	10402	1.27782e-34	-1.28
hsa-let-7d-5p	9604.73	7.6e-80	4744.07	3.78291e-05	-0.71
hhv6b-miR-Ro6-4-5p	4519.71	3.34e-99	2529.89	1.13892e-37	-0.58
hsa-miR-100-5p	3845.47	6.73e-31	2212.07	7.78771e-05	-0.55
hsa-let-7a-5p	9916.56	7.84e-22	5841.85	0.00222158	-0.53
hsa-miR-4267	5606.75	2.8e-50	3320.21	6.61237e-84	-0.52
hsa-miR-99b-5p	1635.8	5.22e-75	970.832	0.000852409	-0.52
hsa-let-7g-5p	5126.23	1.2e-256	3190.41	7.80874e-09	-0.47
hsa-let-7i-5p	7870.44	1.71e-287	4978.97	9.98522e-12	-0.46
hsa-miR-106b-5p	1648.74	1.17e-68	1037.36	2.80199e-33	-0.46
hsa-miR-10a-5p	1103.07	1.61e-11	697.989	0.0056583	-0.46
hsa-miR-361-5p	897.273	1.55e-29	565.096	0.000469363	-0.46
hsa-miR-4734	39443	1.75e-217	25069.2	0	-0.45
hsa-miR-4521	3585.91	8.89e-85	2329.25	1.11222e-15	-0.43
hsa-miR-320a	1310.16	9.38e-30	888.727	0.000707109	-0.39
hsa-miR-320c	1190.18	0	811.299	7.70836e-05	-0.38
hsa-miR-423-5p	983.435	7.18e-82	678.608	2.69384e-21	-0.37
hsa-miR-7977	3226.09	5.97e-73	2317.95	1.36542e-05	-0.33
hsa-miR-19b-3p	1212.28	6.95e-29	874.366	1.14948e-08	-0.33
hsa-miR-128-3p	756.962	6e-20	542.304	0.00316301	-0.33
hsa-miR-320d	1105.16	3.89e-81	803.233	0.000185886	-0.32
hsa-miR-454-3p	1398.45	3.82e-60	1106.09	5.78954e-07	-0.23
hsa-miR-425-5p	1526.21	9.85e-148	1228.47	3.57608e-07	-0.22
hsa-miR-26b-5p	3260.97	2.77e-58	2649.58	5.65478e-06	-0.21
hsa-miR-320e	1081.17	6.17e-89	871.206	7.85873e-06	-0.22
hsa-let-7c-5p	4007.43	3.93e-57	3304.84	6.95236e-05	-0.19
hsa-miR-378a-3p	1496.25	4.87e-78	1219.59	5.04896e-08	-0.2
hsa-miR-30c-5p	9653.34	8.32e-98	8041.02	1.6577e-06	-0.18
hsa-miR-455-3p	1145.38	5.72e-40	962.153	0.000995527	-0.17
hsa-miR-181b-5p	2540.77	4.99e-59	2173.67	7.65393e-05	-0.16
hsa-miR-320b	1095.12	4.97e-69	953.61	2.55935e-05	-0.14
hsa-miR-98-5p	1927.06	1.83e-23	1698.85	0.00510838	-0.13
hsa-miR-151a-3p	1125.29	1.42e-47	1005.43	3.93516e-08	-0.11
hsa-miR-574-3p	716.51	6.27e-39	646.557	2.11401e-09	-0.1
hsa-miR-222-3p	7970.08	4.42e-40	7373.96	2.37142e-06	-0.08
hsa-miR-30a-3p	905.722	2.45e-12	843.664	1.8873e-05	-0.07
hsa-miR-200b-3p	3955.58	0	3721	3.61442e-19	-0.06
hsa-miR-221-3p	6885.58	4.75e-77	6529.64	3.98573e-06	-0.05
hsa-miR-191-5p	5196.41	5.62e-171	4961	7.89376e-06	-0.05
hsa-miR-186-5p	1684.54	4.68e-45	1598.96	1.3778e-07	-0.05
hsa-miR-15b-5p	9075	0	8668.57	2.78566e-13	-0.05
hsa-miR-10b-5p	1097.85	5.01e-44	1068.99	1.38475e-06	-0.03
hsa-miR-25-3p	2720	1.93e-11	2657.13	9.72357e-07	-0.02
hsa-miR-93-5p	1446.15	5.75e-30	1423.01	1.67018e-14	-0.02
hsa-let-7f-5p	12546.4	0	12471.7	3.90248e-38	-0.01
hsa-miR-140-3p	1730.17	2.25e-47	1715.64	1.43496e-20	-0.01
hsa-miR-182-5p	1521.89	7.07e-47	1520.97	9.25033e-05	0
hsa-miR-3197	747.297	6.83e-18	3911.79	2.23291e-47	1.66
hsa-miR-1307-3p	590.04	7.94e-21	2440.28	9.89218e-48	1.42
hsa-miR-1246	567.562	4.42e-31	2304.49	1.35239e-75	1.4
hsa-miR-7641	3549.28	7.13e-40	12243	0	1.24
hsa-miR-4454	2724.46	1.53e-100	7982.53	0	1.07
hsa-miR-5096	1943.13	4.82e-14	4709.03	5.61208e-23	0.89
hsa-miR-4324	681.833	3.02e-12	1626.24	7.14306e-10	0.87
hsa-miR-29b-3p	6211.28	1.06e-109	14763	1.46408e-14	0.87
hsa-miR-378i	567.802	1.74e-34	1204.51	1.46953e-47	0.75
hsa-miR-15a-5p	1023	3.47e-18	2152.6	0.000104338	0.74
hsa-miR-378g	631.755	5.39e-24	1299.8	3.02003e-34	0.72
hsa-miR-1273g-3p	5836.71	0	11226.4	3.0806e-227	0.65
hsa-miR-4443	3373.92	8.38e-64	6184.25	1.9379e-68	0.61
hsa-miR-378e	1218.18	7.28e-71	2175.45	1.6195e-110	0.58
hsa-miR-1260b	2101.03	1.42e-69	3711.44	6.24735e-38	0.57
hsa-let-7e-5p	3060.15	3.45e-93	5122.17	0.00166534	0.52
hvt-miR-H14-3p	3858.69	4.92e-36	6240.97	1.78472e-23	0.48
hsa-miR-23b-3p	4213.71	2.08e-131	6743.86	6.96229e-28	0.47
hsa-miR-4497	532.506	2.23e-31	808.03	2.96451e-97	0.42
hsa-miR-4455	617.34	2.2e-20	933.647	6.52589e-45	0.41
hsa-miR-6088	564.758	1.23e-16	843.169	4.46814e-14	0.4
hsa-miR-378d	767.95	1.11e-97	1130.61	6.9676e-134	0.39
hsa-miR-6087	847.777	5.47e-35	1238.56	1.2314e-23	0.38
hsa-miR-16-5p	7144.58	2.07e-55	10324.4	6.1283e-34	0.37
hsa-miR-27a-3p	1194.86	4.57e-12	1728.39	4.78455e-05	0.37
hsa-miR-30a-5p	8762.74	1.28e-56	12216.1	6.09266e-58	0.33
hsa-miR-30e-5p	6056.5	6.17e-72	8040.92	0.00927742	0.28
hsa-miR-17-5p	1626.95	1.46e-20	2113.81	3.66301e-10	0.26
hsa-miR-20a-5p	1675.18	2.91e-21	2165.89	4.9227e-11	0.26
hsa-miR-30d-5p	6427.59	8.01e-89	8134.3	5.49953e-09	0.24
hsa-miR-148b-3p	1027.32	6.18e-68	1279.3	7.04318e-27	0.22
hsa-miR-106a-5p	1587.04	6.73e-39	1972.38	2.41409e-15	0.22
hsa-miR-8485	1117.53	3.84e-31	1384.59	6.33509e-25	0.21
hsa-miR-3960	614.751	8.45e-51	752.846	2.31648e-43	0.2
hsa-miR-23a-3p	5485.64	6.44e-186	6563.87	1.10285e-16	0.18
hsa-miR-24-3p	7009.77	4.59e-36	8260.82	5.69669e-40	0.16
hsa-miR-151a-5p	4554.13	8.12e-36	5355.35	4.25578e-10	0.16
hsa-miR-22-3p	2219.39	2.33e-33	2619.95	1.01801e-07	0.17
hsa-miR-6089	634.655	2.18e-34	721.156	1.32886e-08	0.13
hsa-miR-3607-5p	1246.38	4.32e-54	1394.92	0.00270932	0.11
hsa-miR-30b-5p	6057.58	0	6732.28	3.73262e-12	0.11
hsa-miR-200a-3p	1860.15	1.03e-59	2070.58	1.76554e-09	0.11
hsa-miR-21-5p	12607.2	9.76e-109	13714.4	2.05675e-16	0.08
hsa-miR-107	4563.45	7.94e-62	4959.48	1.81929e-10	0.08
hsa-miR-103a-3p	4701.69	3.8e-54	5092.91	6.53209e-24	0.08
hsa-miR-92a-3p	4063.23	3.85e-60	4344.11	2.30552e-17	0.07
hsa-miR-92b-3p	2936.66	5.26e-155	3153.03	1.2811e-57	0.07
hsa-miR-181a-5p	4591.8	6.74e-94	4812.12	1.89576e-13	0.05
hsa-miR-26a-5p	5776.84	3.93e-43	6009.2	4.87227e-10	0.04
hsa-miR-29a-3p	7019.65	4.42e-42	7075.22	4.37762e-11	0.01
hsa-miR-197-3p	725.207	1.06e-07	732.746	3.95318e-05	0.01
