# Supplementary material for: A Biomarker Panel of Radiation-Upregulated miRNA as Signature for Ionizing Radiation Exposure
Source: Life (Basel). 2020 Dec 18;10(12):361. doi: 10.3390/life10120361 (PMC7766228; doi:10.3390/life10120361)
Supplement: Supplementary file 1 [file life-10-00361-s001.zip › Table S4.xlsx]

## Sheet: data (DIANA)
Table S4. Prediction of target genes of significantly differentially expressed miRNAs in HUVEC cells before and after 4 Gy of γ-ray irradiation by DIANA TOOLS. This table shows predicting results of 7 human significantly differentially expressed miRNAs.
miRNA	Gene symbol	Gene Id (name)	Transcript Id	miTG score
hsa-miR-1246	MARCH3	ENSG00000173926 (MARCH3)	ENST00000308660	0.893419
hsa-miR-1246	MARCH6	ENSG00000145495 (MARCH6)	ENST00000274140	0.788063
hsa-miR-1246	SEPT7	ENSG00000122545 (SEPT7)	ENST00000494488	0.948964
hsa-miR-1246	SEP15	ENSG00000183291 (SEP15)	ENST00000331835	0.706724
hsa-miR-1246	ABCC3	ENSG00000108846 (ABCC3)	ENST00000502426	0.730948
hsa-miR-1246	AC008394.1	ENSG00000233828 (AC008394.1)	ENST00000445770	0.848469
hsa-miR-1246	AC010547.9	ENSG00000261611 (AC010547.9)	ENST00000561908	0.858651
hsa-miR-1246	AC145676.2	ENSG00000249852 (AC145676.2)	ENST00000514988	0.733067
hsa-miR-1246	ACO1	ENSG00000122729 (ACO1)	ENST00000309951	0.748585
hsa-miR-1246	ACVR1	ENSG00000115170 (ACVR1)	ENST00000263640	0.882742
hsa-miR-1246	ACVR2A	ENSG00000121989 (ACVR2A)	ENST00000241416	0.918824
hsa-miR-1246	ADAM22	ENSG00000008277 (ADAM22)	ENST00000398204	0.798586
hsa-miR-1246	ADAM28	ENSG00000042980 (ADAM28)	ENST00000265769	0.815659
hsa-miR-1246	ADAMTS10	ENSG00000142303 (ADAMTS10)	ENST00000596851	0.770181
hsa-miR-1246	ADAMTS18	ENSG00000140873 (ADAMTS18)	ENST00000282849	0.741376
hsa-miR-1246	ADAMTS6	ENSG00000049192 (ADAMTS6)	ENST00000381052	0.964393
hsa-miR-1246	ADAMTS8	ENSG00000134917 (ADAMTS8)	ENST00000257359	0.85655
hsa-miR-1246	AGL	ENSG00000162688 (AGL)	ENST00000370161	0.795085
hsa-miR-1246	AGO1	ENSG00000092847 (AGO1)	ENST00000373204	0.722978
hsa-miR-1246	AHSA2	ENSG00000173209 (AHSA2)	ENST00000394457	0.786975
hsa-miR-1246	AKAP2	ENSG00000241978 (AKAP2)	ENST00000374525	0.879817
hsa-miR-1246	AKNAD1	ENSG00000162641 (AKNAD1)	ENST00000472781	0.701269
hsa-miR-1246	AL590452.1	ENSG00000268172 (AL590452.1)	ENST00000596396	0.743124
hsa-miR-1246	ALDH5A1	ENSG00000112294 (ALDH5A1)	ENST00000357578	0.70846
hsa-miR-1246	ALDH6A1	ENSG00000119711 (ALDH6A1)	ENST00000553458	0.706164
hsa-miR-1246	ALDH7A1	ENSG00000164904 (ALDH7A1)	ENST00000409134	0.720018
hsa-miR-1246	AMMECR1	ENSG00000101935 (AMMECR1)	ENST00000262844	0.855955
hsa-miR-1246	AMPD3	ENSG00000133805 (AMPD3)	ENST00000444303	0.808907
hsa-miR-1246	ANGEL2	ENSG00000174606 (ANGEL2)	ENST00000360506	0.834888
hsa-miR-1246	ANGPT2	ENSG00000091879 (ANGPT2)	ENST00000325203	0.724662
hsa-miR-1246	ANGPTL1	ENSG00000116194 (ANGPTL1)	ENST00000234816	0.776482
hsa-miR-1246	ANK1	ENSG00000029534 (ANK1)	ENST00000289734	0.740674
hsa-miR-1246	ANK2	ENSG00000145362 (ANK2)	ENST00000505342	0.802565
hsa-miR-1246	ANKDD1B	ENSG00000189045 (ANKDD1B)	ENST00000601380	0.73936
hsa-miR-1246	ANKFY1	ENSG00000185722 (ANKFY1)	ENST00000341657	0.905219
hsa-miR-1246	ANKRD34C	ENSG00000235711 (ANKRD34C)	ENST00000421388	0.901207
hsa-miR-1246	ANKRD66	ENSG00000230062 (ANKRD66)	ENST00000445060	0.764334
hsa-miR-1246	ANTXR1	ENSG00000169604 (ANTXR1)	ENST00000303714	0.806436
hsa-miR-1246	ANTXR2	ENSG00000163297 (ANTXR2)	ENST00000403729	0.87823
hsa-miR-1246	AP3B1	ENSG00000132842 (AP3B1)	ENST00000255194	0.895298
hsa-miR-1246	APLF	ENSG00000169621 (APLF)	ENST00000445692	0.75699
hsa-miR-1246	APTX	ENSG00000137074 (APTX)	ENST00000494649	0.709727
hsa-miR-1246	AQP1	ENSG00000240583 (AQP1)	ENST00000441328	0.762928
hsa-miR-1246	AR	ENSG00000169083 (AR)	ENST00000374690	0.728039
hsa-miR-1246	ARFIP1	ENSG00000164144 (ARFIP1)	ENST00000451320	0.859043
hsa-miR-1246	ARHGAP15	ENSG00000075884 (ARHGAP15)	ENST00000409869	0.884479
hsa-miR-1246	ARHGAP26	ENSG00000145819 (ARHGAP26)	ENST00000378004	0.742204
hsa-miR-1246	ARL4C	ENSG00000188042 (ARL4C)	ENST00000390645	0.87354
hsa-miR-1246	ARL5A	ENSG00000162980 (ARL5A)	ENST00000295087	0.742744
hsa-miR-1246	ARSJ	ENSG00000180801 (ARSJ)	ENST00000315366	0.948176
hsa-miR-1246	ASCC3	ENSG00000112249 (ASCC3)	ENST00000324696	0.704882
hsa-miR-1246	ASTN1	ENSG00000152092 (ASTN1)	ENST00000361833	0.706457
hsa-miR-1246	ASXL2	ENSG00000143970 (ASXL2)	ENST00000435504	0.704683
hsa-miR-1246	ASZ1	ENSG00000154438 (ASZ1)	ENST00000450714	0.776228
hsa-miR-1246	ATF1	ENSG00000123268 (ATF1)	ENST00000262053	0.829753
hsa-miR-1246	ATF6	ENSG00000118217 (ATF6)	ENST00000367942	0.808332
hsa-miR-1246	ATP1A4	ENSG00000132681 (ATP1A4)	ENST00000477338	0.762524
hsa-miR-1246	ATP1B1	ENSG00000143153 (ATP1B1)	ENST00000367816	0.82604
hsa-miR-1246	ATP2B1	ENSG00000070961 (ATP2B1)	ENST00000359142	0.751633
hsa-miR-1246	ATP2B2	ENSG00000157087 (ATP2B2)	ENST00000460129	0.756943
hsa-miR-1246	ATP2B4	ENSG00000058668 (ATP2B4)	ENST00000367218	0.74015
hsa-miR-1246	ATP6V1G3	ENSG00000151418 (ATP6V1G3)	ENST00000309309	0.797336
hsa-miR-1246	ATP8B4	ENSG00000104043 (ATP8B4)	ENST00000559726	0.780371
hsa-miR-1246	ATP9B	ENSG00000166377 (ATP9B)	ENST00000586366	0.700389
hsa-miR-1246	ATRN	ENSG00000088812 (ATRN)	ENST00000262919	0.871794
hsa-miR-1246	ATRX	ENSG00000085224 (ATRX)	ENST00000373344	0.733202
hsa-miR-1246	AUTS2	ENSG00000158321 (AUTS2)	ENST00000342771	0.803761
hsa-miR-1246	AXIN2	ENSG00000168646 (AXIN2)	ENST00000307078	0.867498
hsa-miR-1246	B3GALNT1	ENSG00000169255 (B3GALNT1)	ENST00000392780	0.72606
hsa-miR-1246	B3GAT2	ENSG00000112309 (B3GAT2)	ENST00000230053	0.806355
hsa-miR-1246	BACH1	ENSG00000156273 (BACH1)	ENST00000286800	0.872206
hsa-miR-1246	BAHD1	ENSG00000140320 (BAHD1)	ENST00000416165	0.704625
hsa-miR-1246	BAZ2B	ENSG00000123636 (BAZ2B)	ENST00000392782	0.783615
hsa-miR-1246	BCL2L14	ENSG00000121380 (BCL2L14)	ENST00000266434	0.707482
hsa-miR-1246	BCL2L2	ENSG00000129473 (BCL2L2)	ENST00000250405	0.889838
hsa-miR-1246	BCL9	ENSG00000116128 (BCL9)	ENST00000234739	0.74205
hsa-miR-1246	BEGAIN	ENSG00000183092 (BEGAIN)	ENST00000355173	0.705144
hsa-miR-1246	BEND4	ENSG00000188848 (BEND4)	ENST00000504360	0.974014
hsa-miR-1246	BEND7	ENSG00000165626 (BEND7)	ENST00000440282	0.941261
hsa-miR-1246	BHLHB9	ENSG00000198908 (BHLHB9)	ENST00000372735	0.82696
hsa-miR-1246	BMP7	ENSG00000101144 (BMP7)	ENST00000395863	0.732471
hsa-miR-1246	BNC2	ENSG00000173068 (BNC2)	ENST00000380672	0.82744
hsa-miR-1246	BRCC3	ENSG00000185515 (BRCC3)	ENST00000453705	0.928888
hsa-miR-1246	BRI3BP	ENSG00000184992 (BRI3BP)	ENST00000341446	0.867089
hsa-miR-1246	BRPF1	ENSG00000156983 (BRPF1)	ENST00000383829	0.792886
hsa-miR-1246	BRWD1	ENSG00000185658 (BRWD1)	ENST00000342449	0.91461
hsa-miR-1246	C10orf90	ENSG00000154493 (C10orf90)	ENST00000424927	0.816857
hsa-miR-1246	C11orf30	ENSG00000158636 (C11orf30)	ENST00000529032	0.793491
hsa-miR-1246	C11orf44	ENSG00000175728 (C11orf44)	ENST00000317019	0.732295
hsa-miR-1246	C11orf45	ENSG00000174370 (C11orf45)	ENST00000310799	0.827194
hsa-miR-1246	C12orf71	ENSG00000214700 (C12orf71)	ENST00000429849	0.814846
hsa-miR-1246	C14orf64	ENSG00000246223 (C14orf64)	ENST00000502187	0.771379
hsa-miR-1246	C15orf53	ENSG00000175779 (C15orf53)	ENST00000318792	0.850533
hsa-miR-1246	C17orf102	ENSG00000197322 (C17orf102)	ENST00000357754	0.708018
hsa-miR-1246	C17orf80	ENSG00000141219 (C17orf80)	ENST00000359042	0.733937
hsa-miR-1246	C19orf82	ENSG00000267106 (C19orf82)	ENST00000587536	0.977673
hsa-miR-1246	C1orf141	ENSG00000203963 (C1orf141)	ENST00000371007	0.722688
hsa-miR-1246	C1orf21	ENSG00000116667 (C1orf21)	ENST00000235307	0.769065
hsa-miR-1246	C20orf26	ENSG00000089101 (C20orf26)	ENST00000377309	0.832622
hsa-miR-1246	C22orf39	ENSG00000242259 (C22orf39)	ENST00000509549	0.702335
hsa-miR-1246	C22orf42	ENSG00000205856 (C22orf42)	ENST00000382097	0.994759
hsa-miR-1246	C2orf73	ENSG00000177994 (C2orf73)	ENST00000317627	0.733947
hsa-miR-1246	C3orf36	ENSG00000221972 (C3orf36)	ENST00000408895	0.846021
hsa-miR-1246	C4orf32	ENSG00000174749 (C4orf32)	ENST00000309733	0.795961
hsa-miR-1246	C4orf40	ENSG00000187533 (C4orf40)	ENST00000509633	0.870125
hsa-miR-1246	C4orf50	ENSG00000181215 (C4orf50)	ENST00000531445	0.769652
hsa-miR-1246	C5orf28	ENSG00000151881 (C5orf28)	ENST00000500337	0.716066
hsa-miR-1246	C5orf64	ENSG00000178722 (C5orf64)	ENST00000505642	0.747363
hsa-miR-1246	C9	ENSG00000113600 (C9)	ENST00000263408	0.813273
hsa-miR-1246	CA10	ENSG00000154975 (CA10)	ENST00000571371	0.972914
hsa-miR-1246	CADM1	ENSG00000182985 (CADM1)	ENST00000452722	0.870946
hsa-miR-1246	CADM2	ENSG00000175161 (CADM2)	ENST00000383699	0.904753
hsa-miR-1246	CAND1	ENSG00000111530 (CAND1)	ENST00000545606	0.726741
hsa-miR-1246	CAPN8	ENSG00000203697 (CAPN8)	ENST00000366873	0.847265
hsa-miR-1246	CAPZA1	ENSG00000116489 (CAPZA1)	ENST00000263168	0.704997
hsa-miR-1246	CASP14	ENSG00000105141 (CASP14)	ENST00000427043	0.884169
hsa-miR-1246	CBX5	ENSG00000094916 (CBX5)	ENST00000209875	0.824318
hsa-miR-1246	CCDC176	ENSG00000119636 (CCDC176)	ENST00000394009	0.928142
hsa-miR-1246	CCDC178	ENSG00000166960 (CCDC178)	ENST00000581852	0.982413
hsa-miR-1246	CCDC50	ENSG00000152492 (CCDC50)	ENST00000392455	0.786499
hsa-miR-1246	CCDC6	ENSG00000108091 (CCDC6)	ENST00000263102	0.701096
hsa-miR-1246	CCDC84	ENSG00000186166 (CCDC84)	ENST00000526463	0.760575
hsa-miR-1246	CCDC88A	ENSG00000115355 (CCDC88A)	ENST00000336838	0.843221
hsa-miR-1246	CCER1	ENSG00000197651 (CCER1)	ENST00000358859	0.930728
hsa-miR-1246	CCNG2	ENSG00000138764 (CCNG2)	ENST00000316355	0.789551
hsa-miR-1246	CCNT2	ENSG00000082258 (CCNT2)	ENST00000264157	0.767375
hsa-miR-1246	CCNY	ENSG00000108100 (CCNY)	ENST00000374706	0.713132
hsa-miR-1246	CCSER2	ENSG00000107771 (CCSER2)	ENST00000224756	0.77833
hsa-miR-1246	CD109	ENSG00000156535 (CD109)	ENST00000422508	0.787281
hsa-miR-1246	CD22	ENSG00000012124 (CD22)	ENST00000601769	0.834036
hsa-miR-1246	CD44	ENSG00000026508 (CD44)	ENST00000263398	0.72819
hsa-miR-1246	CD74	ENSG00000019582 (CD74)	ENST00000518797	0.78963
hsa-miR-1246	CDC42EP3	ENSG00000163171 (CDC42EP3)	ENST00000295324	0.877193
hsa-miR-1246	CDC73	ENSG00000134371 (CDC73)	ENST00000367435	0.946279
hsa-miR-1246	CDH2	ENSG00000170558 (CDH2)	ENST00000269141	0.79513
hsa-miR-1246	CDH8	ENSG00000150394 (CDH8)	ENST00000585315	0.835635
hsa-miR-1246	CDK12	ENSG00000167258 (CDK12)	ENST00000447079	0.742329
hsa-miR-1246	CDRT4	ENSG00000239704 (CDRT4)	ENST00000312177	0.700385
hsa-miR-1246	CEP104	ENSG00000116198 (CEP104)	ENST00000378230	0.722108
hsa-miR-1246	CEP89	ENSG00000121289 (CEP89)	ENST00000591698	0.739309
hsa-miR-1246	CFLAR	ENSG00000003402 (CFLAR)	ENST00000309955	0.768865
hsa-miR-1246	CFTR	ENSG00000001626 (CFTR)	ENST00000454343	0.817859
hsa-miR-1246	CGRRF1	ENSG00000100532 (CGRRF1)	ENST00000216420	0.711447
hsa-miR-1246	CHAMP1	ENSG00000198824 (CHAMP1)	ENST00000361283	0.736382
hsa-miR-1246	CHIC1	ENSG00000204116 (CHIC1)	ENST00000373504	0.783049
hsa-miR-1246	CHKA	ENSG00000110721 (CHKA)	ENST00000265689	0.93511
hsa-miR-1246	CHMP3	ENSG00000115561 (CHMP3)	ENST00000263856	0.820696
hsa-miR-1246	CHST9	ENSG00000154080 (CHST9)	ENST00000580774	0.798265
hsa-miR-1246	CISD1	ENSG00000122873 (CISD1)	ENST00000333926	0.800573
hsa-miR-1246	CLCC1	ENSG00000121940 (CLCC1)	ENST00000369969	0.841746
hsa-miR-1246	CLEC4C	ENSG00000198178 (CLEC4C)	ENST00000537530	0.89744
hsa-miR-1246	CLINT1	ENSG00000113282 (CLINT1)	ENST00000523094	0.835219
hsa-miR-1246	CLLU1	ENSG00000257127 (CLLU1)	ENST00000378485	0.72974
hsa-miR-1246	CLVS1	ENSG00000177182 (CLVS1)	ENST00000325897	0.893425
hsa-miR-1246	CMTM6	ENSG00000091317 (CMTM6)	ENST00000205636	0.907573
hsa-miR-1246	CNOT6L	ENSG00000138767 (CNOT6L)	ENST00000264903	0.718833
hsa-miR-1246	CNTN5	ENSG00000149972 (CNTN5)	ENST00000524871	0.772548
hsa-miR-1246	CNTN6	ENSG00000134115 (CNTN6)	ENST00000397479	0.780522
hsa-miR-1246	COBLL1	ENSG00000082438 (COBLL1)	ENST00000375458	0.705528
hsa-miR-1246	COG6	ENSG00000133103 (COG6)	ENST00000416691	0.856594
hsa-miR-1246	COLCA1	ENSG00000196167 (COLCA1)	ENST00000532918	0.71204
hsa-miR-1246	COPRS	ENSG00000172301 (COPRS)	ENST00000496655	0.807495
hsa-miR-1246	COPS2	ENSG00000166200 (COPS2)	ENST00000388901	0.721534
hsa-miR-1246	CPT2	ENSG00000157184 (CPT2)	ENST00000371486	0.734966
hsa-miR-1246	CR769776.1	ENSG00000204788 (CR769776.1)	ENST00000414341	0.993556
hsa-miR-1246	CRB1	ENSG00000134376 (CRB1)	ENST00000367397	0.781047
hsa-miR-1246	CREB5	ENSG00000146592 (CREB5)	ENST00000357727	0.950763
hsa-miR-1246	CREBL2	ENSG00000111269 (CREBL2)	ENST00000228865	0.966242
hsa-miR-1246	CREG2	ENSG00000175874 (CREG2)	ENST00000324768	0.747253
hsa-miR-1246	CSRNP3	ENSG00000178662 (CSRNP3)	ENST00000314499	0.889092
hsa-miR-1246	CT62	ENSG00000225362 (CT62)	ENST00000566432	0.923103
hsa-miR-1246	CTNNA3	ENSG00000183230 (CTNNA3)	ENST00000433211	0.812696
hsa-miR-1246	CTSC	ENSG00000109861 (CTSC)	ENST00000524463	0.814511
hsa-miR-1246	CTXN3	ENSG00000205279 (CTXN3)	ENST00000395322	0.744246
hsa-miR-1246	CUL2	ENSG00000108094 (CUL2)	ENST00000374754	0.936395
hsa-miR-1246	CWC27	ENSG00000153015 (CWC27)	ENST00000508024	0.783617
hsa-miR-1246	CXorf27	ENSG00000187516 (CXorf27)	ENST00000341016	0.845097
hsa-miR-1246	CXXC4	ENSG00000168772 (CXXC4)	ENST00000394767	0.706414
hsa-miR-1246	CYSTM1	ENSG00000120306 (CYSTM1)	ENST00000261811	0.772662
hsa-miR-1246	DAB1	ENSG00000173406 (DAB1)	ENST00000371236	0.937501
hsa-miR-1246	DCAF17	ENSG00000115827 (DCAF17)	ENST00000375255	0.715656
hsa-miR-1246	DCAF6	ENSG00000143164 (DCAF6)	ENST00000470721	0.825017
hsa-miR-1246	DCX	ENSG00000077279 (DCX)	ENST00000371993	0.802724
hsa-miR-1246	DDI1	ENSG00000170967 (DDI1)	ENST00000302259	0.899851
hsa-miR-1246	DDI2	ENSG00000197312 (DDI2)	ENST00000480945	0.717398
hsa-miR-1246	DENND2C	ENSG00000175984 (DENND2C)	ENST00000393276	0.715769
hsa-miR-1246	DENND2D	ENSG00000162777 (DENND2D)	ENST00000357640	0.745654
hsa-miR-1246	DGKI	ENSG00000157680 (DGKI)	ENST00000453654	0.835384
hsa-miR-1246	DHX33	ENSG00000005100 (DHX33)	ENST00000225296	0.870048
hsa-miR-1246	DHX36	ENSG00000174953 (DHX36)	ENST00000496811	0.714093
hsa-miR-1246	DIO2	ENSG00000211448 (DIO2)	ENST00000438257	0.752674
hsa-miR-1246	DKC1	ENSG00000130826 (DKC1)	ENST00000369550	0.757542
hsa-miR-1246	DKFZP667F0711	ENSG00000212743 (DKFZP667F0711)	ENST00000391437	0.969552
hsa-miR-1246	DLD	ENSG00000091140 (DLD)	ENST00000205402	0.914989
hsa-miR-1246	DLG1	ENSG00000075711 (DLG1)	ENST00000357674	0.923106
hsa-miR-1246	DLG2	ENSG00000150672 (DLG2)	ENST00000398309	0.810347
hsa-miR-1246	DLG3	ENSG00000082458 (DLG3)	ENST00000374355	0.769217
hsa-miR-1246	DMRT2	ENSG00000173253 (DMRT2)	ENST00000259622	0.914654
hsa-miR-1246	DNAH3	ENSG00000158486 (DNAH3)	ENST00000415178	0.719308
hsa-miR-1246	DNAH8	ENSG00000124721 (DNAH8)	ENST00000449981	0.781257
hsa-miR-1246	DNAH9	ENSG00000007174 (DNAH9)	ENST00000579828	0.820892
hsa-miR-1246	DNAJB14	ENSG00000164031 (DNAJB14)	ENST00000442697	0.949234
hsa-miR-1246	DNAJC10	ENSG00000077232 (DNAJC10)	ENST00000264065	0.758867
hsa-miR-1246	DOK3	ENSG00000146094 (DOK3)	ENST00000312943	0.749803
hsa-miR-1246	DSCC1	ENSG00000136982 (DSCC1)	ENST00000313655	0.785934
hsa-miR-1246	DTL	ENSG00000143476 (DTL)	ENST00000366991	0.835598
hsa-miR-1246	DTNA	ENSG00000134769 (DTNA)	ENST00000283365	0.709813
hsa-miR-1246	DTNBP1	ENSG00000047579 (DTNBP1)	ENST00000506844	0.852286
hsa-miR-1246	DUSP18	ENSG00000167065 (DUSP18)	ENST00000403268	0.80765
hsa-miR-1246	DYNC1I1	ENSG00000158560 (DYNC1I1)	ENST00000359388	0.973449
hsa-miR-1246	DYRK1A	ENSG00000157540 (DYRK1A)	ENST00000339659	0.817122
hsa-miR-1246	DYRK2	ENSG00000127334 (DYRK2)	ENST00000344096	0.745207
hsa-miR-1246	E2F8	ENSG00000129173 (E2F8)	ENST00000527884	0.770315
hsa-miR-1246	EDA	ENSG00000158813 (EDA)	ENST00000374552	0.932032
hsa-miR-1246	EFCAB14	ENSG00000159658 (EFCAB14)	ENST00000371933	0.702016
hsa-miR-1246	EFHC2	ENSG00000183690 (EFHC2)	ENST00000420999	0.836934
hsa-miR-1246	EHF	ENSG00000135373 (EHF)	ENST00000257831	0.758799
hsa-miR-1246	EIF2AK3	ENSG00000172071 (EIF2AK3)	ENST00000419748	0.920974
hsa-miR-1246	EIF3F	ENSG00000175390 (EIF3F)	ENST00000533626	0.722071
hsa-miR-1246	EIF4E	ENSG00000151247 (EIF4E)	ENST00000450253	0.897423
hsa-miR-1246	EIF4EBP2	ENSG00000148730 (EIF4EBP2)	ENST00000373218	0.744527
hsa-miR-1246	EIF5B	ENSG00000158417 (EIF5B)	ENST00000289371	0.994068
hsa-miR-1246	ELMOD2	ENSG00000179387 (ELMOD2)	ENST00000323570	0.749203
hsa-miR-1246	ENDOV	ENSG00000173818 (ENDOV)	ENST00000517795	0.774138
hsa-miR-1246	ENOX2	ENSG00000165675 (ENOX2)	ENST00000370935	0.75057
hsa-miR-1246	ENSA	ENSG00000143420 (ENSA)	ENST00000271690	0.897484
hsa-miR-1246	ENTPD1	ENSG00000138185 (ENTPD1)	ENST00000371207	0.702928
hsa-miR-1246	EPHA4	ENSG00000116106 (EPHA4)	ENST00000281821	0.727809
hsa-miR-1246	EPM2AIP1	ENSG00000178567 (EPM2AIP1)	ENST00000322716	0.765504
hsa-miR-1246	ERBB4	ENSG00000178568 (ERBB4)	ENST00000342788	0.884921
hsa-miR-1246	ERO1LB	ENSG00000086619 (ERO1LB)	ENST00000354619	0.730935
hsa-miR-1246	ESM1	ENSG00000164283 (ESM1)	ENST00000381405	0.733973
hsa-miR-1246	EXOSC10	ENSG00000171824 (EXOSC10)	ENST00000544779	0.764644
hsa-miR-1246	EXOSC9	ENSG00000123737 (EXOSC9)	ENST00000513654	0.912571
hsa-miR-1246	EXPH5	ENSG00000110723 (EXPH5)	ENST00000265843	0.764925
hsa-miR-1246	F8A1	ENSG00000197932 (F8A1)	ENST00000369446	0.777037
hsa-miR-1246	F8A2	ENSG00000198444 (F8A2)	ENST00000369505	0.865331
hsa-miR-1246	F8A3	ENSG00000185990 (F8A3)	ENST00000369445	0.941594
hsa-miR-1246	FAM122B	ENSG00000156504 (FAM122B)	ENST00000370790	0.83434
hsa-miR-1246	FAM126B	ENSG00000155744 (FAM126B)	ENST00000418596	0.858473
hsa-miR-1246	FAM131B	ENSG00000159784 (FAM131B)	ENST00000410085	0.707223
hsa-miR-1246	FAM13B	ENSG00000031003 (FAM13B)	ENST00000033079	0.823514
hsa-miR-1246	FAM151B	ENSG00000152380 (FAM151B)	ENST00000282226	0.89589
hsa-miR-1246	FAM153A	ENSG00000170074 (FAM153A)	ENST00000360669	0.843673
hsa-miR-1246	FAM168A	ENSG00000054965 (FAM168A)	ENST00000064778	0.704869
hsa-miR-1246	FAM169B	ENSG00000185087 (FAM169B)	ENST00000558256	0.999184
hsa-miR-1246	FAM180A	ENSG00000189320 (FAM180A)	ENST00000338588	0.824786
hsa-miR-1246	FAM184A	ENSG00000111879 (FAM184A)	ENST00000522284	0.717828
hsa-miR-1246	FAM19A5	ENSG00000219438 (FAM19A5)	ENST00000358295	0.806936
hsa-miR-1246	FAM53C	ENSG00000120709 (FAM53C)	ENST00000239906	0.994387
hsa-miR-1246	FAM71C	ENSG00000180219 (FAM71C)	ENST00000324341	0.864745
hsa-miR-1246	FAM71D	ENSG00000172717 (FAM71D)	ENST00000556046	0.801357
hsa-miR-1246	FAM76B	ENSG00000077458 (FAM76B)	ENST00000398187	0.7565
hsa-miR-1246	FAM98A	ENSG00000119812 (FAM98A)	ENST00000403368	0.82377
hsa-miR-1246	FAXC	ENSG00000146267 (FAXC)	ENST00000389677	0.983893
hsa-miR-1246	FBXO10	ENSG00000147912 (FBXO10)	ENST00000276960	0.761011
hsa-miR-1246	FBXO28	ENSG00000143756 (FBXO28)	ENST00000366862	0.719567
hsa-miR-1246	FBXO3	ENSG00000110429 (FBXO3)	ENST00000530401	0.711552
hsa-miR-1246	FBXO42	ENSG00000037637 (FBXO42)	ENST00000375592	0.705048
hsa-miR-1246	FCRL3	ENSG00000160856 (FCRL3)	ENST00000368184	0.746731
hsa-miR-1246	FEM1B	ENSG00000169018 (FEM1B)	ENST00000306917	0.783647
hsa-miR-1246	FER	ENSG00000151422 (FER)	ENST00000281092	0.730037
hsa-miR-1246	FGF13	ENSG00000129682 (FGF13)	ENST00000305414	0.700204
hsa-miR-1246	FGF14	ENSG00000102466 (FGF14)	ENST00000376131	0.874657
hsa-miR-1246	FGF5	ENSG00000138675 (FGF5)	ENST00000456523	0.759909
hsa-miR-1246	FGFR1OP	ENSG00000213066 (FGFR1OP)	ENST00000366847	0.834351
hsa-miR-1246	FGGY	ENSG00000172456 (FGGY)	ENST00000430447	0.82558
hsa-miR-1246	FIGF	ENSG00000165197 (FIGF)	ENST00000297904	0.817763
hsa-miR-1246	FIGN	ENSG00000182263 (FIGN)	ENST00000333129	0.998264
hsa-miR-1246	FKBP1C	ENSG00000198225 (FKBP1C)	ENST00000370659	0.704082
hsa-miR-1246	FLI1	ENSG00000151702 (FLI1)	ENST00000429175	0.724931
hsa-miR-1246	FMN1	ENSG00000248905 (FMN1)	ENST00000334528	0.885132
hsa-miR-1246	FNDC3A	ENSG00000102531 (FNDC3A)	ENST00000484074	0.930173
hsa-miR-1246	FNIP2	ENSG00000052795 (FNIP2)	ENST00000264433	0.872514
hsa-miR-1246	FOPNL	ENSG00000133393 (FOPNL)	ENST00000255759	0.78184
hsa-miR-1246	FOXP2	ENSG00000128573 (FOXP2)	ENST00000441290	0.832218
hsa-miR-1246	FRK	ENSG00000111816 (FRK)	ENST00000606080	0.904914
hsa-miR-1246	FRMD3	ENSG00000172159 (FRMD3)	ENST00000304195	0.824774
hsa-miR-1246	FSTL5	ENSG00000168843 (FSTL5)	ENST00000306100	0.820941
hsa-miR-1246	FUT8	ENSG00000033170 (FUT8)	ENST00000360689	0.712018
hsa-miR-1246	FUT9	ENSG00000172461 (FUT9)	ENST00000302103	0.847687
hsa-miR-1246	FXR1	ENSG00000114416 (FXR1)	ENST00000357559	0.849148
hsa-miR-1246	FYB	ENSG00000082074 (FYB)	ENST00000351578	0.749149
hsa-miR-1246	FZD3	ENSG00000104290 (FZD3)	ENST00000240093	0.751033
hsa-miR-1246	FZD8	ENSG00000177283 (FZD8)	ENST00000374694	0.755467
hsa-miR-1246	GABRB3	ENSG00000166206 (GABRB3)	ENST00000311550	0.709296
hsa-miR-1246	GALNT11	ENSG00000178234 (GALNT11)	ENST00000415421	0.783441
hsa-miR-1246	GALNT15	ENSG00000131386 (GALNT15)	ENST00000339732	0.711296
hsa-miR-1246	GANC	ENSG00000214013 (GANC)	ENST00000318010	0.729753
hsa-miR-1246	GAS1	ENSG00000180447 (GAS1)	ENST00000298743	0.747322
hsa-miR-1246	GCFC2	ENSG00000005436 (GCFC2)	ENST00000541687	0.711979
hsa-miR-1246	GDAP1	ENSG00000104381 (GDAP1)	ENST00000220822	0.764359
hsa-miR-1246	GIGYF2	ENSG00000204120 (GIGYF2)	ENST00000373566	0.888844
hsa-miR-1246	GIMAP8	ENSG00000171115 (GIMAP8)	ENST00000307271	0.838536
hsa-miR-1246	GIN1	ENSG00000145723 (GIN1)	ENST00000512248	0.832171
hsa-miR-1246	GINS3	ENSG00000181938 (GINS3)	ENST00000318129	0.795062
hsa-miR-1246	GLIPR1L1	ENSG00000173401 (GLIPR1L1)	ENST00000312442	0.795935
hsa-miR-1246	GLRB	ENSG00000109738 (GLRB)	ENST00000541722	0.882309
hsa-miR-1246	GLTSCR1L	ENSG00000112624 (GLTSCR1L)	ENST00000314073	0.759944
hsa-miR-1246	GMCL1	ENSG00000087338 (GMCL1)	ENST00000282570	0.73952
hsa-miR-1246	GMFB	ENSG00000197045 (GMFB)	ENST00000554908	0.795545
hsa-miR-1246	GMNC	ENSG00000205835 (GMNC)	ENST00000442080	0.881457
hsa-miR-1246	GNAQ	ENSG00000156052 (GNAQ)	ENST00000286548	0.726948
hsa-miR-1246	GNRHR	ENSG00000109163 (GNRHR)	ENST00000226413	0.936485
hsa-miR-1246	GOLGA1	ENSG00000136935 (GOLGA1)	ENST00000475407	0.919435
hsa-miR-1246	GOLGA6L4	ENSG00000184206 (GOLGA6L4)	ENST00000510439	0.717103
hsa-miR-1246	GOLGB1	ENSG00000173230 (GOLGB1)	ENST00000482512	0.711923
hsa-miR-1246	GPALPP1	ENSG00000133114 (GPALPP1)	ENST00000497558	0.805016
hsa-miR-1246	GPATCH11	ENSG00000152133 (GPATCH11)	ENST00000281932	0.736006
hsa-miR-1246	GPATCH2L	ENSG00000089916 (GPATCH2L)	ENST00000261530	0.794881
hsa-miR-1246	GPC4	ENSG00000076716 (GPC4)	ENST00000370828	0.716322
hsa-miR-1246	GPC5	ENSG00000179399 (GPC5)	ENST00000377067	0.726867
hsa-miR-1246	GPR12	ENSG00000132975 (GPR12)	ENST00000405846	0.903732
hsa-miR-1246	GPR139	ENSG00000180269 (GPR139)	ENST00000326571	0.792188
hsa-miR-1246	GPR161	ENSG00000143147 (GPR161)	ENST00000367838	0.952842
hsa-miR-1246	GPR26	ENSG00000154478 (GPR26)	ENST00000284674	0.893617
hsa-miR-1246	GPR85	ENSG00000164604 (GPR85)	ENST00000297146	0.738906
hsa-miR-1246	GRHL1	ENSG00000134317 (GRHL1)	ENST00000405379	0.835206
hsa-miR-1246	GRIA1	ENSG00000155511 (GRIA1)	ENST00000285900	0.943188
hsa-miR-1246	GRIN2B	ENSG00000273079 (GRIN2B)	ENST00000609686	0.9712
hsa-miR-1246	GRM1	ENSG00000152822 (GRM1)	ENST00000492807	0.736177
hsa-miR-1246	GSG1L	ENSG00000169181 (GSG1L)	ENST00000380898	0.998313
hsa-miR-1246	GSK3B	ENSG00000082701 (GSK3B)	ENST00000264235	0.792441
hsa-miR-1246	GTF2H5	ENSG00000272047 (GTF2H5)	ENST00000607778	0.708361
hsa-miR-1246	GTF2I	ENSG00000077809 (GTF2I)	ENST00000416070	0.980184
hsa-miR-1246	GYS2	ENSG00000111713 (GYS2)	ENST00000261195	0.758902
hsa-miR-1246	H3F3A	ENSG00000163041 (H3F3A)	ENST00000366814	0.740044
hsa-miR-1246	HAUS6	ENSG00000147874 (HAUS6)	ENST00000380502	0.720291
hsa-miR-1246	HCCS	ENSG00000004961 (HCCS)	ENST00000321143	0.721014
hsa-miR-1246	HEBP2	ENSG00000051620 (HEBP2)	ENST00000607197	0.700365
hsa-miR-1246	HECTD2	ENSG00000165338 (HECTD2)	ENST00000371667	0.778559
hsa-miR-1246	HECW1	ENSG00000002746 (HECW1)	ENST00000395891	0.785851
hsa-miR-1246	HELZ	ENSG00000198265 (HELZ)	ENST00000358691	0.960321
hsa-miR-1246	HHIP	ENSG00000164161 (HHIP)	ENST00000296575	0.799155
hsa-miR-1246	HIPK1	ENSG00000163349 (HIPK1)	ENST00000369558	0.8867
hsa-miR-1246	HIPK2	ENSG00000064393 (HIPK2)	ENST00000406875	0.814082
hsa-miR-1246	HLF	ENSG00000108924 (HLF)	ENST00000226067	0.825117
hsa-miR-1246	HOPX	ENSG00000171476 (HOPX)	ENST00000554144	0.782601
hsa-miR-1246	HOXD13	ENSG00000128714 (HOXD13)	ENST00000392539	0.763281
hsa-miR-1246	HS3ST1	ENSG00000002587 (HS3ST1)	ENST00000002596	0.966102
hsa-miR-1246	HSPA4L	ENSG00000164070 (HSPA4L)	ENST00000296464	0.757419
hsa-miR-1246	IFT74	ENSG00000096872 (IFT74)	ENST00000429045	0.723671
hsa-miR-1246	IGJ	ENSG00000132465 (IGJ)	ENST00000254801	0.809951
hsa-miR-1246	INO80C	ENSG00000153391 (INO80C)	ENST00000592173	0.728196
hsa-miR-1246	INPP4B	ENSG00000109452 (INPP4B)	ENST00000513000	0.960159
hsa-miR-1246	INTU	ENSG00000164066 (INTU)	ENST00000335251	0.804279
hsa-miR-1246	IP6K1	ENSG00000176095 (IP6K1)	ENST00000321599	0.819104
hsa-miR-1246	IRAK2	ENSG00000134070 (IRAK2)	ENST00000256458	0.806105
hsa-miR-1246	IRS1	ENSG00000169047 (IRS1)	ENST00000305123	0.847965
hsa-miR-1246	ISCA1	ENSG00000135070 (ISCA1)	ENST00000375991	0.789124
hsa-miR-1246	ITGA1	ENSG00000213949 (ITGA1)	ENST00000282588	0.96026
hsa-miR-1246	ITGAV	ENSG00000138448 (ITGAV)	ENST00000261023	0.785853
hsa-miR-1246	ITSN2	ENSG00000198399 (ITSN2)	ENST00000416160	0.822205
hsa-miR-1246	IYD	ENSG00000009765 (IYD)	ENST00000344419	0.917065
hsa-miR-1246	JAKMIP2	ENSG00000176049 (JAKMIP2)	ENST00000507386	0.74572
hsa-miR-1246	JAM2	ENSG00000154721 (JAM2)	ENST00000480456	0.708094
hsa-miR-1246	JARID2	ENSG00000008083 (JARID2)	ENST00000341776	0.723796
hsa-miR-1246	KALRN	ENSG00000160145 (KALRN)	ENST00000291478	0.738996
hsa-miR-1246	KAT2B	ENSG00000114166 (KAT2B)	ENST00000263754	0.901349
hsa-miR-1246	KCNAB1	ENSG00000169282 (KCNAB1)	ENST00000302490	0.851051
hsa-miR-1246	KCNC1	ENSG00000129159 (KCNC1)	ENST00000379472	0.720582
hsa-miR-1246	KCNJ15	ENSG00000157551 (KCNJ15)	ENST00000328656	0.74369
hsa-miR-1246	KCNQ3	ENSG00000184156 (KCNQ3)	ENST00000388996	0.823893
hsa-miR-1246	KCNS3	ENSG00000170745 (KCNS3)	ENST00000304101	0.712746
hsa-miR-1246	KCTD16	ENSG00000183775 (KCTD16)	ENST00000507359	0.831478
hsa-miR-1246	KDM5A	ENSG00000073614 (KDM5A)	ENST00000399788	0.953291
hsa-miR-1246	KIAA0196	ENSG00000164961 (KIAA0196)	ENST00000318410	0.892856
hsa-miR-1246	KIAA0355	ENSG00000166398 (KIAA0355)	ENST00000299505	0.754504
hsa-miR-1246	KIAA0895	ENSG00000164542 (KIAA0895)	ENST00000297063	0.707646
hsa-miR-1246	KIAA1244	ENSG00000112379 (KIAA1244)	ENST00000251691	0.835944
hsa-miR-1246	KIAA1377	ENSG00000110318 (KIAA1377)	ENST00000263468	0.923819
hsa-miR-1246	KIAA1456	ENSG00000250305 (KIAA1456)	ENST00000524591	0.847468
hsa-miR-1246	KIAA1715	ENSG00000144320 (KIAA1715)	ENST00000272748	0.792923
hsa-miR-1246	KIF11	ENSG00000138160 (KIF11)	ENST00000260731	0.781345
hsa-miR-1246	KIF26B	ENSG00000162849 (KIF26B)	ENST00000366518	0.753412
hsa-miR-1246	KIRREL	ENSG00000183853 (KIRREL)	ENST00000368172	0.748573
hsa-miR-1246	KLC1	ENSG00000126214 (KLC1)	ENST00000389744	0.828628
hsa-miR-1246	KLHL1	ENSG00000150361 (KLHL1)	ENST00000377844	0.710397
hsa-miR-1246	KLHL14	ENSG00000197705 (KLHL14)	ENST00000359358	0.851483
hsa-miR-1246	KLHL15	ENSG00000174010 (KLHL15)	ENST00000328046	0.767701
hsa-miR-1246	KLHL42	ENSG00000087448 (KLHL42)	ENST00000381271	0.731554
hsa-miR-1246	KMT2C	ENSG00000055609 (KMT2C)	ENST00000558084	0.758111
hsa-miR-1246	KMT2D	ENSG00000167548 (KMT2D)	ENST00000301067	0.785102
hsa-miR-1246	KPNA4	ENSG00000186432 (KPNA4)	ENST00000334256	0.706588
hsa-miR-1246	KPNA5	ENSG00000196911 (KPNA5)	ENST00000368564	0.768159
hsa-miR-1246	KRR1	ENSG00000111615 (KRR1)	ENST00000229214	0.806668
hsa-miR-1246	KRTAP19-1	ENSG00000184351 (KRTAP19-1)	ENST00000390689	0.712594
hsa-miR-1246	KSR2	ENSG00000171435 (KSR2)	ENST00000425217	0.763362
hsa-miR-1246	LACE1	ENSG00000135537 (LACE1)	ENST00000368977	0.7251
hsa-miR-1246	LAMP2	ENSG00000005893 (LAMP2)	ENST00000371335	0.750899
hsa-miR-1246	LATS2	ENSG00000150457 (LATS2)	ENST00000382592	0.837708
hsa-miR-1246	LAX1	ENSG00000122188 (LAX1)	ENST00000442561	0.876514
hsa-miR-1246	LCOR	ENSG00000196233 (LCOR)	ENST00000540664	0.817355
hsa-miR-1246	LDB2	ENSG00000169744 (LDB2)	ENST00000502640	0.854561
hsa-miR-1246	LHFPL3	ENSG00000187416 (LHFPL3)	ENST00000535008	0.876793
hsa-miR-1246	LILRA4	ENSG00000239961 (LILRA4)	ENST00000291759	0.817684
hsa-miR-1246	LIN54	ENSG00000189308 (LIN54)	ENST00000395282	0.793941
hsa-miR-1246	LIN7A	ENSG00000111052 (LIN7A)	ENST00000552864	0.895129
hsa-miR-1246	LIN9	ENSG00000183814 (LIN9)	ENST00000460719	0.706622
hsa-miR-1246	LMAN2L	ENSG00000114988 (LMAN2L)	ENST00000434524	0.858507
hsa-miR-1246	LNPEP	ENSG00000113441 (LNPEP)	ENST00000231368	0.740353
hsa-miR-1246	LPIN2	ENSG00000101577 (LPIN2)	ENST00000261596	0.762466
hsa-miR-1246	LRCH3	ENSG00000186001 (LRCH3)	ENST00000438796	0.725816
hsa-miR-1246	LRFN5	ENSG00000165379 (LRFN5)	ENST00000554171	0.897371
hsa-miR-1246	LRIT2	ENSG00000204033 (LRIT2)	ENST00000372113	0.750831
hsa-miR-1246	LRMP	ENSG00000118308 (LRMP)	ENST00000361433	0.705177
hsa-miR-1246	LRRTM2	ENSG00000146006 (LRRTM2)	ENST00000274711	0.802982
hsa-miR-1246	LSS	ENSG00000160285 (LSS)	ENST00000397728	0.759507
hsa-miR-1246	LUZP2	ENSG00000187398 (LUZP2)	ENST00000533227	0.706707
hsa-miR-1246	LY75	ENSG00000054219 (LY75)	ENST00000263636	0.77493
hsa-miR-1246	MAGEA12	ENSG00000213401 (MAGEA12)	ENST00000357916	0.75073
hsa-miR-1246	MAGEA2	ENSG00000184750 (MAGEA2)	ENST00000370284	0.768667
hsa-miR-1246	MAGEA2B	ENSG00000183305 (MAGEA2B)	ENST00000370293	0.801174
hsa-miR-1246	MAGEA6	ENSG00000197172 (MAGEA6)	ENST00000329342	0.821468
hsa-miR-1246	MAGI2	ENSG00000187391 (MAGI2)	ENST00000419488	0.850732
hsa-miR-1246	MALT1	ENSG00000172175 (MALT1)	ENST00000348428	0.763294
hsa-miR-1246	MAN1A1	ENSG00000111885 (MAN1A1)	ENST00000368468	0.873951
hsa-miR-1246	MAN1A2	ENSG00000198162 (MAN1A2)	ENST00000356554	0.944948
hsa-miR-1246	MAP1B	ENSG00000131711 (MAP1B)	ENST00000296755	0.776607
hsa-miR-1246	MAP3K1	ENSG00000095015 (MAP3K1)	ENST00000399503	0.890419
hsa-miR-1246	MAP3K7CL	ENSG00000156265 (MAP3K7CL)	ENST00000286791	0.727939
hsa-miR-1246	MAPK1	ENSG00000100030 (MAPK1)	ENST00000215832	0.798267
hsa-miR-1246	MAX	ENSG00000125952 (MAX)	ENST00000284165	0.71195
hsa-miR-1246	MBD5	ENSG00000204406 (MBD5)	ENST00000416015	0.786761
hsa-miR-1246	MBNL2	ENSG00000139793 (MBNL2)	ENST00000345429	0.925749
hsa-miR-1246	MBNL3	ENSG00000076770 (MBNL3)	ENST00000538204	0.85424
hsa-miR-1246	MC2R	ENSG00000185231 (MC2R)	ENST00000327606	0.735925
hsa-miR-1246	MCCC1	ENSG00000078070 (MCCC1)	ENST00000497830	0.920759
hsa-miR-1246	MCCC2	ENSG00000131844 (MCCC2)	ENST00000340941	0.919718
hsa-miR-1246	MCTP1	ENSG00000175471 (MCTP1)	ENST00000515393	0.725983
hsa-miR-1246	MEF2C	ENSG00000081189 (MEF2C)	ENST00000340208	0.796751
hsa-miR-1246	MEGF10	ENSG00000145794 (MEGF10)	ENST00000503335	0.738615
hsa-miR-1246	MEIS1	ENSG00000143995 (MEIS1)	ENST00000488550	0.782346
hsa-miR-1246	MEIS3	ENSG00000105419 (MEIS3)	ENST00000559524	0.979558
hsa-miR-1246	METAP2	ENSG00000111142 (METAP2)	ENST00000323666	0.857973
hsa-miR-1246	MGA	ENSG00000174197 (MGA)	ENST00000219905	0.742835
hsa-miR-1246	MGAT4A	ENSG00000071073 (MGAT4A)	ENST00000393487	0.755314
hsa-miR-1246	MGME1	ENSG00000125871 (MGME1)	ENST00000377710	0.710914
hsa-miR-1246	MIA3	ENSG00000154305 (MIA3)	ENST00000344922	0.797244
hsa-miR-1246	MINA	ENSG00000170854 (MINA)	ENST00000333396	0.748034
hsa-miR-1246	MITF	ENSG00000187098 (MITF)	ENST00000328528	0.754207
hsa-miR-1246	MKKS	ENSG00000125863 (MKKS)	ENST00000347364	0.887786
hsa-miR-1246	MLLT3	ENSG00000171843 (MLLT3)	ENST00000380338	0.798691
hsa-miR-1246	MLTK	ENSG00000091436 (MLTK)	ENST00000338983	0.772148
hsa-miR-1246	MMP16	ENSG00000156103 (MMP16)	ENST00000286614	0.946369
hsa-miR-1246	MMP8	ENSG00000118113 (MMP8)	ENST00000528662	0.794684
hsa-miR-1246	MOB3B	ENSG00000120162 (MOB3B)	ENST00000262244	0.763281
hsa-miR-1246	MPZ	ENSG00000158887 (MPZ)	ENST00000533357	0.736424
hsa-miR-1246	MRI1	ENSG00000037757 (MRI1)	ENST00000319545	0.877496
hsa-miR-1246	MRPS18C	ENSG00000163319 (MRPS18C)	ENST00000295491	0.725927
hsa-miR-1246	MSANTD1	ENSG00000188981 (MSANTD1)	ENST00000505599	0.745446
hsa-miR-1246	MSN	ENSG00000147065 (MSN)	ENST00000360270	0.761858
hsa-miR-1246	MSR1	ENSG00000038945 (MSR1)	ENST00000350896	0.983641
hsa-miR-1246	MTERF	ENSG00000127989 (MTERF)	ENST00000419292	0.764788
hsa-miR-1246	MTMR9	ENSG00000104643 (MTMR9)	ENST00000221086	0.71057
hsa-miR-1246	MTPAP	ENSG00000107951 (MTPAP)	ENST00000358107	0.786504
hsa-miR-1246	MUT	ENSG00000146085 (MUT)	ENST00000274813	0.960746
hsa-miR-1246	MYOF	ENSG00000138119 (MYOF)	ENST00000463743	0.824805
hsa-miR-1246	NAA30	ENSG00000139977 (NAA30)	ENST00000556492	0.77123
hsa-miR-1246	NACC2	ENSG00000148411 (NACC2)	ENST00000371753	0.874699
hsa-miR-1246	NAMPT	ENSG00000105835 (NAMPT)	ENST00000222553	0.729083
hsa-miR-1246	NAPEPLD	ENSG00000161048 (NAPEPLD)	ENST00000417955	0.747438
hsa-miR-1246	NCAM1	ENSG00000149294 (NCAM1)	ENST00000316851	0.850598
hsa-miR-1246	NCAM2	ENSG00000154654 (NCAM2)	ENST00000400546	0.80486
hsa-miR-1246	NCAPG2	ENSG00000146918 (NCAPG2)	ENST00000432615	0.727582
hsa-miR-1246	NCKAP1	ENSG00000061676 (NCKAP1)	ENST00000361354	0.807651
hsa-miR-1246	NCOA7	ENSG00000111912 (NCOA7)	ENST00000444128	0.768668
hsa-miR-1246	NDFIP1	ENSG00000131507 (NDFIP1)	ENST00000253814	0.700435
hsa-miR-1246	NECAB1	ENSG00000123119 (NECAB1)	ENST00000417640	0.703655
hsa-miR-1246	NEK7	ENSG00000151414 (NEK7)	ENST00000367385	0.859936
hsa-miR-1246	NFAT5	ENSG00000102908 (NFAT5)	ENST00000426654	0.736753
hsa-miR-1246	NFE2L3	ENSG00000050344 (NFE2L3)	ENST00000056233	0.858501
hsa-miR-1246	NFIA	ENSG00000162599 (NFIA)	ENST00000403491	0.761372
hsa-miR-1246	NFIB	ENSG00000147862 (NFIB)	ENST00000380934	0.882829
hsa-miR-1246	NHLH2	ENSG00000177551 (NHLH2)	ENST00000320238	0.795131
hsa-miR-1246	NHLRC2	ENSG00000196865 (NHLRC2)	ENST00000369301	0.772689
hsa-miR-1246	NIPAL3	ENSG00000001461 (NIPAL3)	ENST00000003912	0.80964
hsa-miR-1246	NIPBL	ENSG00000164190 (NIPBL)	ENST00000282516	0.87266
hsa-miR-1246	NLRP3	ENSG00000162711 (NLRP3)	ENST00000391828	0.739439
hsa-miR-1246	NMRK1	ENSG00000106733 (NMRK1)	ENST00000494066	0.772546
hsa-miR-1246	NOVA1	ENSG00000139910 (NOVA1)	ENST00000483536	0.714949
hsa-miR-1246	NPAT	ENSG00000149308 (NPAT)	ENST00000278612	0.775751
hsa-miR-1246	NPFFR1	ENSG00000148734 (NPFFR1)	ENST00000277942	0.750261
hsa-miR-1246	NRIP1	ENSG00000180530 (NRIP1)	ENST00000400202	0.745732
hsa-miR-1246	NRK	ENSG00000123572 (NRK)	ENST00000243300	0.7897
hsa-miR-1246	NRXN1	ENSG00000179915 (NRXN1)	ENST00000342183	0.967896
hsa-miR-1246	NT5E	ENSG00000135318 (NT5E)	ENST00000369651	0.792321
hsa-miR-1246	NTRK2	ENSG00000148053 (NTRK2)	ENST00000376208	0.83884
hsa-miR-1246	NUDT4	ENSG00000173598 (NUDT4)	ENST00000415493	0.832964
hsa-miR-1246	NUP153	ENSG00000124789 (NUP153)	ENST00000262077	0.906114
hsa-miR-1246	NUP160	ENSG00000030066 (NUP160)	ENST00000378460	0.732554
hsa-miR-1246	NUP50	ENSG00000093000 (NUP50)	ENST00000347635	0.726502
hsa-miR-1246	NUTM2D	ENSG00000214562 (NUTM2D)	ENST00000412718	0.84863
hsa-miR-1246	OCRL	ENSG00000122126 (OCRL)	ENST00000357121	0.784218
hsa-miR-1246	OGN	ENSG00000106809 (OGN)	ENST00000375561	0.955181
hsa-miR-1246	ONECUT2	ENSG00000119547 (ONECUT2)	ENST00000491143	0.834033
hsa-miR-1246	ORC4	ENSG00000115947 (ORC4)	ENST00000392857	0.705019
hsa-miR-1246	OSBPL6	ENSG00000079156 (OSBPL6)	ENST00000190611	0.714525
hsa-miR-1246	PA2G4	ENSG00000170515 (PA2G4)	ENST00000303305	0.743985
hsa-miR-1246	PABPC4L	ENSG00000254535 (PABPC4L)	ENST00000529122	0.708833
hsa-miR-1246	PADI4	ENSG00000159339 (PADI4)	ENST00000375453	0.899936
hsa-miR-1246	PAIP2B	ENSG00000124374 (PAIP2B)	ENST00000244221	0.76706
hsa-miR-1246	PALM2-AKAP2	ENSG00000157654 (PALM2-AKAP2)	ENST00000374530	0.880323
hsa-miR-1246	PAPOLG	ENSG00000115421 (PAPOLG)	ENST00000412217	0.723494
hsa-miR-1246	PAQR3	ENSG00000163291 (PAQR3)	ENST00000512733	0.945975
hsa-miR-1246	PAQR5	ENSG00000137819 (PAQR5)	ENST00000395407	0.783197
hsa-miR-1246	PARD3B	ENSG00000116117 (PARD3B)	ENST00000406610	0.778523
hsa-miR-1246	PARP14	ENSG00000173193 (PARP14)	ENST00000460683	0.824321
hsa-miR-1246	PAWR	ENSG00000177425 (PAWR)	ENST00000328827	0.858279
hsa-miR-1246	PAX8	ENSG00000125618 (PAX8)	ENST00000397647	0.870286
hsa-miR-1246	PCBP2	ENSG00000197111 (PCBP2)	ENST00000550585	0.7215
hsa-miR-1246	PCDH19	ENSG00000165194 (PCDH19)	ENST00000373034	0.718127
hsa-miR-1246	PCDHA5	ENSG00000204965 (PCDHA5)	ENST00000529859	0.722045
hsa-miR-1246	PDE11A	ENSG00000128655 (PDE11A)	ENST00000286063	0.7109
hsa-miR-1246	PDE4DIP	ENSG00000178104 (PDE4DIP)	ENST00000529945	0.872898
hsa-miR-1246	PEAK1	ENSG00000173517 (PEAK1)	ENST00000312493	0.903711
hsa-miR-1246	PEG3	ENSG00000198300 (PEG3)	ENST00000423103	0.862044
hsa-miR-1246	PGAP1	ENSG00000197121 (PGAP1)	ENST00000423035	0.85747
hsa-miR-1246	PGM5	ENSG00000154330 (PGM5)	ENST00000396396	0.789905
hsa-miR-1246	PGR	ENSG00000082175 (PGR)	ENST00000325455	0.750533
hsa-miR-1246	PHC3	ENSG00000173889 (PHC3)	ENST00000495893	0.810011
hsa-miR-1246	PHLDA1	ENSG00000139289 (PHLDA1)	ENST00000266671	0.824295
hsa-miR-1246	PHLDB2	ENSG00000144824 (PHLDB2)	ENST00000477695	0.780911
hsa-miR-1246	PHYHIPL	ENSG00000165443 (PHYHIPL)	ENST00000373878	0.825245
hsa-miR-1246	PIK3AP1	ENSG00000155629 (PIK3AP1)	ENST00000339364	0.745464
hsa-miR-1246	PIK3C2A	ENSG00000011405 (PIK3C2A)	ENST00000265970	0.774232
hsa-miR-1246	PIK3CA	ENSG00000121879 (PIK3CA)	ENST00000263967	0.74927
hsa-miR-1246	PIK3CB	ENSG00000051382 (PIK3CB)	ENST00000462898	0.915475
hsa-miR-1246	PIP5K1B	ENSG00000107242 (PIP5K1B)	ENST00000478500	0.866478
hsa-miR-1246	PITPNM1	ENSG00000110697 (PITPNM1)	ENST00000436757	0.909538
hsa-miR-1246	PKN2	ENSG00000065243 (PKN2)	ENST00000370521	0.799012
hsa-miR-1246	PLAG1	ENSG00000181690 (PLAG1)	ENST00000316981	0.796513
hsa-miR-1246	PLAGL2	ENSG00000126003 (PLAGL2)	ENST00000246229	0.725062
hsa-miR-1246	PLCB4	ENSG00000101333 (PLCB4)	ENST00000378493	0.825917
hsa-miR-1246	PLCL2	ENSG00000154822 (PLCL2)	ENST00000418129	0.786066
hsa-miR-1246	PLCXD3	ENSG00000182836 (PLCXD3)	ENST00000377801	0.786057
hsa-miR-1246	PLEKHA3	ENSG00000116095 (PLEKHA3)	ENST00000234453	0.704414
hsa-miR-1246	PLEKHA7	ENSG00000166689 (PLEKHA7)	ENST00000355661	0.761601
hsa-miR-1246	PLEKHG2	ENSG00000090924 (PLEKHG2)	ENST00000425673	0.792559
hsa-miR-1246	PLEKHO2	ENSG00000241839 (PLEKHO2)	ENST00000323544	0.912008
hsa-miR-1246	PLGLB1	ENSG00000183281 (PLGLB1)	ENST00000355705	0.877813
hsa-miR-1246	PLGLB2	ENSG00000125551 (PLGLB2)	ENST00000359481	0.897735
hsa-miR-1246	PMP2	ENSG00000147588 (PMP2)	ENST00000256103	0.711248
hsa-miR-1246	PMS1	ENSG00000064933 (PMS1)	ENST00000342075	0.771107
hsa-miR-1246	POLA2	ENSG00000014138 (POLA2)	ENST00000527850	0.805081
hsa-miR-1246	POU2AF1	ENSG00000110777 (POU2AF1)	ENST00000393067	0.71151
hsa-miR-1246	PPHLN1	ENSG00000134283 (PPHLN1)	ENST00000432191	0.839025
hsa-miR-1246	PPIP5K2	ENSG00000145725 (PPIP5K2)	ENST00000321521	0.81452
hsa-miR-1246	PPM1L	ENSG00000163590 (PPM1L)	ENST00000498165	0.748452
hsa-miR-1246	PPP1CB	ENSG00000213639 (PPP1CB)	ENST00000395366	0.77834
hsa-miR-1246	PPP1R11	ENSG00000204619 (PPP1R11)	ENST00000376773	0.909091
hsa-miR-1246	PPP1R9B	ENSG00000108819 (PPP1R9B)	ENST00000316878	0.749596
hsa-miR-1246	PPP2CB	ENSG00000104695 (PPP2CB)	ENST00000221138	0.770496
hsa-miR-1246	PPP2R2B	ENSG00000156475 (PPP2R2B)	ENST00000394413	0.705163
hsa-miR-1246	PPP2R3A	ENSG00000073711 (PPP2R3A)	ENST00000264977	0.70306
hsa-miR-1246	PPP2R3C	ENSG00000092020 (PPP2R3C)	ENST00000554222	0.799721
hsa-miR-1246	PPTC7	ENSG00000196850 (PPTC7)	ENST00000354300	0.821176
hsa-miR-1246	PRELP	ENSG00000188783 (PRELP)	ENST00000343110	0.788227
hsa-miR-1246	PREX2	ENSG00000046889 (PREX2)	ENST00000288368	0.960515
hsa-miR-1246	PRICKLE2	ENSG00000163637 (PRICKLE2)	ENST00000295902	0.892798
hsa-miR-1246	PRKAA2	ENSG00000162409 (PRKAA2)	ENST00000371244	0.755593
hsa-miR-1246	PRKACA	ENSG00000072062 (PRKACA)	ENST00000308677	0.76033
hsa-miR-1246	PRKACB	ENSG00000142875 (PRKACB)	ENST00000394839	0.735392
hsa-miR-1246	PRLR	ENSG00000113494 (PRLR)	ENST00000342362	0.883705
hsa-miR-1246	PRRG1	ENSG00000130962 (PRRG1)	ENST00000378628	0.9023
hsa-miR-1246	PRSS37	ENSG00000165076 (PRSS37)	ENST00000419085	0.724431
hsa-miR-1246	PSD3	ENSG00000156011 (PSD3)	ENST00000327040	0.941196
hsa-miR-1246	PSG3	ENSG00000221826 (PSG3)	ENST00000594378	0.716667
hsa-miR-1246	PSIP1	ENSG00000164985 (PSIP1)	ENST00000380733	0.856614
hsa-miR-1246	PSMA5	ENSG00000143106 (PSMA5)	ENST00000271308	0.83137
hsa-miR-1246	PSMD12	ENSG00000197170 (PSMD12)	ENST00000356126	0.717665
hsa-miR-1246	PTAR1	ENSG00000188647 (PTAR1)	ENST00000377200	0.878127
hsa-miR-1246	PTCH1	ENSG00000185920 (PTCH1)	ENST00000375290	0.770382
hsa-miR-1246	PTEN	ENSG00000171862 (PTEN)	ENST00000371953	0.73726
hsa-miR-1246	PTGR1	ENSG00000106853 (PTGR1)	ENST00000374324	0.809297
hsa-miR-1246	PTPLAD2	ENSG00000188921 (PTPLAD2)	ENST00000495827	0.94064
hsa-miR-1246	PTPN4	ENSG00000088179 (PTPN4)	ENST00000263708	0.717001
hsa-miR-1246	PTPRD	ENSG00000153707 (PTPRD)	ENST00000381196	0.8865
hsa-miR-1246	PURB	ENSG00000146676 (PURB)	ENST00000395699	0.908875
hsa-miR-1246	PXN	ENSG00000089159 (PXN)	ENST00000228307	0.71205
hsa-miR-1246	PYGO1	ENSG00000171016 (PYGO1)	ENST00000302000	0.873361
hsa-miR-1246	QTRTD1	ENSG00000151576 (QTRTD1)	ENST00000281273	0.753405
hsa-miR-1246	RAB14	ENSG00000119396 (RAB14)	ENST00000373840	0.83849
hsa-miR-1246	RAB18	ENSG00000099246 (RAB18)	ENST00000356940	0.852295
hsa-miR-1246	RAB30	ENSG00000137502 (RAB30)	ENST00000533486	0.792674
hsa-miR-1246	RAD1	ENSG00000113456 (RAD1)	ENST00000382038	0.724059
hsa-miR-1246	RAD51L3-RFFL	ENSG00000267618 (RAD51L3-RFFL)	ENST00000593039	0.73575
hsa-miR-1246	RAD9B	ENSG00000151164 (RAD9B)	ENST00000358071	0.826339
hsa-miR-1246	RAP2C	ENSG00000123728 (RAP2C)	ENST00000342983	0.721161
hsa-miR-1246	RAPGEF2	ENSG00000109756 (RAPGEF2)	ENST00000264431	0.758065
hsa-miR-1246	RASA1	ENSG00000145715 (RASA1)	ENST00000515800	0.916615
hsa-miR-1246	RASA2	ENSG00000155903 (RASA2)	ENST00000286364	0.875336
hsa-miR-1246	RAVER2	ENSG00000162437 (RAVER2)	ENST00000371072	0.71464
hsa-miR-1246	RBBP9	ENSG00000089050 (RBBP9)	ENST00000337227	0.891746
hsa-miR-1246	RBL1	ENSG00000080839 (RBL1)	ENST00000373664	0.771317
hsa-miR-1246	RBM26	ENSG00000139746 (RBM26)	ENST00000449987	0.913378
hsa-miR-1246	RC3H2	ENSG00000056586 (RC3H2)	ENST00000373670	0.897111
hsa-miR-1246	RCAN3	ENSG00000117602 (RCAN3)	ENST00000374395	0.856538
hsa-miR-1246	RCBTB1	ENSG00000136144 (RCBTB1)	ENST00000258646	0.707227
hsa-miR-1246	RDX	ENSG00000137710 (RDX)	ENST00000343115	0.808498
hsa-miR-1246	REL	ENSG00000162924 (REL)	ENST00000295025	0.801012
hsa-miR-1246	REPS2	ENSG00000169891 (REPS2)	ENST00000357277	0.871814
hsa-miR-1246	RERE	ENSG00000142599 (RERE)	ENST00000337907	0.814912
hsa-miR-1246	REV3L	ENSG00000009413 (REV3L)	ENST00000434009	0.922117
hsa-miR-1246	REXO1L1P	ENSG00000205176 (REXO1L1P)	ENST00000379010	0.751584
hsa-miR-1246	RGS17	ENSG00000091844 (RGS17)	ENST00000367225	0.785762
hsa-miR-1246	RGS5	ENSG00000143248 (RGS5)	ENST00000313961	0.775595
hsa-miR-1246	RGS7BP	ENSG00000186479 (RGS7BP)	ENST00000334025	0.801604
hsa-miR-1246	RGS8	ENSG00000135824 (RGS8)	ENST00000483095	0.79461
hsa-miR-1246	RIMBP2	ENSG00000060709 (RIMBP2)	ENST00000261655	0.735581
hsa-miR-1246	RNF11	ENSG00000123091 (RNF11)	ENST00000242719	0.718687
hsa-miR-1246	RNF141	ENSG00000110315 (RNF141)	ENST00000265981	0.781254
hsa-miR-1246	RNF150	ENSG00000170153 (RNF150)	ENST00000515673	0.803273
hsa-miR-1246	RNF168	ENSG00000163961 (RNF168)	ENST00000318037	0.739477
hsa-miR-1246	RNF182	ENSG00000180537 (RNF182)	ENST00000488300	0.790313
hsa-miR-1246	RNF4	ENSG00000063978 (RNF4)	ENST00000541204	0.705886
hsa-miR-1246	RORA	ENSG00000069667 (RORA)	ENST00000335670	0.917935
hsa-miR-1246	RP11-146D12.2	ENSG00000240240 (RP11-146D12.2)	ENST00000421686	0.712128
hsa-miR-1246	RP11-637O19.3	ENSG00000272162 (RP11-637O19.3)	ENST00000480294	0.79881
hsa-miR-1246	RP11-664D7.4	ENSG00000248801 (RP11-664D7.4)	ENST00000512294	0.764206
hsa-miR-1246	RP11-73M18.2	ENSG00000256500 (RP11-73M18.2)	ENST00000472726	0.835364
hsa-miR-1246	RPGRIP1L	ENSG00000103494 (RPGRIP1L)	ENST00000262135	0.895566
hsa-miR-1246	RRAGD	ENSG00000025039 (RRAGD)	ENST00000369415	0.791296
hsa-miR-1246	RRN3	ENSG00000085721 (RRN3)	ENST00000198767	0.768097
hsa-miR-1246	RSBN1	ENSG00000081019 (RSBN1)	ENST00000261441	0.770217
hsa-miR-1246	RSF1	ENSG00000048649 (RSF1)	ENST00000308488	0.723037
hsa-miR-1246	RSPH3	ENSG00000130363 (RSPH3)	ENST00000367069	0.75766
hsa-miR-1246	RTKN2	ENSG00000182010 (RTKN2)	ENST00000373789	0.949298
hsa-miR-1246	RUFY4	ENSG00000188282 (RUFY4)	ENST00000457754	0.709334
hsa-miR-1246	RYBP	ENSG00000163602 (RYBP)	ENST00000477973	0.853151
hsa-miR-1246	RYR2	ENSG00000198626 (RYR2)	ENST00000366574	0.776127
hsa-miR-1246	SCAI	ENSG00000173611 (SCAI)	ENST00000336505	0.863375
hsa-miR-1246	SCN3A	ENSG00000153253 (SCN3A)	ENST00000360093	0.934251
hsa-miR-1246	SDAD1	ENSG00000198301 (SDAD1)	ENST00000395710	0.738179
hsa-miR-1246	SEC14L5	ENSG00000103184 (SEC14L5)	ENST00000251170	0.761819
hsa-miR-1246	SEC63	ENSG00000025796 (SEC63)	ENST00000369002	0.86794
hsa-miR-1246	SEMA3A	ENSG00000075213 (SEMA3A)	ENST00000265362	0.903317
hsa-miR-1246	SEMA6A	ENSG00000092421 (SEMA6A)	ENST00000343348	0.818296
hsa-miR-1246	SEMA6D	ENSG00000137872 (SEMA6D)	ENST00000355997	0.868526
hsa-miR-1246	SENP1	ENSG00000079387 (SENP1)	ENST00000552189	0.860969
hsa-miR-1246	SEPHS1	ENSG00000086475 (SEPHS1)	ENST00000327347	0.723993
hsa-miR-1246	SERAC1	ENSG00000122335 (SERAC1)	ENST00000607742	0.868988
hsa-miR-1246	SERPIND1	ENSG00000099937 (SERPIND1)	ENST00000215727	0.807693
hsa-miR-1246	SETDB2	ENSG00000136169 (SETDB2)	ENST00000354234	0.757135
hsa-miR-1246	SFT2D2	ENSG00000213064 (SFT2D2)	ENST00000271375	0.955421
hsa-miR-1246	SGPP1	ENSG00000126821 (SGPP1)	ENST00000247225	0.715015
hsa-miR-1246	SH2B3	ENSG00000111252 (SH2B3)	ENST00000341259	0.708737
hsa-miR-1246	SH3BP2	ENSG00000087266 (SH3BP2)	ENST00000356331	0.707825
hsa-miR-1246	SH3RF2	ENSG00000156463 (SH3RF2)	ENST00000511217	0.734851
hsa-miR-1246	SHC4	ENSG00000185634 (SHC4)	ENST00000332408	0.828226
hsa-miR-1246	SHISA9	ENSG00000237515 (SHISA9)	ENST00000558583	0.864347
hsa-miR-1246	SHOX	ENSG00000185960 (SHOX)	ENST00000381578	0.7746
hsa-miR-1246	SIAE	ENSG00000110013 (SIAE)	ENST00000263593	0.900729
hsa-miR-1246	SIAH3	ENSG00000215475 (SIAH3)	ENST00000400405	0.799886
hsa-miR-1246	SIKE1	ENSG00000052723 (SIKE1)	ENST00000369528	0.796899
hsa-miR-1246	SKIL	ENSG00000136603 (SKIL)	ENST00000458537	0.967871
hsa-miR-1246	SLAIN1	ENSG00000139737 (SLAIN1)	ENST00000351546	0.876718
hsa-miR-1246	SLC12A2	ENSG00000064651 (SLC12A2)	ENST00000262461	0.91161
hsa-miR-1246	SLC16A7	ENSG00000118596 (SLC16A7)	ENST00000261187	0.75674
hsa-miR-1246	SLC17A6	ENSG00000091664 (SLC17A6)	ENST00000263160	0.722869
hsa-miR-1246	SLC17A8	ENSG00000179520 (SLC17A8)	ENST00000323346	0.905106
hsa-miR-1246	SLC25A53	ENSG00000176274 (SLC25A53)	ENST00000357421	0.773515
hsa-miR-1246	SLC26A3	ENSG00000091138 (SLC26A3)	ENST00000379083	0.759003
hsa-miR-1246	SLC28A2	ENSG00000137860 (SLC28A2)	ENST00000559924	0.779877
hsa-miR-1246	SLC28A3	ENSG00000197506 (SLC28A3)	ENST00000376238	0.835888
hsa-miR-1246	SLC35F1	ENSG00000196376 (SLC35F1)	ENST00000360388	0.767662
hsa-miR-1246	SLC35G1	ENSG00000176273 (SLC35G1)	ENST00000483386	0.765187
hsa-miR-1246	SLC37A3	ENSG00000157800 (SLC37A3)	ENST00000477571	0.724557
hsa-miR-1246	SLC38A2	ENSG00000134294 (SLC38A2)	ENST00000549258	0.935075
hsa-miR-1246	SLC39A10	ENSG00000196950 (SLC39A10)	ENST00000430412	0.706428
hsa-miR-1246	SLC39A9	ENSG00000029364 (SLC39A9)	ENST00000031146	0.717114
hsa-miR-1246	SLC41A2	ENSG00000136052 (SLC41A2)	ENST00000258538	0.823122
hsa-miR-1246	SLC8A1	ENSG00000183023 (SLC8A1)	ENST00000406785	0.726055
hsa-miR-1246	SLFN5	ENSG00000166750 (SLFN5)	ENST00000299977	0.863788
hsa-miR-1246	SLITRK4	ENSG00000179542 (SLITRK4)	ENST00000381779	0.727848
hsa-miR-1246	SMAD4	ENSG00000141646 (SMAD4)	ENST00000398417	0.751217
hsa-miR-1246	SMCO1	ENSG00000214097 (SMCO1)	ENST00000452776	0.916456
hsa-miR-1246	SMG7	ENSG00000116698 (SMG7)	ENST00000367537	0.965623
hsa-miR-1246	SNAPC5	ENSG00000174446 (SNAPC5)	ENST00000568875	0.714489
hsa-miR-1246	SOAT1	ENSG00000057252 (SOAT1)	ENST00000367619	0.784869
hsa-miR-1246	SOCS4	ENSG00000180008 (SOCS4)	ENST00000395472	0.844224
hsa-miR-1246	SORL1	ENSG00000137642 (SORL1)	ENST00000260197	0.88108
hsa-miR-1246	SOS1	ENSG00000115904 (SOS1)	ENST00000426016	0.722493
hsa-miR-1246	SOX2	ENSG00000181449 (SOX2)	ENST00000325404	0.914521
hsa-miR-1246	SPA17	ENSG00000064199 (SPA17)	ENST00000532692	0.90844
hsa-miR-1246	SPAM1	ENSG00000106304 (SPAM1)	ENST00000340011	0.765885
hsa-miR-1246	SPATA17	ENSG00000162814 (SPATA17)	ENST00000366933	0.845561
hsa-miR-1246	SPATA32	ENSG00000184361 (SPATA32)	ENST00000586359	0.990749
hsa-miR-1246	SPATS1	ENSG00000249481 (SPATS1)	ENST00000506468	0.721194
hsa-miR-1246	SPATS2L	ENSG00000196141 (SPATS2L)	ENST00000358677	0.769231
hsa-miR-1246	SPOCK2	ENSG00000107742 (SPOCK2)	ENST00000373109	0.729923
hsa-miR-1246	SPTBN1	ENSG00000115306 (SPTBN1)	ENST00000333896	0.792402
hsa-miR-1246	SPTY2D1	ENSG00000179119 (SPTY2D1)	ENST00000336349	0.880307
hsa-miR-1246	SRPK2	ENSG00000135250 (SRPK2)	ENST00000393651	0.93291
hsa-miR-1246	SS18L2	ENSG00000008324 (SS18L2)	ENST00000447630	0.751134
hsa-miR-1246	ST8SIA6	ENSG00000148488 (ST8SIA6)	ENST00000377602	0.782997
hsa-miR-1246	STARD5	ENSG00000172345 (STARD5)	ENST00000302824	0.890986
hsa-miR-1246	STC1	ENSG00000159167 (STC1)	ENST00000290271	0.764676
hsa-miR-1246	STOX2	ENSG00000173320 (STOX2)	ENST00000308497	0.748763
hsa-miR-1246	STYX	ENSG00000198252 (STYX)	ENST00000354586	0.84701
hsa-miR-1246	SVEP1	ENSG00000165124 (SVEP1)	ENST00000401783	0.704855
hsa-miR-1246	SYCP2L	ENSG00000153157 (SYCP2L)	ENST00000341041	0.900291
hsa-miR-1246	SYT14	ENSG00000143469 (SYT14)	ENST00000399639	0.914505
hsa-miR-1246	SYTL2	ENSG00000137501 (SYTL2)	ENST00000389959	0.723717
hsa-miR-1246	TAF9B	ENSG00000187325 (TAF9B)	ENST00000341864	0.762973
hsa-miR-1246	TAOK1	ENSG00000160551 (TAOK1)	ENST00000261716	0.926408
hsa-miR-1246	TBC1D23	ENSG00000036054 (TBC1D23)	ENST00000344949	0.731424
hsa-miR-1246	TBC1D31	ENSG00000156787 (TBC1D31)	ENST00000524307	0.734899
hsa-miR-1246	TBCA	ENSG00000171530 (TBCA)	ENST00000306388	0.826263
hsa-miR-1246	TBR1	ENSG00000136535 (TBR1)	ENST00000389554	0.759138
hsa-miR-1246	TC2N	ENSG00000165929 (TC2N)	ENST00000435962	0.728264
hsa-miR-1246	TCN1	ENSG00000134827 (TCN1)	ENST00000257264	0.738795
hsa-miR-1246	TCP11	ENSG00000124678 (TCP11)	ENST00000504758	0.796258
hsa-miR-1246	TEAD1	ENSG00000187079 (TEAD1)	ENST00000361905	0.901761
hsa-miR-1246	TET1	ENSG00000138336 (TET1)	ENST00000373644	0.802237
hsa-miR-1246	TET2	ENSG00000168769 (TET2)	ENST00000545826	0.808816
hsa-miR-1246	TGFA	ENSG00000163235 (TGFA)	ENST00000295400	0.752909
hsa-miR-1246	THADA	ENSG00000115970 (THADA)	ENST00000398653	0.812758
hsa-miR-1246	THSD7A	ENSG00000005108 (THSD7A)	ENST00000423059	0.839513
hsa-miR-1246	TM2D3	ENSG00000184277 (TM2D3)	ENST00000560013	0.725284
hsa-miR-1246	TM4SF18	ENSG00000163762 (TM4SF18)	ENST00000296059	0.756561
hsa-miR-1246	TM9SF2	ENSG00000125304 (TM9SF2)	ENST00000376387	0.827431
hsa-miR-1246	TM9SF3	ENSG00000077147 (TM9SF3)	ENST00000371142	0.709257
hsa-miR-1246	TMEM123	ENSG00000152558 (TMEM123)	ENST00000361236	0.785811
hsa-miR-1246	TMEM130	ENSG00000166448 (TMEM130)	ENST00000416379	0.806315
hsa-miR-1246	TMEM132B	ENSG00000139364 (TMEM132B)	ENST00000299308	0.739272
hsa-miR-1246	TMEM132C	ENSG00000181234 (TMEM132C)	ENST00000435159	0.735656
hsa-miR-1246	TMEM132D	ENSG00000151952 (TMEM132D)	ENST00000389441	0.827173
hsa-miR-1246	TMEM182	ENSG00000170417 (TMEM182)	ENST00000412401	0.736517
hsa-miR-1246	TMEM184A	ENSG00000164855 (TMEM184A)	ENST00000297477	0.912064
hsa-miR-1246	TMEM189-UBE2V1	ENSG00000124208 (TMEM189-UBE2V1)	ENST00000341698	0.730233
hsa-miR-1246	TMEM194A	ENSG00000166881 (TMEM194A)	ENST00000379391	0.761749
hsa-miR-1246	TMEM242	ENSG00000215712 (TMEM242)	ENST00000400788	0.818473
hsa-miR-1246	TMEM260	ENSG00000070269 (TMEM260)	ENST00000556422	0.859447
hsa-miR-1246	TMEM261	ENSG00000137038 (TMEM261)	ENST00000358227	0.702842
hsa-miR-1246	TMEM33	ENSG00000109133 (TMEM33)	ENST00000504986	0.896107
hsa-miR-1246	TMEM55A	ENSG00000155099 (TMEM55A)	ENST00000285419	0.948662
hsa-miR-1246	TMTC3	ENSG00000139324 (TMTC3)	ENST00000266712	0.734981
hsa-miR-1246	TNFRSF10A	ENSG00000104689 (TNFRSF10A)	ENST00000221132	0.723674
hsa-miR-1246	TNFRSF11A	ENSG00000141655 (TNFRSF11A)	ENST00000586569	0.70501
hsa-miR-1246	TNFSF18	ENSG00000120337 (TNFSF18)	ENST00000239468	0.740782
hsa-miR-1246	TNKS2	ENSG00000107854 (TNKS2)	ENST00000371627	0.714375
hsa-miR-1246	TNRC6A	ENSG00000090905 (TNRC6A)	ENST00000491718	0.857838
hsa-miR-1246	TRIP12	ENSG00000153827 (TRIP12)	ENST00000283943	0.806161
hsa-miR-1246	TROVE2	ENSG00000116747 (TROVE2)	ENST00000432079	0.825008
hsa-miR-1246	TRPS1	ENSG00000104447 (TRPS1)	ENST00000395715	0.711316
hsa-miR-1246	TSHZ2	ENSG00000182463 (TSHZ2)	ENST00000371497	0.927383
hsa-miR-1246	TSPAN16	ENSG00000130167 (TSPAN16)	ENST00000337994	0.720028
hsa-miR-1246	TSPYL1	ENSG00000189241 (TSPYL1)	ENST00000368608	0.709292
hsa-miR-1246	TSPYL4	ENSG00000187189 (TSPYL4)	ENST00000420283	0.75093
hsa-miR-1246	TSTD2	ENSG00000136925 (TSTD2)	ENST00000341170	0.910258
hsa-miR-1246	TTC5	ENSG00000136319 (TTC5)	ENST00000258821	0.918666
hsa-miR-1246	TTL	ENSG00000114999 (TTL)	ENST00000233336	0.849162
hsa-miR-1246	TUSC3	ENSG00000104723 (TUSC3)	ENST00000382020	0.739119
hsa-miR-1246	TWSG1	ENSG00000128791 (TWSG1)	ENST00000262120	0.728496
hsa-miR-1246	TXNDC8	ENSG00000204193 (TXNDC8)	ENST00000374507	0.784249
hsa-miR-1246	TXNL1	ENSG00000091164 (TXNL1)	ENST00000217515	0.9117
hsa-miR-1246	UBASH3B	ENSG00000154127 (UBASH3B)	ENST00000284273	0.700947
hsa-miR-1246	UBE2A	ENSG00000077721 (UBE2A)	ENST00000371569	0.726194
hsa-miR-1246	UBE2D2	ENSG00000131508 (UBE2D2)	ENST00000398733	0.715502
hsa-miR-1246	UBE2D3	ENSG00000109332 (UBE2D3)	ENST00000453744	0.734745
hsa-miR-1246	UBE2G1	ENSG00000132388 (UBE2G1)	ENST00000396981	0.824436
hsa-miR-1246	UBE2H	ENSG00000186591 (UBE2H)	ENST00000355621	0.775925
hsa-miR-1246	UBE2V1	ENSG00000244687 (UBE2V1)	ENST00000371677	0.73101
hsa-miR-1246	UBE2Z	ENSG00000159202 (UBE2Z)	ENST00000360943	0.798774
hsa-miR-1246	UBN2	ENSG00000157741 (UBN2)	ENST00000473989	0.81226
hsa-miR-1246	UBXN10	ENSG00000162543 (UBXN10)	ENST00000375099	0.793767
hsa-miR-1246	UFL1	ENSG00000014123 (UFL1)	ENST00000369278	0.785028
hsa-miR-1246	UGGT1	ENSG00000136731 (UGGT1)	ENST00000376723	0.705446
hsa-miR-1246	UGT1A8	ENSG00000241635 (UGT1A8)	ENST00000360418	0.787986
hsa-miR-1246	UHMK1	ENSG00000152332 (UHMK1)	ENST00000538489	0.779823
hsa-miR-1246	UNC5B	ENSG00000107731 (UNC5B)	ENST00000335350	0.873702
hsa-miR-1246	USO1	ENSG00000138768 (USO1)	ENST00000441296	0.715241
hsa-miR-1246	USP34	ENSG00000115464 (USP34)	ENST00000453133	0.776317
hsa-miR-1246	USP48	ENSG00000090686 (USP48)	ENST00000400301	0.765067
hsa-miR-1246	USP49	ENSG00000164663 (USP49)	ENST00000394253	0.973225
hsa-miR-1246	USP6NL	ENSG00000148429 (USP6NL)	ENST00000609104	0.746054
hsa-miR-1246	USP7	ENSG00000187555 (USP7)	ENST00000563961	0.735696
hsa-miR-1246	UTRN	ENSG00000152818 (UTRN)	ENST00000367545	0.817666
hsa-miR-1246	VIM	ENSG00000026025 (VIM)	ENST00000469543	0.843889
hsa-miR-1246	VKORC1L1	ENSG00000196715 (VKORC1L1)	ENST00000360768	0.837697
hsa-miR-1246	VPS35	ENSG00000069329 (VPS35)	ENST00000299138	0.746962
hsa-miR-1246	VPS45	ENSG00000136631 (VPS45)	ENST00000369130	0.886448
hsa-miR-1246	VPS53	ENSG00000141252 (VPS53)	ENST00000437048	0.869838
hsa-miR-1246	VSIG10	ENSG00000176834 (VSIG10)	ENST00000359236	0.757457
hsa-miR-1246	VTA1	ENSG00000009844 (VTA1)	ENST00000367630	0.718294
hsa-miR-1246	VWA3B	ENSG00000168658 (VWA3B)	ENST00000432242	0.710833
hsa-miR-1246	WAC	ENSG00000095787 (WAC)	ENST00000375664	0.866807
hsa-miR-1246	WASF3	ENSG00000132970 (WASF3)	ENST00000335327	0.812835
hsa-miR-1246	WDR3	ENSG00000065183 (WDR3)	ENST00000349139	0.824985
hsa-miR-1246	WDR77	ENSG00000116455 (WDR77)	ENST00000235090	0.82761
hsa-miR-1246	WDR78	ENSG00000152763 (WDR78)	ENST00000491297	0.74008
hsa-miR-1246	WNT2B	ENSG00000134245 (WNT2B)	ENST00000369686	0.75086
hsa-miR-1246	WT1	ENSG00000184937 (WT1)	ENST00000379077	0.717811
hsa-miR-1246	XIAP	ENSG00000101966 (XIAP)	ENST00000371199	0.702671
hsa-miR-1246	XK	ENSG00000047597 (XK)	ENST00000378616	0.719486
hsa-miR-1246	XKR4	ENSG00000206579 (XKR4)	ENST00000327381	0.934802
hsa-miR-1246	XPNPEP3	ENSG00000196236 (XPNPEP3)	ENST00000357137	0.733333
hsa-miR-1246	YIPF6	ENSG00000181704 (YIPF6)	ENST00000462683	0.838501
hsa-miR-1246	YTHDF3	ENSG00000185728 (YTHDF3)	ENST00000524135	0.946635
hsa-miR-1246	ZBTB1	ENSG00000126804 (ZBTB1)	ENST00000358738	0.719283
hsa-miR-1246	ZBTB21	ENSG00000173276 (ZBTB21)	ENST00000310826	0.845666
hsa-miR-1246	ZBTB37	ENSG00000185278 (ZBTB37)	ENST00000367701	0.756149
hsa-miR-1246	ZBTB39	ENSG00000166860 (ZBTB39)	ENST00000300101	0.725203
hsa-miR-1246	ZC3H12B	ENSG00000102053 (ZC3H12B)	ENST00000338957	0.858053
hsa-miR-1246	ZC3H12C	ENSG00000149289 (ZC3H12C)	ENST00000278590	0.883782
hsa-miR-1246	ZCCHC6	ENSG00000083223 (ZCCHC6)	ENST00000277141	0.90221
hsa-miR-1246	ZFP36L1	ENSG00000185650 (ZFP36L1)	ENST00000555997	0.810842
hsa-miR-1246	ZFP42	ENSG00000179059 (ZFP42)	ENST00000326866	0.733065
hsa-miR-1246	ZFP69B	ENSG00000187801 (ZFP69B)	ENST00000484445	0.91972
hsa-miR-1246	ZFY	ENSG00000067646 (ZFY)	ENST00000383052	0.712868
hsa-miR-1246	ZIC2	ENSG00000043355 (ZIC2)	ENST00000376335	0.868896
hsa-miR-1246	ZKSCAN2	ENSG00000155592 (ZKSCAN2)	ENST00000328086	0.854934
hsa-miR-1246	ZKSCAN3	ENSG00000189298 (ZKSCAN3)	ENST00000377255	0.96087
hsa-miR-1246	ZKSCAN7	ENSG00000196345 (ZKSCAN7)	ENST00000273320	0.771789
hsa-miR-1246	ZKSCAN8	ENSG00000198315 (ZKSCAN8)	ENST00000330236	0.801224
hsa-miR-1246	ZNF10	ENSG00000256223 (ZNF10)	ENST00000248211	0.777137
hsa-miR-1246	ZNF101	ENSG00000181896 (ZNF101)	ENST00000592502	0.799238
hsa-miR-1246	ZNF112	ENSG00000062370 (ZNF112)	ENST00000354340	0.70186
hsa-miR-1246	ZNF124	ENSG00000196418 (ZNF124)	ENST00000472531	0.773798
hsa-miR-1246	ZNF143	ENSG00000166478 (ZNF143)	ENST00000396602	0.795657
hsa-miR-1246	ZNF148	ENSG00000163848 (ZNF148)	ENST00000360647	0.707139
hsa-miR-1246	ZNF155	ENSG00000204920 (ZNF155)	ENST00000270014	0.77719
hsa-miR-1246	ZNF17	ENSG00000186272 (ZNF17)	ENST00000307658	0.716218
hsa-miR-1246	ZNF226	ENSG00000167380 (ZNF226)	ENST00000588883	0.723859
hsa-miR-1246	ZNF227	ENSG00000131115 (ZNF227)	ENST00000313040	0.804019
hsa-miR-1246	ZNF23	ENSG00000167377 (ZNF23)	ENST00000497160	0.911396
hsa-miR-1246	ZNF254	ENSG00000213096 (ZNF254)	ENST00000357002	0.751241
hsa-miR-1246	ZNF267	ENSG00000185947 (ZNF267)	ENST00000300870	0.94052
hsa-miR-1246	ZNF304	ENSG00000131845 (ZNF304)	ENST00000391705	0.803794
hsa-miR-1246	ZNF420	ENSG00000197050 (ZNF420)	ENST00000337995	0.797018
hsa-miR-1246	ZNF430	ENSG00000118620 (ZNF430)	ENST00000595401	0.708396
hsa-miR-1246	ZNF462	ENSG00000148143 (ZNF462)	ENST00000277225	0.996226
hsa-miR-1246	ZNF470	ENSG00000197016 (ZNF470)	ENST00000330619	0.83729
hsa-miR-1246	ZNF502	ENSG00000196653 (ZNF502)	ENST00000296091	0.7184
hsa-miR-1246	ZNF507	ENSG00000168813 (ZNF507)	ENST00000311921	0.779413
hsa-miR-1246	ZNF518B	ENSG00000178163 (ZNF518B)	ENST00000326756	0.819755
hsa-miR-1246	ZNF525	ENSG00000203326 (ZNF525)	ENST00000467003	0.749193
hsa-miR-1246	ZNF528	ENSG00000167555 (ZNF528)	ENST00000391788	0.819639
hsa-miR-1246	ZNF583	ENSG00000198440 (ZNF583)	ENST00000333201	0.706567
hsa-miR-1246	ZNF625	ENSG00000257591 (ZNF625)	ENST00000455799	0.756425
hsa-miR-1246	ZNF627	ENSG00000198551 (ZNF627)	ENST00000588174	0.772469
hsa-miR-1246	ZNF675	ENSG00000197372 (ZNF675)	ENST00000601935	0.979618
hsa-miR-1246	ZNF677	ENSG00000197928 (ZNF677)	ENST00000333952	0.744826
hsa-miR-1246	ZNF680	ENSG00000173041 (ZNF680)	ENST00000447137	0.738367
hsa-miR-1246	ZNF697	ENSG00000143067 (ZNF697)	ENST00000421812	0.949074
hsa-miR-1246	ZNF704	ENSG00000164684 (ZNF704)	ENST00000327835	0.804675
hsa-miR-1246	ZNF720	ENSG00000197302 (ZNF720)	ENST00000534277	0.859626
hsa-miR-1246	ZNF770	ENSG00000198146 (ZNF770)	ENST00000356321	0.863873
hsa-miR-1246	ZNF773	ENSG00000152439 (ZNF773)	ENST00000599847	0.857051
hsa-miR-1246	ZNF800	ENSG00000048405 (ZNF800)	ENST00000393313	0.732956
hsa-miR-1246	ZNF816	ENSG00000180257 (ZNF816)	ENST00000549216	0.764638
hsa-miR-1246	ZNF83	ENSG00000167766 (ZNF83)	ENST00000594682	0.807008
hsa-miR-1246	ZNF845	ENSG00000213799 (ZNF845)	ENST00000458035	0.856963
hsa-miR-1246	ZNF85	ENSG00000105750 (ZNF85)	ENST00000300540	0.74267
hsa-miR-1246	ZNF860	ENSG00000197385 (ZNF860)	ENST00000360311	0.75284
hsa-miR-1246	ZNF91	ENSG00000167232 (ZNF91)	ENST00000300619	0.884575
hsa-miR-1246	ZSCAN30	ENSG00000186814 (ZSCAN30)	ENST00000589178	0.709456
hsa-miR-1246	ZSCAN31	ENSG00000235109 (ZSCAN31)	ENST00000439158	0.71171
hsa-miR-1246	ZXDB	ENSG00000198455 (ZXDB)	ENST00000374888	0.751141
hsa-miR-1246	ZYG11B	ENSG00000162378 (ZYG11B)	ENST00000294353	0.738775
hsa-miR-1307-3p	C3orf70	ENSG00000187068 (C3orf70)	ENST00000335012	0.793623
hsa-miR-1307-3p	CTC-429P9.4	ENSG00000268790 (CTC-429P9.4)	ENST00000600705	0.704316
hsa-miR-1307-3p	CYGB	ENSG00000161544 (CYGB)	ENST00000293230	0.706475
hsa-miR-1307-3p	EHMT1	ENSG00000181090 (EHMT1)	ENST00000462942	0.747697
hsa-miR-1307-3p	EML2	ENSG00000125746 (EML2)	ENST00000586195	0.704923
hsa-miR-1307-3p	EMP3	ENSG00000142227 (EMP3)	ENST00000599255	0.833731
hsa-miR-1307-3p	FAM229A	ENSG00000225828 (FAM229A)	ENST00000428500	0.754252
hsa-miR-1307-3p	FLII	ENSG00000177731 (FLII)	ENST00000578101	0.783663
hsa-miR-1307-3p	IQCB1	ENSG00000173226 (IQCB1)	ENST00000393650	0.787557
hsa-miR-1307-3p	MOV10L1	ENSG00000073146 (MOV10L1)	ENST00000419054	0.70617
hsa-miR-1307-3p	NADSYN1	ENSG00000172890 (NADSYN1)	ENST00000525200	0.891975
hsa-miR-1307-3p	NDRG2	ENSG00000165795 (NDRG2)	ENST00000557353	0.768443
hsa-miR-1307-3p	PATL2	ENSG00000229474 (PATL2)	ENST00000558481	0.769723
hsa-miR-1307-3p	PRR24	ENSG00000257704 (PRR24)	ENST00000552360	0.726043
hsa-miR-1307-3p	RPS11	ENSG00000142534 (RPS11)	ENST00000601306	0.710185
hsa-miR-1307-3p	SLC22A1	ENSG00000175003 (SLC22A1)	ENST00000539263	0.776883
hsa-miR-1307-3p	STARD9	ENSG00000159433 (STARD9)	ENST00000562619	0.790305
hsa-miR-1307-3p	TBC1D10C	ENSG00000175463 (TBC1D10C)	ENST00000529635	0.778226
hsa-miR-1307-3p	TFPT	ENSG00000105619 (TFPT)	ENST00000420715	0.708655
hsa-miR-1307-3p	TMEM161A	ENSG00000064545 (TMEM161A)	ENST00000450333	0.737668
hsa-miR-1307-3p	VKORC1L1	ENSG00000196715 (VKORC1L1)	ENST00000360768	0.813728
hsa-miR-1307-3p	WBSCR16	ENSG00000174374 (WBSCR16)	ENST00000503250	0.947611
hsa-miR-151b	AC013269.5	ENSG00000184761 (AC013269.5)	ENST00000409259	0.704913
hsa-miR-151b	APH1A	ENSG00000117362 (APH1A)	ENST00000360244	0.762185
hsa-miR-151b	B3GALT5	ENSG00000183778 (B3GALT5)	ENST00000380620	0.760398
hsa-miR-151b	C15orf37	ENSG00000259642 (C15orf37)	ENST00000560255	0.732301
hsa-miR-151b	C2	ENSG00000166278 (C2)	ENST00000482060	0.834911
hsa-miR-151b	CTD-2162K18.4	ENSG00000267260 (CTD-2162K18.4)	ENST00000590750	0.802582
hsa-miR-151b	DNMBP	ENSG00000107554 (DNMBP)	ENST00000543621	0.895435
hsa-miR-151b	EFNB2	ENSG00000125266 (EFNB2)	ENST00000245323	0.715794
hsa-miR-151b	FANCA	ENSG00000187741 (FANCA)	ENST00000389301	0.866656
hsa-miR-151b	FOXP2	ENSG00000128573 (FOXP2)	ENST00000441290	0.872242
hsa-miR-151b	GALP	ENSG00000197487 (GALP)	ENST00000440823	0.722014
hsa-miR-151b	GLT1D1	ENSG00000151948 (GLT1D1)	ENST00000441390	0.743369
hsa-miR-151b	GNLY	ENSG00000115523 (GNLY)	ENST00000263863	0.715512
hsa-miR-151b	GPR173	ENSG00000184194 (GPR173)	ENST00000332582	0.796512
hsa-miR-151b	HELT	ENSG00000187821 (HELT)	ENST00000505610	0.712206
hsa-miR-151b	HOXB4	ENSG00000182742 (HOXB4)	ENST00000332503	0.714983
hsa-miR-151b	JMJD8	ENSG00000161999 (JMJD8)	ENST00000412368	0.833319
hsa-miR-151b	KIAA1429	ENSG00000164944 (KIAA1429)	ENST00000437199	0.898695
hsa-miR-151b	MAP3K4	ENSG00000085511 (MAP3K4)	ENST00000490904	0.915379
hsa-miR-151b	MEST	ENSG00000106484 (MEST)	ENST00000223215	0.715951
hsa-miR-151b	MRPL43	ENSG00000055950 (MRPL43)	ENST00000318325	0.737131
hsa-miR-151b	MTRR	ENSG00000124275 (MTRR)	ENST00000511461	0.788951
hsa-miR-151b	NDE1	ENSG00000072864 (NDE1)	ENST00000342673	0.778728
hsa-miR-151b	NTRK2	ENSG00000148053 (NTRK2)	ENST00000376208	0.998092
hsa-miR-151b	PATZ1	ENSG00000100105 (PATZ1)	ENST00000405309	0.794797
hsa-miR-151b	PQLC1	ENSG00000122490 (PQLC1)	ENST00000351365	0.755237
hsa-miR-151b	PRODH	ENSG00000100033 (PRODH)	ENST00000420436	0.71475
hsa-miR-151b	RALGAPA1	ENSG00000174373 (RALGAPA1)	ENST00000389698	0.918591
hsa-miR-151b	RARG	ENSG00000172819 (RARG)	ENST00000425354	0.700227
hsa-miR-151b	RNF165	ENSG00000141622 (RNF165)	ENST00000586604	0.834734
hsa-miR-151b	SEZ6L	ENSG00000100095 (SEZ6L)	ENST00000360929	0.847075
hsa-miR-151b	SH2D4B	ENSG00000178217 (SH2D4B)	ENST00000313455	0.735934
hsa-miR-151b	SIGLEC12	ENSG00000254521 (SIGLEC12)	ENST00000596742	0.715151
hsa-miR-151b	SLC25A24	ENSG00000085491 (SLC25A24)	ENST00000264128	0.793185
hsa-miR-151b	SOX17	ENSG00000164736 (SOX17)	ENST00000297316	0.827184
hsa-miR-151b	SRSF7	ENSG00000115875 (SRSF7)	ENST00000425778	0.756771
hsa-miR-151b	TDRD3	ENSG00000083544 (TDRD3)	ENST00000484389	0.720932
hsa-miR-151b	TUBG1	ENSG00000131462 (TUBG1)	ENST00000589688	0.702447
hsa-miR-151b	UTY	ENSG00000183878 (UTY)	ENST00000331397	0.739292
hsa-miR-151b	XPR1	ENSG00000143324 (XPR1)	ENST00000367590	0.74949
hsa-miR-151b	ZNF208	ENSG00000160321 (ZNF208)	ENST00000601773	0.968026
hsa-miR-151b	ZNF532	ENSG00000074657 (ZNF532)	ENST00000336078	0.757345
hsa-miR-3197	AC010536.1	ENSG00000226180 (AC010536.1)	ENST00000538868	0.958233
hsa-miR-3197	ADCYAP1R1	ENSG00000078549 (ADCYAP1R1)	ENST00000304166	0.729563
hsa-miR-3197	AL133373.1	ENSG00000268657 (AL133373.1)	ENST00000596306	0.797741
hsa-miR-3197	ALG3	ENSG00000214160 (ALG3)	ENST00000411922	0.882499
hsa-miR-3197	APOBEC3C	ENSG00000244509 (APOBEC3C)	ENST00000361441	0.727353
hsa-miR-3197	ASCC2	ENSG00000100325 (ASCC2)	ENST00000458594	0.79681
hsa-miR-3197	ATP5SL	ENSG00000105341 (ATP5SL)	ENST00000438807	0.813838
hsa-miR-3197	BMP8B	ENSG00000116985 (BMP8B)	ENST00000372827	0.712384
hsa-miR-3197	C19orf35	ENSG00000188305 (C19orf35)	ENST00000342063	0.737739
hsa-miR-3197	C19orf55	ENSG00000167595 (C19orf55)	ENST00000535581	0.728211
hsa-miR-3197	C19orf84	ENSG00000262874 (C19orf84)	ENST00000574814	0.720733
hsa-miR-3197	CASK	ENSG00000147044 (CASK)	ENST00000318588	0.716869
hsa-miR-3197	CDH16	ENSG00000166589 (CDH16)	ENST00000567269	0.799804
hsa-miR-3197	CEACAM18	ENSG00000213822 (CEACAM18)	ENST00000396477	0.737887
hsa-miR-3197	CEP89	ENSG00000121289 (CEP89)	ENST00000591698	0.752819
hsa-miR-3197	CHST3	ENSG00000122863 (CHST3)	ENST00000373115	0.71789
hsa-miR-3197	CLASP1	ENSG00000074054 (CLASP1)	ENST00000409078	0.792295
hsa-miR-3197	CLCN3	ENSG00000109572 (CLCN3)	ENST00000513761	0.842961
hsa-miR-3197	CTD-2162K18.4	ENSG00000267260 (CTD-2162K18.4)	ENST00000590750	0.778433
hsa-miR-3197	CTNNBIP1	ENSG00000178585 (CTNNBIP1)	ENST00000377263	0.914214
hsa-miR-3197	CTSH	ENSG00000103811 (CTSH)	ENST00000533777	0.757913
hsa-miR-3197	DAND5	ENSG00000179284 (DAND5)	ENST00000585548	0.796177
hsa-miR-3197	DBP	ENSG00000105516 (DBP)	ENST00000222122	0.715654
hsa-miR-3197	DCAF7	ENSG00000136485 (DCAF7)	ENST00000310827	0.711967
hsa-miR-3197	ESPL1	ENSG00000135476 (ESPL1)	ENST00000552671	0.84401
hsa-miR-3197	EXOC3	ENSG00000180104 (EXOC3)	ENST00000515601	0.74416
hsa-miR-3197	FAM129B	ENSG00000136830 (FAM129B)	ENST00000373314	0.852592
hsa-miR-3197	FAM168B	ENSG00000152102 (FAM168B)	ENST00000409185	0.799246
hsa-miR-3197	FBRS	ENSG00000156860 (FBRS)	ENST00000543786	0.730955
hsa-miR-3197	FCGR2A	ENSG00000143226 (FCGR2A)	ENST00000271450	0.837451
hsa-miR-3197	FTO	ENSG00000140718 (FTO)	ENST00000471389	0.72577
hsa-miR-3197	GLG1	ENSG00000090863 (GLG1)	ENST00000567951	0.741938
hsa-miR-3197	GOLGA6L6	ENSG00000215405 (GOLGA6L6)	ENST00000427390	0.719969
hsa-miR-3197	GPX2	ENSG00000176153 (GPX2)	ENST00000553522	0.985243
hsa-miR-3197	GRAMD1A	ENSG00000089351 (GRAMD1A)	ENST00000600231	0.73741
hsa-miR-3197	GRM4	ENSG00000124493 (GRM4)	ENST00000609278	0.710486
hsa-miR-3197	GSX1	ENSG00000169840 (GSX1)	ENST00000302945	0.718032
hsa-miR-3197	HAUS5	ENSG00000249115 (HAUS5)	ENST00000424522	0.728822
hsa-miR-3197	HEBP1	ENSG00000013583 (HEBP1)	ENST00000536942	0.846701
hsa-miR-3197	HECTD4	ENSG00000173064 (HECTD4)	ENST00000377560	0.806846
hsa-miR-3197	HOXB6	ENSG00000108511 (HOXB6)	ENST00000484302	0.725396
hsa-miR-3197	HOXC6	ENSG00000197757 (HOXC6)	ENST00000243108	0.710884
hsa-miR-3197	IGFBP5	ENSG00000115461 (IGFBP5)	ENST00000233813	0.70804
hsa-miR-3197	INO80	ENSG00000128908 (INO80)	ENST00000558357	0.70117
hsa-miR-3197	ISOC1	ENSG00000066583 (ISOC1)	ENST00000173527	0.970479
hsa-miR-3197	KDM6B	ENSG00000132510 (KDM6B)	ENST00000254846	0.736827
hsa-miR-3197	KLF12	ENSG00000118922 (KLF12)	ENST00000377669	0.790966
hsa-miR-3197	KRBA1	ENSG00000133619 (KRBA1)	ENST00000496259	0.85694
hsa-miR-3197	LA16c-431H6.6	ENSG00000261732 (LA16c-431H6.6)	ENST00000454337	0.818107
hsa-miR-3197	MCF2L2	ENSG00000053524 (MCF2L2)	ENST00000473233	0.749699
hsa-miR-3197	METTL22	ENSG00000067365 (METTL22)	ENST00000163678	0.766005
hsa-miR-3197	MORN4	ENSG00000171160 (MORN4)	ENST00000478953	0.856048
hsa-miR-3197	MRPS12	ENSG00000128626 (MRPS12)	ENST00000407800	0.758342
hsa-miR-3197	MTRR	ENSG00000124275 (MTRR)	ENST00000511461	0.741899
hsa-miR-3197	NAA60	ENSG00000262621 (NAA60)	ENST00000575785	0.767016
hsa-miR-3197	NCOA1	ENSG00000084676 (NCOA1)	ENST00000288599	0.766021
hsa-miR-3197	NCOR2	ENSG00000196498 (NCOR2)	ENST00000405201	0.757338
hsa-miR-3197	NCR3LG1	ENSG00000188211 (NCR3LG1)	ENST00000338965	0.730725
hsa-miR-3197	NDEL1	ENSG00000166579 (NDEL1)	ENST00000380025	0.744687
hsa-miR-3197	NDUFV3	ENSG00000160194 (NDUFV3)	ENST00000340344	0.715191
hsa-miR-3197	NECAB3	ENSG00000125967 (NECAB3)	ENST00000488489	0.736465
hsa-miR-3197	NKX3-2	ENSG00000109705 (NKX3-2)	ENST00000382438	0.706917
hsa-miR-3197	NOL12	ENSG00000100101 (NOL12)	ENST00000455236	0.77553
hsa-miR-3197	NTS	ENSG00000133636 (NTS)	ENST00000256010	0.707319
hsa-miR-3197	NUP98	ENSG00000110713 (NUP98)	ENST00000359171	0.703368
hsa-miR-3197	NUPR1	ENSG00000176046 (NUPR1)	ENST00000567646	0.867769
hsa-miR-3197	NUTM2E	ENSG00000228570 (NUTM2E)	ENST00000602967	0.966652
hsa-miR-3197	PAEP	ENSG00000122133 (PAEP)	ENST00000457014	0.773272
hsa-miR-3197	PDRG1	ENSG00000088356 (PDRG1)	ENST00000202017	0.831255
hsa-miR-3197	PELI2	ENSG00000139946 (PELI2)	ENST00000267460	0.731939
hsa-miR-3197	PEX26	ENSG00000215193 (PEX26)	ENST00000329627	0.754817
hsa-miR-3197	PIP5K1C	ENSG00000186111 (PIP5K1C)	ENST00000335312	0.778787
hsa-miR-3197	PKD1	ENSG00000008710 (PKD1)	ENST00000487932	0.803701
hsa-miR-3197	PPP1R3D	ENSG00000132825 (PPP1R3D)	ENST00000370996	0.787188
hsa-miR-3197	PRRG3	ENSG00000130032 (PRRG3)	ENST00000370353	0.843664
hsa-miR-3197	PRRT1	ENSG00000204314 (PRRT1)	ENST00000375150	0.769234
hsa-miR-3197	RABEP2	ENSG00000177548 (RABEP2)	ENST00000358201	0.730314
hsa-miR-3197	RARS	ENSG00000113643 (RARS)	ENST00000520013	0.735664
hsa-miR-3197	RP11-51F16.8	ENSG00000125695 (RP11-51F16.8)	ENST00000580553	0.736549
hsa-miR-3197	RP11-552F3.12	ENSG00000267426 (RP11-552F3.12)	ENST00000590947	0.802829
hsa-miR-3197	SCARF1	ENSG00000074660 (SCARF1)	ENST00000573852	0.748315
hsa-miR-3197	SCUBE1	ENSG00000159307 (SCUBE1)	ENST00000360835	0.704881
hsa-miR-3197	SCYL3	ENSG00000000457 (SCYL3)	ENST00000367771	0.848501
hsa-miR-3197	SEC22C	ENSG00000093183 (SEC22C)	ENST00000451653	0.747039
hsa-miR-3197	SERF1A	ENSG00000172058 (SERF1A)	ENST00000354833	0.735466
hsa-miR-3197	SIRPB1	ENSG00000101307 (SIRPB1)	ENST00000381605	0.725191
hsa-miR-3197	SLC29A1	ENSG00000112759 (SLC29A1)	ENST00000393844	0.711851
hsa-miR-3197	SMARCD3	ENSG00000082014 (SMARCD3)	ENST00000469154	0.765414
hsa-miR-3197	SP140L	ENSG00000185404 (SP140L)	ENST00000396563	0.838584
hsa-miR-3197	SPIRE2	ENSG00000204991 (SPIRE2)	ENST00000563972	0.72636
hsa-miR-3197	SRCIN1	ENSG00000017373 (SRCIN1)	ENST00000264659	0.776506
hsa-miR-3197	STON2	ENSG00000140022 (STON2)	ENST00000555447	0.766878
hsa-miR-3197	SZT2	ENSG00000198198 (SZT2)	ENST00000372442	0.73889
hsa-miR-3197	TAPBP	ENSG00000231925 (TAPBP)	ENST00000434618	0.709443
hsa-miR-3197	TOM1L2	ENSG00000175662 (TOM1L2)	ENST00000581396	0.82908
hsa-miR-3197	TOR2A	ENSG00000160404 (TOR2A)	ENST00000458505	0.730368
hsa-miR-3197	TRIOBP	ENSG00000100106 (TRIOBP)	ENST00000344404	0.798839
hsa-miR-3197	TRPM4	ENSG00000130529 (TRPM4)	ENST00000595519	0.706583
hsa-miR-3197	TWF2	ENSG00000247596 (TWF2)	ENST00000499914	0.792069
hsa-miR-3197	USP40	ENSG00000085982 (USP40)	ENST00000450966	0.703247
hsa-miR-3197	VPS33B	ENSG00000184056 (VPS33B)	ENST00000574755	0.894081
hsa-miR-3197	ZNF208	ENSG00000160321 (ZNF208)	ENST00000601773	0.87604
hsa-miR-3197	ZNF44	ENSG00000197857 (ZNF44)	ENST00000600003	0.835954
hsa-miR-3197	ZNF595	ENSG00000197701 (ZNF595)	ENST00000509152	0.805579
hsa-miR-3197	ZNF788	ENSG00000214189 (ZNF788)	ENST00000430298	0.792866
hsa-miR-3197	ZNF850	ENSG00000267041 (ZNF850)	ENST00000591344	0.713044
hsa-miR-3197	ZNF880	ENSG00000221923 (ZNF880)	ENST00000600321	0.889099
hsa-miR-3197	ZNRF1	ENSG00000186187 (ZNRF1)	ENST00000335325	0.71153
hsa-miR-4267	MARCH9	ENSG00000139266 (MARCH9)	ENST00000266643	0.851672
hsa-miR-4267	SEPT6	ENSG00000125354 (SEPT6)	ENST00000394610	0.787163
hsa-miR-4267	AAK1	ENSG00000115977 (AAK1)	ENST00000409085	0.814761
hsa-miR-4267	AASS	ENSG00000008311 (AASS)	ENST00000431170	0.850407
hsa-miR-4267	AATF	ENSG00000108270 (AATF)	ENST00000592751	0.73518
hsa-miR-4267	ABCA10	ENSG00000154263 (ABCA10)	ENST00000522406	0.878788
hsa-miR-4267	ABCA2	ENSG00000107331 (ABCA2)	ENST00000487109	0.735361
hsa-miR-4267	ABCA5	ENSG00000154265 (ABCA5)	ENST00000392676	0.837715
hsa-miR-4267	ABCA9	ENSG00000154258 (ABCA9)	ENST00000370732	0.793081
hsa-miR-4267	ABCB11	ENSG00000073734 (ABCB11)	ENST00000439188	0.787785
hsa-miR-4267	ABCB8	ENSG00000197150 (ABCB8)	ENST00000358849	0.725475
hsa-miR-4267	ABCC11	ENSG00000121270 (ABCC11)	ENST00000537808	0.775878
hsa-miR-4267	ABCC12	ENSG00000140798 (ABCC12)	ENST00000529084	0.797099
hsa-miR-4267	ABCC8	ENSG00000006071 (ABCC8)	ENST00000527905	0.909262
hsa-miR-4267	ABCD4	ENSG00000119688 (ABCD4)	ENST00000481935	0.999089
hsa-miR-4267	ABCF1	ENSG00000204574 (ABCF1)	ENST00000475993	0.840892
hsa-miR-4267	ABCF2	ENSG00000033050 (ABCF2)	ENST00000287844	0.935826
hsa-miR-4267	ABHD15	ENSG00000168792 (ABHD15)	ENST00000307201	0.700533
hsa-miR-4267	ABHD16A	ENSG00000204427 (ABHD16A)	ENST00000492084	0.956579
hsa-miR-4267	ABI2	ENSG00000138443 (ABI2)	ENST00000295851	0.849069
hsa-miR-4267	ABI3	ENSG00000108798 (ABI3)	ENST00000225941	0.910159
hsa-miR-4267	ABL2	ENSG00000143322 (ABL2)	ENST00000502732	0.722541
hsa-miR-4267	ABTB2	ENSG00000166016 (ABTB2)	ENST00000298992	0.715666
hsa-miR-4267	AC002472.13	ENSG00000187905 (AC002472.13)	ENST00000543388	0.980815
hsa-miR-4267	AC002985.3	ENSG00000268193 (AC002985.3)	ENST00000596918	0.931856
hsa-miR-4267	AC004381.6	ENSG00000005189 (AC004381.6)	ENST00000566993	0.946065
hsa-miR-4267	AC006372.1	ENSG00000236669 (AC006372.1)	ENST00000444154	0.848054
hsa-miR-4267	AC006946.15	ENSG00000235478 (AC006946.15)	ENST00000441544	0.780543
hsa-miR-4267	AC010336.1	ENSG00000214248 (AC010336.1)	ENST00000539278	0.752265
hsa-miR-4267	AC011755.1	ENSG00000269686 (AC011755.1)	ENST00000596384	0.800117
hsa-miR-4267	AC012123.1	ENSG00000228835 (AC012123.1)	ENST00000426194	0.755228
hsa-miR-4267	AC024592.12	ENSG00000267740 (AC024592.12)	ENST00000592091	0.896382
hsa-miR-4267	AC092850.1	ENSG00000267819 (AC092850.1)	ENST00000598023	0.971389
hsa-miR-4267	AC110619.2	ENSG00000218416 (AC110619.2)	ENST00000404891	0.768837
hsa-miR-4267	AC135983.2	ENSG00000268759 (AC135983.2)	ENST00000593303	0.80591
hsa-miR-4267	AC174470.1	ENSG00000215621 (AC174470.1)	ENST00000457257	0.720956
hsa-miR-4267	ACADM	ENSG00000117054 (ACADM)	ENST00000525808	0.767142
hsa-miR-4267	ACADVL	ENSG00000072778 (ACADVL)	ENST00000322910	0.783639
hsa-miR-4267	ACAP2	ENSG00000114331 (ACAP2)	ENST00000326793	0.729642
hsa-miR-4267	ACE	ENSG00000264813 (ACE)	ENST00000577647	0.884209
hsa-miR-4267	ACE	ENSG00000159640 (ACE)	ENST00000490216	0.88392
hsa-miR-4267	ACSL5	ENSG00000197142 (ACSL5)	ENST00000354273	0.890913
hsa-miR-4267	ACTN2	ENSG00000077522 (ACTN2)	ENST00000366578	0.86353
hsa-miR-4267	ACTR3C	ENSG00000106526 (ACTR3C)	ENST00000478393	0.783318
hsa-miR-4267	ADAM11	ENSG00000073670 (ADAM11)	ENST00000355638	0.887067
hsa-miR-4267	ADAM23	ENSG00000114948 (ADAM23)	ENST00000264377	0.784366
hsa-miR-4267	ADAMTS15	ENSG00000166106 (ADAMTS15)	ENST00000299164	0.863071
hsa-miR-4267	ADAMTS4	ENSG00000158859 (ADAMTS4)	ENST00000367996	0.777785
hsa-miR-4267	ADAMTSL1	ENSG00000178031 (ADAMTSL1)	ENST00000380548	0.734086
hsa-miR-4267	ADCK5	ENSG00000173137 (ADCK5)	ENST00000529654	0.950975
hsa-miR-4267	ADCY6	ENSG00000174233 (ADCY6)	ENST00000357869	0.875321
hsa-miR-4267	ADCYAP1R1	ENSG00000078549 (ADCYAP1R1)	ENST00000304166	0.878807
hsa-miR-4267	ADGB	ENSG00000118492 (ADGB)	ENST00000493950	0.72595
hsa-miR-4267	ADNP	ENSG00000101126 (ADNP)	ENST00000396029	0.961009
hsa-miR-4267	ADORA1	ENSG00000163485 (ADORA1)	ENST00000367235	0.718177
hsa-miR-4267	ADPGK	ENSG00000159322 (ADPGK)	ENST00000567941	0.729526
hsa-miR-4267	ADPRH	ENSG00000144843 (ADPRH)	ENST00000478399	0.734781
hsa-miR-4267	AFF1	ENSG00000172493 (AFF1)	ENST00000395146	0.895303
hsa-miR-4267	AFF2	ENSG00000155966 (AFF2)	ENST00000370457	0.735777
hsa-miR-4267	AGBL5	ENSG00000084693 (AGBL5)	ENST00000487078	0.812137
hsa-miR-4267	AGFG2	ENSG00000106351 (AGFG2)	ENST00000300176	0.796286
hsa-miR-4267	AGO1	ENSG00000092847 (AGO1)	ENST00000373204	0.909604
hsa-miR-4267	AGT	ENSG00000135744 (AGT)	ENST00000366667	0.905238
hsa-miR-4267	AIFM1	ENSG00000156709 (AIFM1)	ENST00000527892	0.78051
hsa-miR-4267	AIPL1	ENSG00000129221 (AIPL1)	ENST00000381128	0.871657
hsa-miR-4267	AKR1C1	ENSG00000187134 (AKR1C1)	ENST00000380872	0.838566
hsa-miR-4267	AL356356.1	ENSG00000225996 (AL356356.1)	ENST00000538795	0.702135
hsa-miR-4267	AL359091.2	ENSG00000268211 (AL359091.2)	ENST00000601297	0.715141
hsa-miR-4267	ALDH16A1	ENSG00000161618 (ALDH16A1)	ENST00000593417	0.718391
hsa-miR-4267	ALDH1A2	ENSG00000128918 (ALDH1A2)	ENST00000430119	0.898039
hsa-miR-4267	ALDH1L1	ENSG00000144908 (ALDH1L1)	ENST00000473607	0.700114
hsa-miR-4267	ALG1	ENSG00000033011 (ALG1)	ENST00000591822	0.860852
hsa-miR-4267	ALG5	ENSG00000120697 (ALG5)	ENST00000413537	0.807239
hsa-miR-4267	ALOX15	ENSG00000161905 (ALOX15)	ENST00000570836	0.741835
hsa-miR-4267	ALPK3	ENSG00000136383 (ALPK3)	ENST00000258888	0.755753
hsa-miR-4267	AMDHD2	ENSG00000162066 (AMDHD2)	ENST00000302956	0.845696
hsa-miR-4267	AMOT	ENSG00000126016 (AMOT)	ENST00000304758	0.787958
hsa-miR-4267	AMZ1	ENSG00000174945 (AMZ1)	ENST00000312371	0.827688
hsa-miR-4267	ANK1	ENSG00000029534 (ANK1)	ENST00000289734	0.73363
hsa-miR-4267	ANKFY1	ENSG00000185722 (ANKFY1)	ENST00000341657	0.85328
hsa-miR-4267	ANKRD11	ENSG00000167522 (ANKRD11)	ENST00000330736	0.812013
hsa-miR-4267	ANKRD23	ENSG00000163126 (ANKRD23)	ENST00000318357	0.769576
hsa-miR-4267	ANKRD39	ENSG00000213337 (ANKRD39)	ENST00000443120	0.719019
hsa-miR-4267	ANKRD42	ENSG00000137494 (ANKRD42)	ENST00000393389	0.721262
hsa-miR-4267	ANO8	ENSG00000074855 (ANO8)	ENST00000597643	0.875213
hsa-miR-4267	ANXA11	ENSG00000122359 (ANXA11)	ENST00000438331	0.730476
hsa-miR-4267	AOC3	ENSG00000131471 (AOC3)	ENST00000591562	0.809734
hsa-miR-4267	AP000974.1	ENSG00000215504 (AP000974.1)	ENST00000544076	0.99966
hsa-miR-4267	AP1S3	ENSG00000152056 (AP1S3)	ENST00000415298	0.999567
hsa-miR-4267	AP2A1	ENSG00000196961 (AP2A1)	ENST00000597774	0.720048
hsa-miR-4267	APOBEC2	ENSG00000124701 (APOBEC2)	ENST00000244669	0.775203
hsa-miR-4267	APOC3	ENSG00000110245 (APOC3)	ENST00000227667	0.792257
hsa-miR-4267	APOLD1	ENSG00000178878 (APOLD1)	ENST00000356591	0.708867
hsa-miR-4267	AQR	ENSG00000021776 (AQR)	ENST00000543879	0.939547
hsa-miR-4267	ARFGAP1	ENSG00000101199 (ARFGAP1)	ENST00000370275	0.930025
hsa-miR-4267	ARHGAP19-SLIT1	ENSG00000269891 (ARHGAP19-SLIT1)	ENST00000453547	0.998397
hsa-miR-4267	ARHGAP26	ENSG00000145819 (ARHGAP26)	ENST00000378004	0.716516
hsa-miR-4267	ARHGAP6	ENSG00000047648 (ARHGAP6)	ENST00000495242	0.754174
hsa-miR-4267	ARHGEF3	ENSG00000163947 (ARHGEF3)	ENST00000465659	0.713637
hsa-miR-4267	ARHGEF40	ENSG00000165801 (ARHGEF40)	ENST00000556399	0.827107
hsa-miR-4267	ARID4B	ENSG00000054267 (ARID4B)	ENST00000349213	0.72455
hsa-miR-4267	ARL10	ENSG00000175414 (ARL10)	ENST00000310389	0.777677
hsa-miR-4267	ARL3	ENSG00000138175 (ARL3)	ENST00000260746	0.862719
hsa-miR-4267	ARL6IP1	ENSG00000170540 (ARL6IP1)	ENST00000304414	0.757082
hsa-miR-4267	ARMC5	ENSG00000140691 (ARMC5)	ENST00000457010	0.813963
hsa-miR-4267	ARSB	ENSG00000113273 (ARSB)	ENST00000264914	0.723276
hsa-miR-4267	ASAP3	ENSG00000088280 (ASAP3)	ENST00000492982	0.845734
hsa-miR-4267	ASB12	ENSG00000198881 (ASB12)	ENST00000396130	0.731895
hsa-miR-4267	ASCC3	ENSG00000112249 (ASCC3)	ENST00000324696	0.857636
hsa-miR-4267	ASH1L	ENSG00000116539 (ASH1L)	ENST00000368346	0.759415
hsa-miR-4267	ASIC1	ENSG00000110881 (ASIC1)	ENST00000550558	0.865671
hsa-miR-4267	ASPSCR1	ENSG00000169696 (ASPSCR1)	ENST00000344865	0.729833
hsa-miR-4267	ATCAY	ENSG00000167654 (ATCAY)	ENST00000450849	0.898662
hsa-miR-4267	ATG13	ENSG00000175224 (ATG13)	ENST00000359513	0.712396
hsa-miR-4267	ATG16L1	ENSG00000085978 (ATG16L1)	ENST00000392021	0.798602
hsa-miR-4267	ATP13A4	ENSG00000127249 (ATP13A4)	ENST00000450950	0.967485
hsa-miR-4267	ATP1B2	ENSG00000129244 (ATP1B2)	ENST00000250111	0.771228
hsa-miR-4267	ATP2A3	ENSG00000074370 (ATP2A3)	ENST00000309890	0.719546
hsa-miR-4267	ATP5A1	ENSG00000152234 (ATP5A1)	ENST00000586592	0.786467
hsa-miR-4267	ATP6V1D	ENSG00000100554 (ATP6V1D)	ENST00000554087	0.764913
hsa-miR-4267	ATP8A1	ENSG00000124406 (ATP8A1)	ENST00000514372	0.938454
hsa-miR-4267	ATP8B2	ENSG00000143515 (ATP8B2)	ENST00000368489	0.7418
hsa-miR-4267	ATP8B4	ENSG00000104043 (ATP8B4)	ENST00000559726	0.74964
hsa-miR-4267	ATRIP	ENSG00000164053 (ATRIP)	ENST00000424906	0.714985
hsa-miR-4267	ATXN2	ENSG00000204842 (ATXN2)	ENST00000550844	0.755687
hsa-miR-4267	ATXN2L	ENSG00000168488 (ATXN2L)	ENST00000565971	0.877341
hsa-miR-4267	ATXN7	ENSG00000163635 (ATXN7)	ENST00000295900	0.850027
hsa-miR-4267	ATXN7L1	ENSG00000146776 (ATXN7L1)	ENST00000419735	0.819505
hsa-miR-4267	ATXN7L2	ENSG00000162650 (ATXN7L2)	ENST00000463678	0.705266
hsa-miR-4267	AVIL	ENSG00000135407 (AVIL)	ENST00000549851	0.998714
hsa-miR-4267	B4GALT3	ENSG00000158850 (B4GALT3)	ENST00000319769	0.789834
hsa-miR-4267	BAI1	ENSG00000181790 (BAI1)	ENST00000521208	0.79495
hsa-miR-4267	BAIAP2	ENSG00000175866 (BAIAP2)	ENST00000572329	0.854666
hsa-miR-4267	BAMBI	ENSG00000095739 (BAMBI)	ENST00000375533	0.913231
hsa-miR-4267	BCAR1	ENSG00000050820 (BCAR1)	ENST00000562556	0.911409
hsa-miR-4267	BCKDHB	ENSG00000083123 (BCKDHB)	ENST00000545529	0.732446
hsa-miR-4267	BET1L	ENSG00000177951 (BET1L)	ENST00000325147	0.874031
hsa-miR-4267	BHLHE40	ENSG00000134107 (BHLHE40)	ENST00000256495	0.759894
hsa-miR-4267	BICD2	ENSG00000185963 (BICD2)	ENST00000356884	0.702703
hsa-miR-4267	BLOC1S1	ENSG00000135441 (BLOC1S1)	ENST00000549147	0.742986
hsa-miR-4267	BMP1	ENSG00000168487 (BMP1)	ENST00000520626	0.705312
hsa-miR-4267	BMPR2	ENSG00000204217 (BMPR2)	ENST00000374574	0.832342
hsa-miR-4267	BPIFB6	ENSG00000167104 (BPIFB6)	ENST00000542375	0.99094
hsa-miR-4267	BRCA1	ENSG00000012048 (BRCA1)	ENST00000461221	0.96278
hsa-miR-4267	BRD2	ENSG00000204256 (BRD2)	ENST00000482914	0.863537
hsa-miR-4267	BRD8	ENSG00000112983 (BRD8)	ENST00000512140	0.999538
hsa-miR-4267	BRPF1	ENSG00000156983 (BRPF1)	ENST00000383829	0.758585
hsa-miR-4267	BRPF3	ENSG00000096070 (BRPF3)	ENST00000441123	0.778063
hsa-miR-4267	BSDC1	ENSG00000160058 (BSDC1)	ENST00000341071	0.738202
hsa-miR-4267	BTBD10	ENSG00000148925 (BTBD10)	ENST00000527102	0.965764
hsa-miR-4267	BTG1	ENSG00000133639 (BTG1)	ENST00000256015	0.847431
hsa-miR-4267	C10orf126	ENSG00000204365 (C10orf126)	ENST00000375520	0.851692
hsa-miR-4267	C10orf2	ENSG00000107815 (C10orf2)	ENST00000370228	0.754
hsa-miR-4267	C10ORF68	ENSG00000150076 (C10ORF68)	ENST00000302316	0.735935
hsa-miR-4267	C10orf76	ENSG00000120029 (C10orf76)	ENST00000370033	0.91072
hsa-miR-4267	C11orf49	ENSG00000149179 (C11orf49)	ENST00000525895	0.972249
hsa-miR-4267	C11orf72	ENSG00000184224 (C11orf72)	ENST00000333139	0.850147
hsa-miR-4267	C14orf166B	ENSG00000100565 (C14orf166B)	ENST00000484640	0.994716
hsa-miR-4267	C14orf39	ENSG00000179008 (C14orf39)	ENST00000557138	0.856834
hsa-miR-4267	C15orf27	ENSG00000169758 (C15orf27)	ENST00000484722	0.82533
hsa-miR-4267	C15orf52	ENSG00000188549 (C15orf52)	ENST00000397536	0.736289
hsa-miR-4267	C17orf67	ENSG00000214226 (C17orf67)	ENST00000397861	0.801445
hsa-miR-4267	C19orf47	ENSG00000160392 (C19orf47)	ENST00000582783	0.798279
hsa-miR-4267	C1orf106	ENSG00000163362 (C1orf106)	ENST00000367342	0.94477
hsa-miR-4267	C1orf158	ENSG00000157330 (C1orf158)	ENST00000288048	0.936118
hsa-miR-4267	C1orf27	ENSG00000157181 (C1orf27)	ENST00000287859	0.735995
hsa-miR-4267	C1orf61	ENSG00000125462 (C1orf61)	ENST00000368242	0.728597
hsa-miR-4267	C1orf95	ENSG00000203685 (C1orf95)	ENST00000366788	0.786259
hsa-miR-4267	C1QTNF1	ENSG00000173918 (C1QTNF1)	ENST00000392445	0.720338
hsa-miR-4267	C1QTNF7	ENSG00000163145 (C1QTNF7)	ENST00000429690	0.723529
hsa-miR-4267	C20orf194	ENSG00000088854 (C20orf194)	ENST00000252032	0.777919
hsa-miR-4267	C20orf96	ENSG00000196476 (C20orf96)	ENST00000360321	0.804465
hsa-miR-4267	C22orf42	ENSG00000205856 (C22orf42)	ENST00000382097	0.976853
hsa-miR-4267	C2orf68	ENSG00000168887 (C2orf68)	ENST00000306336	0.776129
hsa-miR-4267	C3orf49	ENSG00000163632 (C3orf49)	ENST00000295896	0.999949
hsa-miR-4267	C5AR2	ENSG00000134830 (C5AR2)	ENST00000595464	0.757795
hsa-miR-4267	C5orf15	ENSG00000113583 (C5orf15)	ENST00000231512	0.781428
hsa-miR-4267	C5orf20	ENSG00000251380 (C5orf20)	ENST00000503143	0.74012
hsa-miR-4267	C5orf24	ENSG00000181904 (C5orf24)	ENST00000394976	0.803672
hsa-miR-4267	C5orf42	ENSG00000197603 (C5orf42)	ENST00000509849	0.801073
hsa-miR-4267	C5orf49	ENSG00000215217 (C5orf49)	ENST00000399810	0.737933
hsa-miR-4267	C7orf31	ENSG00000153790 (C7orf31)	ENST00000409280	0.73768
hsa-miR-4267	C7orf55-LUC7L2	ENSG00000146963 (C7orf55-LUC7L2)	ENST00000456182	0.706317
hsa-miR-4267	C9orf114	ENSG00000198917 (C9orf114)	ENST00000361256	0.702182
hsa-miR-4267	C9orf47	ENSG00000186354 (C9orf47)	ENST00000334490	0.711159
hsa-miR-4267	CACNA1G	ENSG00000006283 (CACNA1G)	ENST00000504076	0.98942
hsa-miR-4267	CACNA1S	ENSG00000081248 (CACNA1S)	ENST00000367338	0.759915
hsa-miR-4267	CALHM1	ENSG00000185933 (CALHM1)	ENST00000329905	0.705045
hsa-miR-4267	CAMK2A	ENSG00000070808 (CAMK2A)	ENST00000348628	0.818232
hsa-miR-4267	CAMSAP1	ENSG00000130559 (CAMSAP1)	ENST00000389532	0.843916
hsa-miR-4267	CAMTA2	ENSG00000108509 (CAMTA2)	ENST00000574951	0.744388
hsa-miR-4267	CAPN6	ENSG00000077274 (CAPN6)	ENST00000324068	0.96321
hsa-miR-4267	CARD14	ENSG00000141527 (CARD14)	ENST00000575500	0.746628
hsa-miR-4267	CARHSP1	ENSG00000153048 (CARHSP1)	ENST00000396593	0.794367
hsa-miR-4267	CARS	ENSG00000110619 (CARS)	ENST00000531387	0.788678
hsa-miR-4267	CASP14	ENSG00000105141 (CASP14)	ENST00000427043	0.764529
hsa-miR-4267	CATSPERG	ENSG00000099338 (CATSPERG)	ENST00000471517	0.763681
hsa-miR-4267	CBLN3	ENSG00000139899 (CBLN3)	ENST00000267406	0.708222
hsa-miR-4267	CBR1	ENSG00000159228 (CBR1)	ENST00000530908	0.745115
hsa-miR-4267	CBWD2	ENSG00000136682 (CBWD2)	ENST00000358604	0.877205
hsa-miR-4267	CBX5	ENSG00000094916 (CBX5)	ENST00000209875	0.857563
hsa-miR-4267	CC2D1A	ENSG00000132024 (CC2D1A)	ENST00000586955	0.799408
hsa-miR-4267	CC2D2B	ENSG00000188649 (CC2D2B)	ENST00000371198	0.74568
hsa-miR-4267	CCBL2	ENSG00000137944 (CCBL2)	ENST00000370485	0.701812
hsa-miR-4267	CCDC107	ENSG00000159884 (CCDC107)	ENST00000421582	0.9512
hsa-miR-4267	CCDC115	ENSG00000136710 (CCDC115)	ENST00000442217	0.701184
hsa-miR-4267	CCDC149	ENSG00000181982 (CCDC149)	ENST00000504487	0.806243
hsa-miR-4267	CCDC151	ENSG00000198003 (CCDC151)	ENST00000591345	0.963652
hsa-miR-4267	CCDC152	ENSG00000198865 (CCDC152)	ENST00000361970	0.77911
hsa-miR-4267	CCDC178	ENSG00000166960 (CCDC178)	ENST00000581852	0.999917
hsa-miR-4267	CCDC180	ENSG00000197816 (CCDC180)	ENST00000395220	0.952249
hsa-miR-4267	CCDC183	ENSG00000213213 (CCDC183)	ENST00000479371	0.894266
hsa-miR-4267	CCDC27	ENSG00000162592 (CCDC27)	ENST00000462521	0.874959
hsa-miR-4267	CCDC6	ENSG00000108091 (CCDC6)	ENST00000263102	0.775551
hsa-miR-4267	CCDC61	ENSG00000104983 (CCDC61)	ENST00000596687	0.974729
hsa-miR-4267	CCDC64	ENSG00000135127 (CCDC64)	ENST00000546420	0.999491
hsa-miR-4267	CCDC65	ENSG00000139537 (CCDC65)	ENST00000547861	0.968784
hsa-miR-4267	CCDC69	ENSG00000198624 (CCDC69)	ENST00000355417	0.760244
hsa-miR-4267	CCDC88B	ENSG00000168071 (CCDC88B)	ENST00000356786	0.873646
hsa-miR-4267	CCDC97	ENSG00000142039 (CCDC97)	ENST00000269967	0.703305
hsa-miR-4267	CCNDBP1	ENSG00000166946 (CCNDBP1)	ENST00000563065	0.83701
hsa-miR-4267	CCNY	ENSG00000108100 (CCNY)	ENST00000374706	0.784589
hsa-miR-4267	CD22	ENSG00000012124 (CD22)	ENST00000601769	0.784608
hsa-miR-4267	CD2BP2	ENSG00000169217 (CD2BP2)	ENST00000305596	0.761089
hsa-miR-4267	CD37	ENSG00000104894 (CD37)	ENST00000391859	0.77836
hsa-miR-4267	CD44	ENSG00000026508 (CD44)	ENST00000263398	0.705892
hsa-miR-4267	CDAN1	ENSG00000140326 (CDAN1)	ENST00000562465	0.832625
hsa-miR-4267	CDC37	ENSG00000105401 (CDC37)	ENST00000588869	0.992815
hsa-miR-4267	CDCA5	ENSG00000146670 (CDCA5)	ENST00000275517	0.727491
hsa-miR-4267	CDH16	ENSG00000166589 (CDH16)	ENST00000567269	0.972849
hsa-miR-4267	CDH23	ENSG00000107736 (CDH23)	ENST00000442677	0.748296
hsa-miR-4267	CDHR1	ENSG00000148600 (CDHR1)	ENST00000372117	0.771216
hsa-miR-4267	CDK5RAP2	ENSG00000136861 (CDK5RAP2)	ENST00000473282	0.86063
hsa-miR-4267	CDK5RAP3	ENSG00000108465 (CDK5RAP3)	ENST00000580670	0.802909
hsa-miR-4267	CDKL4	ENSG00000205111 (CDKL4)	ENST00000378803	0.716
hsa-miR-4267	CDX1	ENSG00000113722 (CDX1)	ENST00000231656	0.719209
hsa-miR-4267	CEACAM18	ENSG00000213822 (CEACAM18)	ENST00000396477	0.757687
hsa-miR-4267	CECR2	ENSG00000099954 (CECR2)	ENST00000400573	0.818585
hsa-miR-4267	CELF5	ENSG00000161082 (CELF5)	ENST00000541430	0.849074
hsa-miR-4267	CENPF	ENSG00000117724 (CENPF)	ENST00000366955	0.741711
hsa-miR-4267	CEP152	ENSG00000103995 (CEP152)	ENST00000325747	0.733263
hsa-miR-4267	CEP44	ENSG00000164118 (CEP44)	ENST00000296519	0.792173
hsa-miR-4267	CEP72	ENSG00000112877 (CEP72)	ENST00000444221	0.857072
hsa-miR-4267	CEP76	ENSG00000101624 (CEP76)	ENST00000593250	0.785066
hsa-miR-4267	CEP85	ENSG00000130695 (CEP85)	ENST00000252992	0.712942
hsa-miR-4267	CEP85L	ENSG00000111860 (CEP85L)	ENST00000368491	0.884284
hsa-miR-4267	CERS2	ENSG00000143418 (CERS2)	ENST00000368954	0.705254
hsa-miR-4267	CERS5	ENSG00000139624 (CERS5)	ENST00000380189	0.92485
hsa-miR-4267	CFLAR	ENSG00000003402 (CFLAR)	ENST00000309955	0.782023
hsa-miR-4267	CHAC1	ENSG00000128965 (CHAC1)	ENST00000446533	0.763902
hsa-miR-4267	CHCHD6	ENSG00000159685 (CHCHD6)	ENST00000503119	0.75397
hsa-miR-4267	CHD4	ENSG00000111642 (CHD4)	ENST00000357008	0.761981
hsa-miR-4267	CHD6	ENSG00000124177 (CHD6)	ENST00000373233	0.735322
hsa-miR-4267	CHD8	ENSG00000100888 (CHD8)	ENST00000430710	0.941804
hsa-miR-4267	CHID1	ENSG00000177830 (CHID1)	ENST00000449825	0.72723
hsa-miR-4267	CHMP1B	ENSG00000255112 (CHMP1B)	ENST00000526991	0.783293
hsa-miR-4267	CHMP4A	ENSG00000254505 (CHMP4A)	ENST00000533523	0.71321
hsa-miR-4267	CHMP7	ENSG00000147457 (CHMP7)	ENST00000517325	0.781599
hsa-miR-4267	CHP2	ENSG00000166869 (CHP2)	ENST00000300113	0.860827
hsa-miR-4267	CHRD	ENSG00000090539 (CHRD)	ENST00000448472	0.958126
hsa-miR-4267	CHRDL1	ENSG00000101938 (CHRDL1)	ENST00000372045	0.877755
hsa-miR-4267	CHRM2	ENSG00000181072 (CHRM2)	ENST00000445907	0.782608
hsa-miR-4267	CHRNB2	ENSG00000160716 (CHRNB2)	ENST00000368476	0.730169
hsa-miR-4267	CHTOP	ENSG00000160679 (CHTOP)	ENST00000368686	0.73462
hsa-miR-4267	CIITA	ENSG00000179583 (CIITA)	ENST00000324288	0.793862
hsa-miR-4267	CIPC	ENSG00000198894 (CIPC)	ENST00000361786	0.759802
hsa-miR-4267	CIRBP	ENSG00000099622 (CIRBP)	ENST00000587169	0.831863
hsa-miR-4267	CISH	ENSG00000114737 (CISH)	ENST00000443053	0.810792
hsa-miR-4267	CKB	ENSG00000166165 (CKB)	ENST00000553652	0.746965
hsa-miR-4267	CLDN18	ENSG00000066405 (CLDN18)	ENST00000343735	0.750579
hsa-miR-4267	CLEC17A	ENSG00000187912 (CLEC17A)	ENST00000547437	0.74746
hsa-miR-4267	CLLU1	ENSG00000257127 (CLLU1)	ENST00000378485	0.818068
hsa-miR-4267	CLMN	ENSG00000165959 (CLMN)	ENST00000298912	0.862349
hsa-miR-4267	CLSTN2	ENSG00000158258 (CLSTN2)	ENST00000458420	0.763603
hsa-miR-4267	CLTA	ENSG00000122705 (CLTA)	ENST00000464497	0.822034
hsa-miR-4267	CLTB	ENSG00000175416 (CLTB)	ENST00000510734	0.868519
hsa-miR-4267	CLTCL1	ENSG00000070371 (CLTCL1)	ENST00000505027	0.797593
hsa-miR-4267	CLVS2	ENSG00000146352 (CLVS2)	ENST00000275162	0.934317
hsa-miR-4267	CMTM7	ENSG00000153551 (CMTM7)	ENST00000334983	0.708833
hsa-miR-4267	CNBD2	ENSG00000149646 (CNBD2)	ENST00000463258	0.899249
hsa-miR-4267	CNBP	ENSG00000169714 (CNBP)	ENST00000422453	0.811635
hsa-miR-4267	CNKSR3	ENSG00000153721 (CNKSR3)	ENST00000607772	0.862686
hsa-miR-4267	CNNM2	ENSG00000148842 (CNNM2)	ENST00000369878	0.813742
hsa-miR-4267	CNOT7	ENSG00000198791 (CNOT7)	ENST00000361272	0.727515
hsa-miR-4267	CNR1	ENSG00000118432 (CNR1)	ENST00000537554	0.752881
hsa-miR-4267	CNTN2	ENSG00000184144 (CNTN2)	ENST00000331830	0.764053
hsa-miR-4267	CNTROB	ENSG00000170037 (CNTROB)	ENST00000571632	0.975577
hsa-miR-4267	COG4	ENSG00000103051 (COG4)	ENST00000564415	0.701891
hsa-miR-4267	COG8	ENSG00000213380 (COG8)	ENST00000306875	0.701322
hsa-miR-4267	COL22A1	ENSG00000169436 (COL22A1)	ENST00000303045	0.731171
hsa-miR-4267	COL24A1	ENSG00000171502 (COL24A1)	ENST00000426639	0.821518
hsa-miR-4267	COL27A1	ENSG00000196739 (COL27A1)	ENST00000494090	0.753828
hsa-miR-4267	COL4A3BP	ENSG00000113163 (COL4A3BP)	ENST00000380494	0.891333
hsa-miR-4267	COL6A6	ENSG00000206384 (COL6A6)	ENST00000506143	0.845203
hsa-miR-4267	COMMD3	ENSG00000148444 (COMMD3)	ENST00000448361	0.771506
hsa-miR-4267	COPS2	ENSG00000166200 (COPS2)	ENST00000388901	0.95827
hsa-miR-4267	COPS3	ENSG00000141030 (COPS3)	ENST00000578317	0.738024
hsa-miR-4267	COPS7A	ENSG00000111652 (COPS7A)	ENST00000543939	0.836215
hsa-miR-4267	COPS7B	ENSG00000144524 (COPS7B)	ENST00000413197	0.71694
hsa-miR-4267	COQ6	ENSG00000119723 (COQ6)	ENST00000554341	0.805062
hsa-miR-4267	CORO1C	ENSG00000110880 (CORO1C)	ENST00000261401	0.731926
hsa-miR-4267	CORO2A	ENSG00000106789 (CORO2A)	ENST00000375077	0.983609
hsa-miR-4267	CORO7	ENSG00000262246 (CORO7)	ENST00000571227	0.802898
hsa-miR-4267	COX15	ENSG00000014919 (COX15)	ENST00000370483	0.713421
hsa-miR-4267	CPAMD8	ENSG00000160111 (CPAMD8)	ENST00000594249	0.711869
hsa-miR-4267	CPD	ENSG00000108582 (CPD)	ENST00000225719	0.764865
hsa-miR-4267	CPEB1	ENSG00000214575 (CPEB1)	ENST00000450751	0.71223
hsa-miR-4267	CPEB3	ENSG00000107864 (CPEB3)	ENST00000412050	0.737419
hsa-miR-4267	CPED1	ENSG00000106034 (CPED1)	ENST00000310396	0.733293
hsa-miR-4267	CPNE6	ENSG00000100884 (CPNE6)	ENST00000558795	0.761414
hsa-miR-4267	CPSF3L	ENSG00000127054 (CPSF3L)	ENST00000458452	0.948744
hsa-miR-4267	CRAT	ENSG00000095321 (CRAT)	ENST00000458362	0.966467
hsa-miR-4267	CRIM1	ENSG00000150938 (CRIM1)	ENST00000280527	0.724283
hsa-miR-4267	CRK	ENSG00000167193 (CRK)	ENST00000398970	0.702107
hsa-miR-4267	CRLS1	ENSG00000088766 (CRLS1)	ENST00000378863	0.965558
hsa-miR-4267	CRNKL1	ENSG00000101343 (CRNKL1)	ENST00000490910	0.740369
hsa-miR-4267	CROCC	ENSG00000058453 (CROCC)	ENST00000375541	0.848402
hsa-miR-4267	CSF3	ENSG00000108342 (CSF3)	ENST00000579852	0.720429
hsa-miR-4267	CSPG4	ENSG00000173546 (CSPG4)	ENST00000308508	0.904914
hsa-miR-4267	CSRNP2	ENSG00000110925 (CSRNP2)	ENST00000228515	0.884676
hsa-miR-4267	CTB-50L17.14	ENSG00000267385 (CTB-50L17.14)	ENST00000586020	0.887055
hsa-miR-4267	CTC1	ENSG00000178971 (CTC1)	ENST00000449476	0.961861
hsa-miR-4267	CTD-2192J16.20	ENSG00000269693 (CTD-2192J16.20)	ENST00000593682	0.780697
hsa-miR-4267	CTD-2368P22.1	ENSG00000176593 (CTD-2368P22.1)	ENST00000550135	0.915776
hsa-miR-4267	CTD-2510F5.6	ENSG00000265303 (CTD-2510F5.6)	ENST00000577660	0.719051
hsa-miR-4267	CTD-2587H24.4	ENSG00000267110 (CTD-2587H24.4)	ENST00000587871	0.782164
hsa-miR-4267	CTD-3088G3.8	ENSG00000188897 (CTD-3088G3.8)	ENST00000595170	0.842715
hsa-miR-4267	CTIF	ENSG00000134030 (CTIF)	ENST00000256413	0.791067
hsa-miR-4267	CTLA4	ENSG00000163599 (CTLA4)	ENST00000302823	0.762334
hsa-miR-4267	CTNNA3	ENSG00000183230 (CTNNA3)	ENST00000433211	0.78848
hsa-miR-4267	CTNNBIP1	ENSG00000178585 (CTNNBIP1)	ENST00000377263	0.748528
hsa-miR-4267	CTNND2	ENSG00000169862 (CTNND2)	ENST00000504499	0.787449
hsa-miR-4267	CTRC	ENSG00000162438 (CTRC)	ENST00000375943	0.743468
hsa-miR-4267	CTSD	ENSG00000117984 (CTSD)	ENST00000433655	0.727397
hsa-miR-4267	CTTNBP2	ENSG00000077063 (CTTNBP2)	ENST00000441556	0.828039
hsa-miR-4267	CTTNBP2NL	ENSG00000143079 (CTTNBP2NL)	ENST00000271277	0.946888
hsa-miR-4267	CUL5	ENSG00000166266 (CUL5)	ENST00000393094	0.780388
hsa-miR-4267	CUL7	ENSG00000044090 (CUL7)	ENST00000265348	0.794553
hsa-miR-4267	CUL9	ENSG00000112659 (CUL9)	ENST00000506830	0.835242
hsa-miR-4267	CXADR	ENSG00000154639 (CXADR)	ENST00000284878	0.710733
hsa-miR-4267	CXCL9	ENSG00000138755 (CXCL9)	ENST00000264888	0.892215
hsa-miR-4267	CXCR1	ENSG00000163464 (CXCR1)	ENST00000295683	0.741641
hsa-miR-4267	CYB561D1	ENSG00000174151 (CYB561D1)	ENST00000430195	0.701173
hsa-miR-4267	CYB5R4	ENSG00000065615 (CYB5R4)	ENST00000369681	0.762802
hsa-miR-4267	CYFIP2	ENSG00000055163 (CYFIP2)	ENST00000523969	0.824177
hsa-miR-4267	CYLD	ENSG00000083799 (CYLD)	ENST00000540145	0.757677
hsa-miR-4267	CYTH2	ENSG00000105443 (CYTH2)	ENST00000427476	0.773599
hsa-miR-4267	DAAM1	ENSG00000100592 (DAAM1)	ENST00000395125	0.716689
hsa-miR-4267	DAAM2	ENSG00000146122 (DAAM2)	ENST00000538976	0.720007
hsa-miR-4267	DACT3	ENSG00000197380 (DACT3)	ENST00000410105	0.707506
hsa-miR-4267	DAGLA	ENSG00000134780 (DAGLA)	ENST00000540717	0.80599
hsa-miR-4267	DAPK1	ENSG00000196730 (DAPK1)	ENST00000489291	0.718625
hsa-miR-4267	DBNL	ENSG00000136279 (DBNL)	ENST00000432854	0.704992
hsa-miR-4267	DCAF10	ENSG00000122741 (DCAF10)	ENST00000242323	0.763451
hsa-miR-4267	DCAF11	ENSG00000100897 (DCAF11)	ENST00000557802	0.996957
hsa-miR-4267	DCAF4	ENSG00000119599 (DCAF4)	ENST00000553457	0.798152
hsa-miR-4267	DCAF7	ENSG00000136485 (DCAF7)	ENST00000310827	0.85843
hsa-miR-4267	DCHS1	ENSG00000166341 (DCHS1)	ENST00000299441	0.702717
hsa-miR-4267	DCST2	ENSG00000163354 (DCST2)	ENST00000467991	0.992105
hsa-miR-4267	DCTD	ENSG00000129187 (DCTD)	ENST00000507543	0.72102
hsa-miR-4267	DCTN1	ENSG00000204843 (DCTN1)	ENST00000434055	0.874169
hsa-miR-4267	DCTN2	ENSG00000175203 (DCTN2)	ENST00000549394	0.999865
hsa-miR-4267	DCTN6	ENSG00000104671 (DCTN6)	ENST00000523666	0.817092
hsa-miR-4267	DCX	ENSG00000077279 (DCX)	ENST00000371993	0.746354
hsa-miR-4267	DDI2	ENSG00000197312 (DDI2)	ENST00000480945	0.838418
hsa-miR-4267	DDR1	ENSG00000204580 (DDR1)	ENST00000446312	0.788571
hsa-miR-4267	DDX25	ENSG00000109832 (DDX25)	ENST00000530414	0.96242
hsa-miR-4267	DDX49	ENSG00000105671 (DDX49)	ENST00000602113	0.906616
hsa-miR-4267	DDX56	ENSG00000136271 (DDX56)	ENST00000446987	0.823849
hsa-miR-4267	DGCR2	ENSG00000070413 (DGCR2)	ENST00000545799	0.721553
hsa-miR-4267	DGCR6	ENSG00000183628 (DGCR6)	ENST00000483718	0.916096
hsa-miR-4267	DGCR6L	ENSG00000128185 (DGCR6L)	ENST00000443409	0.896213
hsa-miR-4267	DGKA	ENSG00000065357 (DGKA)	ENST00000402956	0.709382
hsa-miR-4267	DGKD	ENSG00000077044 (DGKD)	ENST00000430834	0.724516
hsa-miR-4267	DGKE	ENSG00000153933 (DGKE)	ENST00000284061	0.769907
hsa-miR-4267	DGKI	ENSG00000157680 (DGKI)	ENST00000453654	0.857563
hsa-miR-4267	DGKQ	ENSG00000145214 (DGKQ)	ENST00000273814	0.760973
hsa-miR-4267	DGKZ	ENSG00000149091 (DGKZ)	ENST00000524984	0.935291
hsa-miR-4267	DHTKD1	ENSG00000181192 (DHTKD1)	ENST00000263035	0.760744
hsa-miR-4267	DHX30	ENSG00000132153 (DHX30)	ENST00000395745	0.871343
hsa-miR-4267	DIAPH1	ENSG00000131504 (DIAPH1)	ENST00000389054	0.746311
hsa-miR-4267	DIAPH2	ENSG00000147202 (DIAPH2)	ENST00000324765	0.766411
hsa-miR-4267	DIEXF	ENSG00000117597 (DIEXF)	ENST00000491415	0.738882
hsa-miR-4267	DIRAS1	ENSG00000176490 (DIRAS1)	ENST00000323469	0.731099
hsa-miR-4267	DIS3	ENSG00000083520 (DIS3)	ENST00000377767	0.846961
hsa-miR-4267	DKFZP761K2322	ENSG00000272268 (DKFZP761K2322)	ENST00000391666	0.930306
hsa-miR-4267	DKK2	ENSG00000155011 (DKK2)	ENST00000285311	0.707409
hsa-miR-4267	DLG5	ENSG00000151208 (DLG5)	ENST00000468332	0.978925
hsa-miR-4267	DMGDH	ENSG00000132837 (DMGDH)	ENST00000518477	0.757614
hsa-miR-4267	DMRT2	ENSG00000173253 (DMRT2)	ENST00000259622	0.816898
hsa-miR-4267	DNAH11	ENSG00000105877 (DNAH11)	ENST00000409508	0.715075
hsa-miR-4267	DNAH2	ENSG00000183914 (DNAH2)	ENST00000574518	0.780015
hsa-miR-4267	DNAH3	ENSG00000158486 (DNAH3)	ENST00000415178	0.988647
hsa-miR-4267	DNAJA4	ENSG00000140403 (DNAJA4)	ENST00000343789	0.868714
hsa-miR-4267	DNAJB2	ENSG00000135924 (DNAJB2)	ENST00000336576	0.94258
hsa-miR-4267	DNAJB5	ENSG00000137094 (DNAJB5)	ENST00000538278	0.724979
hsa-miR-4267	DNAJC1	ENSG00000136770 (DNAJC1)	ENST00000376946	0.721802
hsa-miR-4267	DNAJC10	ENSG00000077232 (DNAJC10)	ENST00000264065	0.757018
hsa-miR-4267	DNHD1	ENSG00000179532 (DNHD1)	ENST00000532027	0.968775
hsa-miR-4267	DNPEP	ENSG00000123992 (DNPEP)	ENST00000373966	0.981731
hsa-miR-4267	DOCK1	ENSG00000150760 (DOCK1)	ENST00000280333	0.724276
hsa-miR-4267	DOCK2	ENSG00000134516 (DOCK2)	ENST00000524185	0.960433
hsa-miR-4267	DOLPP1	ENSG00000167130 (DOLPP1)	ENST00000327812	0.734086
hsa-miR-4267	DPF1	ENSG00000011332 (DPF1)	ENST00000418517	0.767559
hsa-miR-4267	DPH2	ENSG00000132768 (DPH2)	ENST00000495421	0.809329
hsa-miR-4267	DRAXIN	ENSG00000162490 (DRAXIN)	ENST00000294485	0.855829
hsa-miR-4267	DRC1	ENSG00000157856 (DRC1)	ENST00000421869	0.999619
hsa-miR-4267	DROSHA	ENSG00000113360 (DROSHA)	ENST00000511367	0.724607
hsa-miR-4267	DST	ENSG00000151914 (DST)	ENST00000312431	0.985557
hsa-miR-4267	DTNBP1	ENSG00000047579 (DTNBP1)	ENST00000506844	0.758178
hsa-miR-4267	DUSP11	ENSG00000144048 (DUSP11)	ENST00000443070	0.903723
hsa-miR-4267	DUSP16	ENSG00000111266 (DUSP16)	ENST00000298573	0.832156
hsa-miR-4267	DUSP28	ENSG00000188542 (DUSP28)	ENST00000405954	0.834137
hsa-miR-4267	DUSP6	ENSG00000139318 (DUSP6)	ENST00000279488	0.959062
hsa-miR-4267	DUSP7	ENSG00000164086 (DUSP7)	ENST00000469623	0.807306
hsa-miR-4267	DYNC1I1	ENSG00000158560 (DYNC1I1)	ENST00000359388	0.833656
hsa-miR-4267	DYNC1LI1	ENSG00000144635 (DYNC1LI1)	ENST00000273130	0.706721
hsa-miR-4267	E2F2	ENSG00000007968 (E2F2)	ENST00000361729	0.834211
hsa-miR-4267	ECE1	ENSG00000117298 (ECE1)	ENST00000415912	0.755325
hsa-miR-4267	EDARADD	ENSG00000186197 (EDARADD)	ENST00000359362	0.72864
hsa-miR-4267	EEF1D	ENSG00000104529 (EEF1D)	ENST00000533833	0.730575
hsa-miR-4267	EFCAB3	ENSG00000172421 (EFCAB3)	ENST00000305286	0.723329
hsa-miR-4267	EFNB1	ENSG00000090776 (EFNB1)	ENST00000204961	0.710891
hsa-miR-4267	EHMT1	ENSG00000181090 (EHMT1)	ENST00000462942	0.923384
hsa-miR-4267	EHMT2	ENSG00000204371 (EHMT2)	ENST00000375537	0.749144
hsa-miR-4267	EI24	ENSG00000149547 (EI24)	ENST00000343678	0.805826
hsa-miR-4267	EIF2A	ENSG00000144895 (EIF2A)	ENST00000477551	0.91477
hsa-miR-4267	EIF2AK2	ENSG00000055332 (EIF2AK2)	ENST00000233057	0.882416
hsa-miR-4267	EIF3D	ENSG00000100353 (EIF3D)	ENST00000458572	0.714642
hsa-miR-4267	EIF4E3	ENSG00000163412 (EIF4E3)	ENST00000425534	0.721766
hsa-miR-4267	EIF4G1	ENSG00000114867 (EIF4G1)	ENST00000442406	0.952197
hsa-miR-4267	ELF4	ENSG00000102034 (ELF4)	ENST00000335997	0.799253
hsa-miR-4267	ELFN2	ENSG00000166897 (ELFN2)	ENST00000402918	0.702821
hsa-miR-4267	ELOVL6	ENSG00000170522 (ELOVL6)	ENST00000394607	0.747205
hsa-miR-4267	EMC3	ENSG00000125037 (EMC3)	ENST00000245046	0.708972
hsa-miR-4267	EME1	ENSG00000154920 (EME1)	ENST00000338165	0.79581
hsa-miR-4267	EMILIN2	ENSG00000132205 (EMILIN2)	ENST00000254528	0.703466
hsa-miR-4267	ENDOD1	ENSG00000149218 (ENDOD1)	ENST00000278505	0.785632
hsa-miR-4267	ENDOV	ENSG00000173818 (ENDOV)	ENST00000517795	0.734489
hsa-miR-4267	ENKD1	ENSG00000124074 (ENKD1)	ENST00000602644	0.857595
hsa-miR-4267	EPN3	ENSG00000049283 (EPN3)	ENST00000512379	0.763926
hsa-miR-4267	EPS8	ENSG00000151491 (EPS8)	ENST00000543468	0.790387
hsa-miR-4267	EPS8L2	ENSG00000177106 (EPS8L2)	ENST00000526909	0.972154
hsa-miR-4267	EPT1	ENSG00000138018 (EPT1)	ENST00000260585	0.750769
hsa-miR-4267	ERBB2	ENSG00000141736 (ERBB2)	ENST00000578373	0.744517
hsa-miR-4267	ERP29	ENSG00000089248 (ERP29)	ENST00000455836	0.892198
hsa-miR-4267	ERVW-1	ENSG00000242950 (ERVW-1)	ENST00000603053	0.932656
hsa-miR-4267	ESPL1	ENSG00000135476 (ESPL1)	ENST00000552671	0.948265
hsa-miR-4267	ESR2	ENSG00000140009 (ESR2)	ENST00000557772	0.772506
hsa-miR-4267	ESRRB	ENSG00000119715 (ESRRB)	ENST00000380887	0.800206
hsa-miR-4267	ESYT1	ENSG00000139641 (ESYT1)	ENST00000394048	0.807763
hsa-miR-4267	EVC2	ENSG00000173040 (EVC2)	ENST00000509670	0.847537
hsa-miR-4267	EVL	ENSG00000196405 (EVL)	ENST00000544450	0.801578
hsa-miR-4267	EVPLL	ENSG00000214860 (EVPLL)	ENST00000399134	0.883323
hsa-miR-4267	EXOC3L4	ENSG00000205436 (EXOC3L4)	ENST00000559661	0.720613
hsa-miR-4267	EXTL1	ENSG00000158008 (EXTL1)	ENST00000374280	0.751284
hsa-miR-4267	EYA2	ENSG00000064655 (EYA2)	ENST00000497062	0.903152
hsa-miR-4267	EZR	ENSG00000092820 (EZR)	ENST00000337147	0.705467
hsa-miR-4267	F11R	ENSG00000158769 (F11R)	ENST00000368026	0.708631
hsa-miR-4267	FADS3	ENSG00000221968 (FADS3)	ENST00000540820	0.846495
hsa-miR-4267	FAM117A	ENSG00000121104 (FAM117A)	ENST00000240364	0.785325
hsa-miR-4267	FAM134A	ENSG00000144567 (FAM134A)	ENST00000430297	0.802724
hsa-miR-4267	FAM134C	ENSG00000141699 (FAM134C)	ENST00000589797	0.775551
hsa-miR-4267	FAM135B	ENSG00000147724 (FAM135B)	ENST00000482951	0.756755
hsa-miR-4267	FAM160A1	ENSG00000164142 (FAM160A1)	ENST00000435205	0.71335
hsa-miR-4267	FAM168A	ENSG00000054965 (FAM168A)	ENST00000064778	0.853498
hsa-miR-4267	FAM174B	ENSG00000185442 (FAM174B)	ENST00000327355	0.865448
hsa-miR-4267	FAM186B	ENSG00000135436 (FAM186B)	ENST00000533372	0.712748
hsa-miR-4267	FAM193A	ENSG00000125386 (FAM193A)	ENST00000512465	0.773998
hsa-miR-4267	FAM211A	ENSG00000181350 (FAM211A)	ENST00000409083	0.860965
hsa-miR-4267	FAM219A	ENSG00000164970 (FAM219A)	ENST00000379087	0.791581
hsa-miR-4267	FAM219B	ENSG00000178761 (FAM219B)	ENST00000569524	0.729229
hsa-miR-4267	FAM26E	ENSG00000178033 (FAM26E)	ENST00000368599	0.97105
hsa-miR-4267	FAM53A	ENSG00000174137 (FAM53A)	ENST00000308132	0.763108
hsa-miR-4267	FAM53B	ENSG00000189319 (FAM53B)	ENST00000337318	0.938966
hsa-miR-4267	FAM53C	ENSG00000120709 (FAM53C)	ENST00000239906	0.835571
hsa-miR-4267	FAM63B	ENSG00000128923 (FAM63B)	ENST00000559228	0.959897
hsa-miR-4267	FAM65B	ENSG00000111913 (FAM65B)	ENST00000259698	0.753132
hsa-miR-4267	FAM73B	ENSG00000148343 (FAM73B)	ENST00000439290	0.81938
hsa-miR-4267	FAM83F	ENSG00000133477 (FAM83F)	ENST00000333407	0.920682
hsa-miR-4267	FAM83G	ENSG00000188522 (FAM83G)	ENST00000388995	0.707902
hsa-miR-4267	FAM83H	ENSG00000180921 (FAM83H)	ENST00000388913	0.753793
hsa-miR-4267	FAN1	ENSG00000198690 (FAN1)	ENST00000565280	0.963316
hsa-miR-4267	FANCG	ENSG00000221829 (FANCG)	ENST00000425676	0.999762
hsa-miR-4267	FANCL	ENSG00000115392 (FANCL)	ENST00000403295	0.970005
hsa-miR-4267	FARSA	ENSG00000179115 (FARSA)	ENST00000586146	0.718063
hsa-miR-4267	FAXC	ENSG00000146267 (FAXC)	ENST00000389677	0.869795
hsa-miR-4267	FBF1	ENSG00000188878 (FBF1)	ENST00000586717	0.716807
hsa-miR-4267	FBXL14	ENSG00000171823 (FBXL14)	ENST00000339235	0.731614
hsa-miR-4267	FBXO10	ENSG00000147912 (FBXO10)	ENST00000276960	0.824512
hsa-miR-4267	FBXO32	ENSG00000156804 (FBXO32)	ENST00000517956	0.705186
hsa-miR-4267	FBXO40	ENSG00000163833 (FBXO40)	ENST00000338040	0.845719
hsa-miR-4267	FBXW11	ENSG00000072803 (FBXW11)	ENST00000296933	0.748588
hsa-miR-4267	FBXW2	ENSG00000119402 (FBXW2)	ENST00000608872	0.76677
hsa-miR-4267	FBXW8	ENSG00000174989 (FBXW8)	ENST00000455858	0.81942
hsa-miR-4267	FCGRT	ENSG00000104870 (FCGRT)	ENST00000598319	0.707865
hsa-miR-4267	FCHSD1	ENSG00000197948 (FCHSD1)	ENST00000435817	0.99252
hsa-miR-4267	FCRL4	ENSG00000163518 (FCRL4)	ENST00000271532	0.767793
hsa-miR-4267	FDFT1	ENSG00000079459 (FDFT1)	ENST00000525607	0.706549
hsa-miR-4267	FDXR	ENSG00000161513 (FDXR)	ENST00000579482	0.743638
hsa-miR-4267	FGF7	ENSG00000140285 (FGF7)	ENST00000267843	0.922149
hsa-miR-4267	FGFR1OP	ENSG00000213066 (FGFR1OP)	ENST00000366847	0.796798
hsa-miR-4267	FKBP6	ENSG00000077800 (FKBP6)	ENST00000445032	0.775139
hsa-miR-4267	FLII	ENSG00000177731 (FLII)	ENST00000578101	0.980783
hsa-miR-4267	FLJ00418	ENSG00000268927 (FLJ00418)	ENST00000597002	0.994596
hsa-miR-4267	FLNA	ENSG00000196924 (FLNA)	ENST00000420627	0.829174
hsa-miR-4267	FLNB	ENSG00000136068 (FLNB)	ENST00000357272	0.718163
hsa-miR-4267	FLYWCH1	ENSG00000059122 (FLYWCH1)	ENST00000253928	0.76976
hsa-miR-4267	FN3KRP	ENSG00000141560 (FN3KRP)	ENST00000574832	0.749371
hsa-miR-4267	FOLH1	ENSG00000086205 (FOLH1)	ENST00000525826	0.770006
hsa-miR-4267	FOS	ENSG00000170345 (FOS)	ENST00000303562	0.870462
hsa-miR-4267	FOXA1	ENSG00000129514 (FOXA1)	ENST00000250448	0.712841
hsa-miR-4267	FOXD4L3	ENSG00000187559 (FOXD4L3)	ENST00000342833	0.788787
hsa-miR-4267	FOXD4L6	ENSG00000204793 (FOXD4L6)	ENST00000377473	0.774165
hsa-miR-4267	FOXI1	ENSG00000168269 (FOXI1)	ENST00000449804	0.727736
hsa-miR-4267	FOXJ3	ENSG00000198815 (FOXJ3)	ENST00000372572	0.706926
hsa-miR-4267	FOXP4	ENSG00000137166 (FOXP4)	ENST00000373063	0.868935
hsa-miR-4267	FRMD4B	ENSG00000114541 (FRMD4B)	ENST00000398540	0.715405
hsa-miR-4267	FSTL1	ENSG00000163430 (FSTL1)	ENST00000295633	0.753388
hsa-miR-4267	FUT9	ENSG00000172461 (FUT9)	ENST00000302103	0.830121
hsa-miR-4267	FYCO1	ENSG00000163820 (FYCO1)	ENST00000296137	0.821881
hsa-miR-4267	FYTTD1	ENSG00000122068 (FYTTD1)	ENST00000241502	0.878562
hsa-miR-4267	GABPB2	ENSG00000143458 (GABPB2)	ENST00000368918	0.835121
hsa-miR-4267	GALNT16	ENSG00000100626 (GALNT16)	ENST00000553471	0.801079
hsa-miR-4267	GALNT6	ENSG00000139629 (GALNT6)	ENST00000543196	0.820054
hsa-miR-4267	GANAB	ENSG00000089597 (GANAB)	ENST00000532402	0.805794
hsa-miR-4267	GART	ENSG00000159131 (GART)	ENST00000424203	0.93467
hsa-miR-4267	GAS2	ENSG00000148935 (GAS2)	ENST00000524701	0.779099
hsa-miR-4267	GAS8	ENSG00000141013 (GAS8)	ENST00000566266	0.999777
hsa-miR-4267	GATA4	ENSG00000136574 (GATA4)	ENST00000335135	0.720385
hsa-miR-4267	GBP3	ENSG00000117226 (GBP3)	ENST00000493594	0.756228
hsa-miR-4267	GCC2	ENSG00000135968 (GCC2)	ENST00000482325	0.932869
hsa-miR-4267	GDF11	ENSG00000135414 (GDF11)	ENST00000257868	0.754058
hsa-miR-4267	GDI2	ENSG00000057608 (GDI2)	ENST00000380191	0.888826
hsa-miR-4267	GDPD5	ENSG00000158555 (GDPD5)	ENST00000527820	0.811597
hsa-miR-4267	GEMIN6	ENSG00000152147 (GEMIN6)	ENST00000281950	0.774334
hsa-miR-4267	GGA3	ENSG00000125447 (GGA3)	ENST00000537584	0.974113
hsa-miR-4267	GGCX	ENSG00000115486 (GGCX)	ENST00000233838	0.701816
hsa-miR-4267	GIPR	ENSG00000010310 (GIPR)	ENST00000590918	0.886991
hsa-miR-4267	GJC2	ENSG00000198835 (GJC2)	ENST00000366714	0.774482
hsa-miR-4267	GLG1	ENSG00000090863 (GLG1)	ENST00000567951	0.94968
hsa-miR-4267	GLI2	ENSG00000074047 (GLI2)	ENST00000445186	0.718543
hsa-miR-4267	GLIS2	ENSG00000126603 (GLIS2)	ENST00000262366	0.729302
hsa-miR-4267	GLRX	ENSG00000173221 (GLRX)	ENST00000379979	0.913077
hsa-miR-4267	GLS	ENSG00000115419 (GLS)	ENST00000320717	0.954923
hsa-miR-4267	GMCL1	ENSG00000087338 (GMCL1)	ENST00000282570	0.728142
hsa-miR-4267	GMEB1	ENSG00000162419 (GMEB1)	ENST00000373816	0.724404
hsa-miR-4267	GMIP	ENSG00000089639 (GMIP)	ENST00000588171	0.859137
hsa-miR-4267	GMPPB	ENSG00000173540 (GMPPB)	ENST00000480687	0.885281
hsa-miR-4267	GNA12	ENSG00000146535 (GNA12)	ENST00000275364	0.713156
hsa-miR-4267	GNB1	ENSG00000078369 (GNB1)	ENST00000378609	0.754818
hsa-miR-4267	GNL3	ENSG00000163938 (GNL3)	ENST00000492349	0.722698
hsa-miR-4267	GNPNAT1	ENSG00000100522 (GNPNAT1)	ENST00000216410	0.966896
hsa-miR-4267	GOLGA4	ENSG00000144674 (GOLGA4)	ENST00000361924	0.824779
hsa-miR-4267	GOLGB1	ENSG00000173230 (GOLGB1)	ENST00000482512	0.998422
hsa-miR-4267	GORASP2	ENSG00000115806 (GORASP2)	ENST00000442798	0.771474
hsa-miR-4267	GPATCH1	ENSG00000076650 (GPATCH1)	ENST00000592165	0.792021
hsa-miR-4267	GPATCH4	ENSG00000160818 (GPATCH4)	ENST00000368232	0.891917
hsa-miR-4267	GPR63	ENSG00000112218 (GPR63)	ENST00000229955	0.729348
hsa-miR-4267	GPR82	ENSG00000171657 (GPR82)	ENST00000302548	0.768435
hsa-miR-4267	GPRASP2	ENSG00000158301 (GPRASP2)	ENST00000535209	0.998997
hsa-miR-4267	GPRIN2	ENSG00000204175 (GPRIN2)	ENST00000374314	0.725448
hsa-miR-4267	GPS1	ENSG00000169727 (GPS1)	ENST00000584460	0.932536
hsa-miR-4267	GREB1L	ENSG00000141449 (GREB1L)	ENST00000400483	0.862241
hsa-miR-4267	GRHL3	ENSG00000158055 (GRHL3)	ENST00000528064	0.825908
hsa-miR-4267	GRIN2A	ENSG00000183454 (GRIN2A)	ENST00000396573	0.787588
hsa-miR-4267	GRIN2B	ENSG00000273079 (GRIN2B)	ENST00000609686	0.788514
hsa-miR-4267	GRIN3A	ENSG00000198785 (GRIN3A)	ENST00000361820	0.827728
hsa-miR-4267	GSR	ENSG00000104687 (GSR)	ENST00000221130	0.710119
hsa-miR-4267	GSTM4	ENSG00000168765 (GSTM4)	ENST00000369833	0.834078
hsa-miR-4267	GSTM5	ENSG00000134201 (GSTM5)	ENST00000369813	0.707055
hsa-miR-4267	GSTT1	ENSG00000184674 (GSTT1)	ENST00000417489	0.716737
hsa-miR-4267	GSX2	ENSG00000180613 (GSX2)	ENST00000503800	0.945748
hsa-miR-4267	GTPBP4	ENSG00000107937 (GTPBP4)	ENST00000360803	0.716422
hsa-miR-4267	GUCY1A3	ENSG00000164116 (GUCY1A3)	ENST00000443668	0.950097
hsa-miR-4267	HABP4	ENSG00000130956 (HABP4)	ENST00000375251	0.941232
hsa-miR-4267	HAP1	ENSG00000173805 (HAP1)	ENST00000393939	0.756522
hsa-miR-4267	HAT1	ENSG00000128708 (HAT1)	ENST00000412731	0.741881
hsa-miR-4267	HAUS5	ENSG00000249115 (HAUS5)	ENST00000424522	0.996085
hsa-miR-4267	HAUS8	ENSG00000131351 (HAUS8)	ENST00000598517	0.779443
hsa-miR-4267	HCK	ENSG00000101336 (HCK)	ENST00000262651	0.792121
hsa-miR-4267	HDGFRP3	ENSG00000166503 (HDGFRP3)	ENST00000299633	0.721796
hsa-miR-4267	HEG1	ENSG00000173706 (HEG1)	ENST00000311127	0.80848
hsa-miR-4267	HEMK1	ENSG00000114735 (HEMK1)	ENST00000448997	0.956564
hsa-miR-4267	HEPH	ENSG00000089472 (HEPH)	ENST00000519389	0.741497
hsa-miR-4267	HERC2	ENSG00000128731 (HERC2)	ENST00000564734	0.89888
hsa-miR-4267	HEXA	ENSG00000213614 (HEXA)	ENST00000567411	0.814503
hsa-miR-4267	HEXDC	ENSG00000169660 (HEXDC)	ENST00000582429	0.758156
hsa-miR-4267	HHIPL1	ENSG00000182218 (HHIPL1)	ENST00000330710	0.872636
hsa-miR-4267	HIP1	ENSG00000127946 (HIP1)	ENST00000336926	0.717857
hsa-miR-4267	HIP1R	ENSG00000130787 (HIP1R)	ENST00000253083	0.765183
hsa-miR-4267	HIST1H2BJ	ENSG00000124635 (HIST1H2BJ)	ENST00000607124	0.873949
hsa-miR-4267	HIVEP3	ENSG00000127124 (HIVEP3)	ENST00000372584	0.818974
hsa-miR-4267	HMBS	ENSG00000256269 (HMBS)	ENST00000545621	0.764719
hsa-miR-4267	HMCN1	ENSG00000143341 (HMCN1)	ENST00000367492	0.765989
hsa-miR-4267	HMGN1	ENSG00000205581 (HMGN1)	ENST00000431390	0.781504
hsa-miR-4267	HMGN2	ENSG00000198830 (HMGN2)	ENST00000361427	0.932839
hsa-miR-4267	HMHA1	ENSG00000180448 (HMHA1)	ENST00000587602	0.918576
hsa-miR-4267	HNRNPC	ENSG00000092199 (HNRNPC)	ENST00000336053	0.878348
hsa-miR-4267	HNRNPM	ENSG00000099783 (HNRNPM)	ENST00000600806	0.90107
hsa-miR-4267	HOMER2	ENSG00000103942 (HOMER2)	ENST00000558090	0.853645
hsa-miR-4267	HOOK3	ENSG00000168172 (HOOK3)	ENST00000307602	0.963855
hsa-miR-4267	HOXB5	ENSG00000120075 (HOXB5)	ENST00000239151	0.845756
hsa-miR-4267	HS3ST2	ENSG00000122254 (HS3ST2)	ENST00000473392	0.742915
hsa-miR-4267	HSD11B1L	ENSG00000167733 (HSD11B1L)	ENST00000579562	0.816862
hsa-miR-4267	HSF5	ENSG00000176160 (HSF5)	ENST00000323777	0.993814
hsa-miR-4267	HTR6	ENSG00000158748 (HTR6)	ENST00000289753	0.761645
hsa-miR-4267	HTRA4	ENSG00000169495 (HTRA4)	ENST00000302495	0.735882
hsa-miR-4267	HTT	ENSG00000197386 (HTT)	ENST00000355072	0.713123
hsa-miR-4267	HUNK	ENSG00000142149 (HUNK)	ENST00000270112	0.800505
hsa-miR-4267	HYDIN	ENSG00000157423 (HYDIN)	ENST00000378856	0.72854
hsa-miR-4267	HYOU1	ENSG00000149428 (HYOU1)	ENST00000532519	0.713058
hsa-miR-4267	IBA57	ENSG00000181873 (IBA57)	ENST00000366711	0.888864
hsa-miR-4267	IBTK	ENSG00000005700 (IBTK)	ENST00000503400	0.864492
hsa-miR-4267	ICOS	ENSG00000163600 (ICOS)	ENST00000435193	0.740788
hsa-miR-4267	IFFO1	ENSG00000010295 (IFFO1)	ENST00000487279	0.998383
hsa-miR-4267	IFFO2	ENSG00000169991 (IFFO2)	ENST00000455833	0.768947
hsa-miR-4267	IFT122	ENSG00000163913 (IFT122)	ENST00000512220	0.903979
hsa-miR-4267	IFT172	ENSG00000138002 (IFT172)	ENST00000509128	0.8803
hsa-miR-4267	IGF1R	ENSG00000140443 (IGF1R)	ENST00000268035	0.732784
hsa-miR-4267	IGFL3	ENSG00000188624 (IGFL3)	ENST00000341415	0.952444
hsa-miR-4267	IGFLR1	ENSG00000126246 (IGFLR1)	ENST00000588018	0.934846
hsa-miR-4267	IKBKB	ENSG00000104365 (IKBKB)	ENST00000342222	0.971261
hsa-miR-4267	IKBKG	ENSG00000073009 (IKBKG)	ENST00000393549	0.843105
hsa-miR-4267	IKZF3	ENSG00000161405 (IKZF3)	ENST00000293068	0.956999
hsa-miR-4267	IL11RA	ENSG00000137070 (IL11RA)	ENST00000555247	0.87157
hsa-miR-4267	IL17RE	ENSG00000163701 (IL17RE)	ENST00000383815	0.812086
hsa-miR-4267	IL1RL2	ENSG00000115598 (IL1RL2)	ENST00000264257	0.910314
hsa-miR-4267	IL20RB	ENSG00000174564 (IL20RB)	ENST00000469964	0.739833
hsa-miR-4267	IL21R	ENSG00000103522 (IL21R)	ENST00000395755	0.704913
hsa-miR-4267	ILF3	ENSG00000129351 (ILF3)	ENST00000449870	0.793937
hsa-miR-4267	IMPG2	ENSG00000081148 (IMPG2)	ENST00000193391	0.707094
hsa-miR-4267	INMT-FAM188B	ENSG00000254959 (INMT-FAM188B)	ENST00000458257	0.907701
hsa-miR-4267	INO80	ENSG00000128908 (INO80)	ENST00000558357	0.828204
hsa-miR-4267	INO80D	ENSG00000114933 (INO80D)	ENST00000403263	0.872043
hsa-miR-4267	IPO9	ENSG00000198700 (IPO9)	ENST00000361565	0.833056
hsa-miR-4267	IQCC	ENSG00000160051 (IQCC)	ENST00000291358	0.858154
hsa-miR-4267	IREB2	ENSG00000136381 (IREB2)	ENST00000258886	0.908014
hsa-miR-4267	IRF2	ENSG00000168310 (IRF2)	ENST00000393593	0.746343
hsa-miR-4267	IRF6	ENSG00000117595 (IRF6)	ENST00000367021	0.874641
hsa-miR-4267	IRF7	ENSG00000185507 (IRF7)	ENST00000533182	0.93446
hsa-miR-4267	IRGQ	ENSG00000167378 (IRGQ)	ENST00000422989	0.962802
hsa-miR-4267	IST1	ENSG00000182149 (IST1)	ENST00000439924	0.927903
hsa-miR-4267	ISX	ENSG00000175329 (ISX)	ENST00000308700	0.814954
hsa-miR-4267	ISY1-RAB43	ENSG00000261796 (ISY1-RAB43)	ENST00000418265	0.776105
hsa-miR-4267	ITFG2	ENSG00000111203 (ITFG2)	ENST00000540929	0.809893
hsa-miR-4267	ITGA10	ENSG00000143127 (ITGA10)	ENST00000369304	0.829209
hsa-miR-4267	ITGA8	ENSG00000077943 (ITGA8)	ENST00000378076	0.704082
hsa-miR-4267	ITGB2	ENSG00000160255 (ITGB2)	ENST00000523323	0.740685
hsa-miR-4267	ITPRIP	ENSG00000148841 (ITPRIP)	ENST00000337478	0.904194
hsa-miR-4267	ITSN1	ENSG00000205726 (ITSN1)	ENST00000381318	0.776452
hsa-miR-4267	IVL	ENSG00000163207 (IVL)	ENST00000368764	0.716554
hsa-miR-4267	IZUMO4	ENSG00000099840 (IZUMO4)	ENST00000395307	0.737205
hsa-miR-4267	JAG1	ENSG00000101384 (JAG1)	ENST00000254958	0.733262
hsa-miR-4267	JAKMIP3	ENSG00000188385 (JAKMIP3)	ENST00000298622	0.903323
hsa-miR-4267	KANSL3	ENSG00000114982 (KANSL3)	ENST00000354204	0.851912
hsa-miR-4267	KARS	ENSG00000065427 (KARS)	ENST00000564578	0.842899
hsa-miR-4267	KAT2A	ENSG00000108773 (KAT2A)	ENST00000465682	0.736586
hsa-miR-4267	KAT2B	ENSG00000114166 (KAT2B)	ENST00000263754	0.707327
hsa-miR-4267	KAZN	ENSG00000189337 (KAZN)	ENST00000376030	0.735641
hsa-miR-4267	KBTBD11	ENSG00000176595 (KBTBD11)	ENST00000320248	0.744422
hsa-miR-4267	KBTBD13	ENSG00000234438 (KBTBD13)	ENST00000432196	0.819725
hsa-miR-4267	KCND1	ENSG00000102057 (KCND1)	ENST00000376477	0.896897
hsa-miR-4267	KCNE4	ENSG00000152049 (KCNE4)	ENST00000281830	0.844383
hsa-miR-4267	KCNH5	ENSG00000140015 (KCNH5)	ENST00000322893	0.869529
hsa-miR-4267	KCNH6	ENSG00000173826 (KCNH6)	ENST00000583465	0.854254
hsa-miR-4267	KCNH8	ENSG00000183960 (KCNH8)	ENST00000452398	0.80877
hsa-miR-4267	KCNJ8	ENSG00000121361 (KCNJ8)	ENST00000240662	0.93939
hsa-miR-4267	KCNK10	ENSG00000100433 (KCNK10)	ENST00000340700	0.728716
hsa-miR-4267	KDM3A	ENSG00000115548 (KDM3A)	ENST00000441719	0.778617
hsa-miR-4267	KDM6B	ENSG00000132510 (KDM6B)	ENST00000254846	0.716905
hsa-miR-4267	KIAA0087	ENSG00000122548 (KIAA0087)	ENST00000242109	0.713009
hsa-miR-4267	KIAA0226L	ENSG00000102445 (KIAA0226L)	ENST00000378781	0.767763
hsa-miR-4267	KIAA0247	ENSG00000100647 (KIAA0247)	ENST00000342745	0.746044
hsa-miR-4267	KIAA0355	ENSG00000166398 (KIAA0355)	ENST00000299505	0.713026
hsa-miR-4267	KIAA0368	ENSG00000136813 (KIAA0368)	ENST00000338205	0.715403
hsa-miR-4267	KIAA0556	ENSG00000047578 (KIAA0556)	ENST00000261588	0.791017
hsa-miR-4267	KIAA0753	ENSG00000198920 (KIAA0753)	ENST00000570790	0.892101
hsa-miR-4267	KIAA0907	ENSG00000132680 (KIAA0907)	ENST00000368320	0.866235
hsa-miR-4267	KIAA0930	ENSG00000100364 (KIAA0930)	ENST00000336156	0.854581
hsa-miR-4267	KIAA1191	ENSG00000122203 (KIAA1191)	ENST00000298569	0.745039
hsa-miR-4267	KIAA1199	ENSG00000103888 (KIAA1199)	ENST00000220244	0.911654
hsa-miR-4267	KIAA1217	ENSG00000120549 (KIAA1217)	ENST00000376451	0.74912
hsa-miR-4267	KIAA1257	ENSG00000114656 (KIAA1257)	ENST00000265068	0.730204
hsa-miR-4267	KIAA1324	ENSG00000116299 (KIAA1324)	ENST00000527996	0.812624
hsa-miR-4267	KIAA1407	ENSG00000163617 (KIAA1407)	ENST00000460813	0.951317
hsa-miR-4267	KIAA1432	ENSG00000107036 (KIAA1432)	ENST00000414202	0.718749
hsa-miR-4267	KIAA1462	ENSG00000165757 (KIAA1462)	ENST00000375377	0.793846
hsa-miR-4267	KIAA1614	ENSG00000135835 (KIAA1614)	ENST00000367588	0.746838
hsa-miR-4267	KIAA1644	ENSG00000138944 (KIAA1644)	ENST00000381176	0.716931
hsa-miR-4267	KIAA1755	ENSG00000149633 (KIAA1755)	ENST00000279024	0.726344
hsa-miR-4267	KIAA2018	ENSG00000176542 (KIAA2018)	ENST00000316407	0.731587
hsa-miR-4267	KIDINS220	ENSG00000134313 (KIDINS220)	ENST00000488729	0.931424
hsa-miR-4267	KIF15	ENSG00000163808 (KIF15)	ENST00000438321	0.960174
hsa-miR-4267	KIF26B	ENSG00000162849 (KIF26B)	ENST00000366518	0.755286
hsa-miR-4267	KIF5A	ENSG00000155980 (KIF5A)	ENST00000455537	0.894274
hsa-miR-4267	KIF6	ENSG00000164627 (KIF6)	ENST00000458470	0.709546
hsa-miR-4267	KIRREL	ENSG00000183853 (KIRREL)	ENST00000368172	0.717826
hsa-miR-4267	KLC4	ENSG00000137171 (KLC4)	ENST00000467906	0.840325
hsa-miR-4267	KLF12	ENSG00000118922 (KLF12)	ENST00000377669	0.889869
hsa-miR-4267	KLF13	ENSG00000169926 (KLF13)	ENST00000307145	0.703269
hsa-miR-4267	KLHDC7A	ENSG00000179023 (KLHDC7A)	ENST00000400664	0.713654
hsa-miR-4267	KLHL3	ENSG00000146021 (KLHL3)	ENST00000508657	0.923335
hsa-miR-4267	KLHL42	ENSG00000087448 (KLHL42)	ENST00000381271	0.774722
hsa-miR-4267	KLHL9	ENSG00000198642 (KLHL9)	ENST00000359039	0.757666
hsa-miR-4267	KLRG2	ENSG00000188883 (KLRG2)	ENST00000340940	0.764647
hsa-miR-4267	KNDC1	ENSG00000171798 (KNDC1)	ENST00000368572	0.712792
hsa-miR-4267	KNOP1	ENSG00000103550 (KNOP1)	ENST00000219837	0.786305
hsa-miR-4267	KRBA1	ENSG00000133619 (KRBA1)	ENST00000496259	0.874765
hsa-miR-4267	KRT4	ENSG00000170477 (KRT4)	ENST00000548097	0.889687
hsa-miR-4267	KRT40	ENSG00000204889 (KRT40)	ENST00000461923	0.788828
hsa-miR-4267	KRT72	ENSG00000170486 (KRT72)	ENST00000550829	0.980371
hsa-miR-4267	KY	ENSG00000174611 (KY)	ENST00000503669	0.820588
hsa-miR-4267	L3MBTL2	ENSG00000100395 (L3MBTL2)	ENST00000452106	0.827824
hsa-miR-4267	LA16c-431H6.6	ENSG00000261732 (LA16c-431H6.6)	ENST00000454337	0.705935
hsa-miR-4267	LAIR1	ENSG00000167613 (LAIR1)	ENST00000391743	0.851616
hsa-miR-4267	LAMC1	ENSG00000135862 (LAMC1)	ENST00000258341	0.702484
hsa-miR-4267	LAMC2	ENSG00000058085 (LAMC2)	ENST00000264144	0.813277
hsa-miR-4267	LARP7	ENSG00000174720 (LARP7)	ENST00000509622	0.851097
hsa-miR-4267	LASP1	ENSG00000002834 (LASP1)	ENST00000318008	0.769338
hsa-miR-4267	LDLRAD2	ENSG00000187942 (LDLRAD2)	ENST00000344642	0.859191
hsa-miR-4267	LEMD3	ENSG00000174106 (LEMD3)	ENST00000308330	0.72435
hsa-miR-4267	LENG8	ENSG00000167615 (LENG8)	ENST00000431846	0.760019
hsa-miR-4267	LETM1	ENSG00000168924 (LETM1)	ENST00000302787	0.733587
hsa-miR-4267	LGALS3BP	ENSG00000108679 (LGALS3BP)	ENST00000587311	0.734211
hsa-miR-4267	LGR4	ENSG00000205213 (LGR4)	ENST00000389858	0.934256
hsa-miR-4267	LGR6	ENSG00000133067 (LGR6)	ENST00000487787	0.966691
hsa-miR-4267	LHX4	ENSG00000121454 (LHX4)	ENST00000263726	0.906652
hsa-miR-4267	LIG1	ENSG00000105486 (LIG1)	ENST00000594759	0.726869
hsa-miR-4267	LIMK1	ENSG00000106683 (LIMK1)	ENST00000336180	0.707957
hsa-miR-4267	LINC00923	ENSG00000251209 (LINC00923)	ENST00000503768	0.71037
hsa-miR-4267	LINC00999	ENSG00000225119 (LINC00999)	ENST00000423687	0.787528
hsa-miR-4267	LLGL1	ENSG00000131899 (LLGL1)	ENST00000316843	0.715056
hsa-miR-4267	LMAN1	ENSG00000074695 (LMAN1)	ENST00000251047	0.87268
hsa-miR-4267	LMAN2L	ENSG00000114988 (LMAN2L)	ENST00000434524	0.721685
hsa-miR-4267	LMNB2	ENSG00000176619 (LMNB2)	ENST00000325327	0.70332
hsa-miR-4267	LMOD1	ENSG00000163431 (LMOD1)	ENST00000367288	0.891465
hsa-miR-4267	LOH12CR2	ENSG00000205791 (LOH12CR2)	ENST00000381800	0.838393
hsa-miR-4267	LONP1	ENSG00000196365 (LONP1)	ENST00000590558	0.733807
hsa-miR-4267	LRCH1	ENSG00000136141 (LRCH1)	ENST00000311191	0.711508
hsa-miR-4267	LRRC23	ENSG00000010626 (LRRC23)	ENST00000451681	0.86131
hsa-miR-4267	LRRC46	ENSG00000141294 (LRRC46)	ENST00000584580	0.756393
hsa-miR-4267	LRRC48	ENSG00000171962 (LRRC48)	ENST00000583171	0.904197
hsa-miR-4267	LRRC55	ENSG00000183908 (LRRC55)	ENST00000497933	0.806348
hsa-miR-4267	LRRC59	ENSG00000108829 (LRRC59)	ENST00000225972	0.725027
hsa-miR-4267	LRRC69	ENSG00000214954 (LRRC69)	ENST00000520099	0.840434
hsa-miR-4267	LRRD1	ENSG00000240720 (LRRD1)	ENST00000343318	0.946891
hsa-miR-4267	LRRK1	ENSG00000154237 (LRRK1)	ENST00000525284	0.901696
hsa-miR-4267	LUZP1	ENSG00000169641 (LUZP1)	ENST00000418342	0.812507
hsa-miR-4267	LY9	ENSG00000122224 (LY9)	ENST00000368039	0.840226
hsa-miR-4267	LYPLA2	ENSG00000011009 (LYPLA2)	ENST00000400061	0.907372
hsa-miR-4267	LYRM4	ENSG00000214113 (LYRM4)	ENST00000330636	0.998578
hsa-miR-4267	LZTR1	ENSG00000099949 (LZTR1)	ENST00000415817	0.83426
hsa-miR-4267	LZTS3	ENSG00000088899 (LZTS3)	ENST00000360342	0.769151
hsa-miR-4267	MAF1	ENSG00000179632 (MAF1)	ENST00000534585	0.758621
hsa-miR-4267	MAG	ENSG00000105695 (MAG)	ENST00000361922	0.889199
hsa-miR-4267	MAGED2	ENSG00000102316 (MAGED2)	ENST00000347546	0.878237
hsa-miR-4267	MAGED4B	ENSG00000187243 (MAGED4B)	ENST00000490581	0.916515
hsa-miR-4267	MALT1	ENSG00000172175 (MALT1)	ENST00000348428	0.748488
hsa-miR-4267	MAN2C1	ENSG00000140400 (MAN2C1)	ENST00000566634	0.998789
hsa-miR-4267	MAP3K1	ENSG00000095015 (MAP3K1)	ENST00000399503	0.74702
hsa-miR-4267	MAP3K10	ENSG00000130758 (MAP3K10)	ENST00000597986	0.721569
hsa-miR-4267	MAP3K12	ENSG00000139625 (MAP3K12)	ENST00000552365	0.96399
hsa-miR-4267	MAP3K2	ENSG00000169967 (MAP3K2)	ENST00000409947	0.70674
hsa-miR-4267	MAP3K4	ENSG00000085511 (MAP3K4)	ENST00000490904	0.837261
hsa-miR-4267	MAP3K9	ENSG00000006432 (MAP3K9)	ENST00000554752	0.865357
hsa-miR-4267	MAP4K2	ENSG00000168067 (MAP4K2)	ENST00000435926	0.821339
hsa-miR-4267	MAP4K4	ENSG00000071054 (MAP4K4)	ENST00000413150	0.70073
hsa-miR-4267	MAP4K5	ENSG00000012983 (MAP4K5)	ENST00000013125	0.848156
hsa-miR-4267	MAP7D3	ENSG00000129680 (MAP7D3)	ENST00000370661	0.980158
hsa-miR-4267	MAPK3	ENSG00000102882 (MAPK3)	ENST00000466521	0.994131
hsa-miR-4267	MAPKBP1	ENSG00000137802 (MAPKBP1)	ENST00000505373	0.933129
hsa-miR-4267	MARCKS	ENSG00000155130 (MARCKS)	ENST00000368635	0.704814
hsa-miR-4267	MARK2	ENSG00000072518 (MARK2)	ENST00000377810	0.849805
hsa-miR-4267	MARK4	ENSG00000007047 (MARK4)	ENST00000300843	0.872734
hsa-miR-4267	MARS	ENSG00000166986 (MARS)	ENST00000545888	0.819655
hsa-miR-4267	MAST3	ENSG00000099308 (MAST3)	ENST00000262811	0.817405
hsa-miR-4267	MAT2A	ENSG00000168906 (MAT2A)	ENST00000306434	0.713116
hsa-miR-4267	MB21D2	ENSG00000180611 (MB21D2)	ENST00000392452	0.848822
hsa-miR-4267	MBD1	ENSG00000141644 (MBD1)	ENST00000591416	0.831925
hsa-miR-4267	MBNL1	ENSG00000152601 (MBNL1)	ENST00000357472	0.74596
hsa-miR-4267	MCC	ENSG00000171444 (MCC)	ENST00000302475	0.770238
hsa-miR-4267	MCIDAS	ENSG00000234602 (MCIDAS)	ENST00000513468	0.764072
hsa-miR-4267	MCM8	ENSG00000125885 (MCM8)	ENST00000265187	0.702535
hsa-miR-4267	MCRS1	ENSG00000187778 (MCRS1)	ENST00000548602	0.902343
hsa-miR-4267	MDGA2	ENSG00000139915 (MDGA2)	ENST00000426342	0.736783
hsa-miR-4267	MDM1	ENSG00000111554 (MDM1)	ENST00000393543	0.709626
hsa-miR-4267	MDN1	ENSG00000112159 (MDN1)	ENST00000369393	0.797055
hsa-miR-4267	MECP2	ENSG00000169057 (MECP2)	ENST00000303391	0.855598
hsa-miR-4267	MED13	ENSG00000108510 (MED13)	ENST00000397786	0.80864
hsa-miR-4267	MED22	ENSG00000148297 (MED22)	ENST00000344469	0.733721
hsa-miR-4267	MEF2A	ENSG00000068305 (MEF2A)	ENST00000354410	0.878497
hsa-miR-4267	MEF2BNB-MEF2B	ENSG00000064489 (MEF2BNB-MEF2B)	ENST00000602804	0.742331
hsa-miR-4267	MEF2C	ENSG00000081189 (MEF2C)	ENST00000340208	0.924633
hsa-miR-4267	MEGF9	ENSG00000106780 (MEGF9)	ENST00000373930	0.776203
hsa-miR-4267	MEP1B	ENSG00000141434 (MEP1B)	ENST00000581447	0.824545
hsa-miR-4267	METTL1	ENSG00000037897 (METTL1)	ENST00000257848	0.807312
hsa-miR-4267	METTL21B	ENSG00000123427 (METTL21B)	ENST00000333012	0.727347
hsa-miR-4267	MFF	ENSG00000168958 (MFF)	ENST00000304593	0.788184
hsa-miR-4267	MFN1	ENSG00000171109 (MFN1)	ENST00000471841	0.916266
hsa-miR-4267	MFN2	ENSG00000116688 (MFN2)	ENST00000444836	0.818029
hsa-miR-4267	MFSD2A	ENSG00000168389 (MFSD2A)	ENST00000372809	0.83198
hsa-miR-4267	MICALL2	ENSG00000164877 (MICALL2)	ENST00000413446	0.818386
hsa-miR-4267	MIEF1	ENSG00000100335 (MIEF1)	ENST00000325301	0.725596
hsa-miR-4267	MINK1	ENSG00000141503 (MINK1)	ENST00000574453	0.766311
hsa-miR-4267	MIPOL1	ENSG00000151338 (MIPOL1)	ENST00000555870	0.78212
hsa-miR-4267	MKRN1	ENSG00000133606 (MKRN1)	ENST00000255977	0.703339
hsa-miR-4267	MLLT10	ENSG00000078403 (MLLT10)	ENST00000377072	0.807562
hsa-miR-4267	MMGT1	ENSG00000169446 (MMGT1)	ENST00000305963	0.929696
hsa-miR-4267	MOCS1	ENSG00000124615 (MOCS1)	ENST00000373186	0.875925
hsa-miR-4267	MOGS	ENSG00000115275 (MOGS)	ENST00000409065	0.824451
hsa-miR-4267	MON2	ENSG00000061987 (MON2)	ENST00000547095	0.925042
hsa-miR-4267	MPI	ENSG00000178802 (MPI)	ENST00000566377	0.97124
hsa-miR-4267	MRC2	ENSG00000011028 (MRC2)	ENST00000303375	0.770475
hsa-miR-4267	MRO	ENSG00000134042 (MRO)	ENST00000585524	0.79298
hsa-miR-4267	MROH7-TTC4	ENSG00000271723 (MROH7-TTC4)	ENST00000425300	0.735046
hsa-miR-4267	MRPS17	ENSG00000239789 (MRPS17)	ENST00000285298	0.805745
hsa-miR-4267	MSH5	ENSG00000204410 (MSH5)	ENST00000463144	0.982933
hsa-miR-4267	MSL3	ENSG00000005302 (MSL3)	ENST00000337339	0.914934
hsa-miR-4267	MSTO1	ENSG00000125459 (MSTO1)	ENST00000490743	0.987569
hsa-miR-4267	MTFP1	ENSG00000242114 (MTFP1)	ENST00000266263	0.806304
hsa-miR-4267	MTFR1L	ENSG00000117640 (MTFR1L)	ENST00000474295	0.974033
hsa-miR-4267	MTHFR	ENSG00000177000 (MTHFR)	ENST00000376592	0.709764
hsa-miR-4267	MTR	ENSG00000116984 (MTR)	ENST00000366577	0.746452
hsa-miR-4267	MTX1	ENSG00000173171 (MTX1)	ENST00000424959	0.870359
hsa-miR-4267	MUC19	ENSG00000205592 (MUC19)	ENST00000454784	0.93633
hsa-miR-4267	MUM1	ENSG00000160953 (MUM1)	ENST00000587460	0.731429
hsa-miR-4267	MYH1	ENSG00000109061 (MYH1)	ENST00000226207	0.711666
hsa-miR-4267	MYH10	ENSG00000133026 (MYH10)	ENST00000360416	0.818969
hsa-miR-4267	MYH11	ENSG00000133392 (MYH11)	ENST00000452625	0.980191
hsa-miR-4267	MYH13	ENSG00000006788 (MYH13)	ENST00000418404	0.706165
hsa-miR-4267	MYH14	ENSG00000105357 (MYH14)	ENST00000601313	0.893395
hsa-miR-4267	MYH15	ENSG00000144821 (MYH15)	ENST00000273353	0.812786
hsa-miR-4267	MYH3	ENSG00000109063 (MYH3)	ENST00000226209	0.87148
hsa-miR-4267	MYH6	ENSG00000197616 (MYH6)	ENST00000405093	0.902579
hsa-miR-4267	MYH7	ENSG00000092054 (MYH7)	ENST00000355349	0.883631
hsa-miR-4267	MYH9	ENSG00000100345 (MYH9)	ENST00000216181	0.932487
hsa-miR-4267	MYLK	ENSG00000065534 (MYLK)	ENST00000464489	0.729616
hsa-miR-4267	MYO18A	ENSG00000196535 (MYO18A)	ENST00000530254	0.99969
hsa-miR-4267	MYO18B	ENSG00000133454 (MYO18B)	ENST00000539302	0.998264
hsa-miR-4267	MYO19	ENSG00000141140 (MYO19)	ENST00000586908	0.888618
hsa-miR-4267	MYO1G	ENSG00000136286 (MYO1G)	ENST00000495831	0.858448
hsa-miR-4267	MYRIP	ENSG00000170011 (MYRIP)	ENST00000458441	0.917747
hsa-miR-4267	MYSM1	ENSG00000162601 (MYSM1)	ENST00000472487	0.712249
hsa-miR-4267	N4BP2	ENSG00000078177 (N4BP2)	ENST00000511480	0.971308
hsa-miR-4267	NAA35	ENSG00000135040 (NAA35)	ENST00000376040	0.705572
hsa-miR-4267	NADSYN1	ENSG00000172890 (NADSYN1)	ENST00000525200	0.809117
hsa-miR-4267	NAGK	ENSG00000124357 (NAGK)	ENST00000450272	0.781545
hsa-miR-4267	NAGLU	ENSG00000108784 (NAGLU)	ENST00000591587	0.826366
hsa-miR-4267	NARF	ENSG00000141562 (NARF)	ENST00000309794	0.71856
hsa-miR-4267	NARFL	ENSG00000103245 (NARFL)	ENST00000565425	0.842662
hsa-miR-4267	NASP	ENSG00000132780 (NASP)	ENST00000453748	0.726793
hsa-miR-4267	NAT10	ENSG00000135372 (NAT10)	ENST00000257829	0.717644
hsa-miR-4267	NAV3	ENSG00000067798 (NAV3)	ENST00000266692	0.720735
hsa-miR-4267	NBPF6	ENSG00000186086 (NBPF6)	ENST00000294652	0.838442
hsa-miR-4267	NCALD	ENSG00000104490 (NCALD)	ENST00000395923	0.836732
hsa-miR-4267	NCBP2	ENSG00000114503 (NCBP2)	ENST00000428425	0.926196
hsa-miR-4267	NCKAP1L	ENSG00000123338 (NCKAP1L)	ENST00000548221	0.804442
hsa-miR-4267	NDE1	ENSG00000072864 (NDE1)	ENST00000342673	0.769924
hsa-miR-4267	NDUFB5	ENSG00000136521 (NDUFB5)	ENST00000493866	0.800264
hsa-miR-4267	NECAB3	ENSG00000125967 (NECAB3)	ENST00000488489	0.878026
hsa-miR-4267	NEDD4L	ENSG00000049759 (NEDD4L)	ENST00000256832	0.864014
hsa-miR-4267	NEDD9	ENSG00000111859 (NEDD9)	ENST00000448183	0.928323
hsa-miR-4267	NEK9	ENSG00000119638 (NEK9)	ENST00000238616	0.802141
hsa-miR-4267	NELFA	ENSG00000185049 (NELFA)	ENST00000333877	0.920732
hsa-miR-4267	NEURL1B	ENSG00000214357 (NEURL1B)	ENST00000369800	0.723237
hsa-miR-4267	NFASC	ENSG00000163531 (NFASC)	ENST00000401399	0.747358
hsa-miR-4267	NFAT5	ENSG00000102908 (NFAT5)	ENST00000426654	0.872882
hsa-miR-4267	NFATC2	ENSG00000101096 (NFATC2)	ENST00000371564	0.783946
hsa-miR-4267	NFE2L2	ENSG00000116044 (NFE2L2)	ENST00000423513	0.715651
hsa-miR-4267	NFIA	ENSG00000162599 (NFIA)	ENST00000403491	0.802173
hsa-miR-4267	NGB	ENSG00000165553 (NGB)	ENST00000298352	0.848308
hsa-miR-4267	NGDN	ENSG00000129460 (NGDN)	ENST00000397154	0.979196
hsa-miR-4267	NKIRAS2	ENSG00000168256 (NKIRAS2)	ENST00000307641	0.755907
hsa-miR-4267	NKX2-5	ENSG00000183072 (NKX2-5)	ENST00000424406	0.946144
hsa-miR-4267	NLRC5	ENSG00000140853 (NLRC5)	ENST00000545081	0.993381
hsa-miR-4267	NLRP1	ENSG00000091592 (NLRP1)	ENST00000571451	0.749384
hsa-miR-4267	NOL12	ENSG00000100101 (NOL12)	ENST00000455236	0.956936
hsa-miR-4267	NOL9	ENSG00000162408 (NOL9)	ENST00000377705	0.726906
hsa-miR-4267	NOX5	ENSG00000255346 (NOX5)	ENST00000260364	0.722198
hsa-miR-4267	NPAS4	ENSG00000174576 (NPAS4)	ENST00000525148	0.757851
hsa-miR-4267	NPEPPS	ENSG00000141279 (NPEPPS)	ENST00000530514	0.972664
hsa-miR-4267	NPFFR1	ENSG00000148734 (NPFFR1)	ENST00000277942	0.702339
hsa-miR-4267	NPHP4	ENSG00000131697 (NPHP4)	ENST00000378169	0.833705
hsa-miR-4267	NPLOC4	ENSG00000182446 (NPLOC4)	ENST00000374747	0.815592
hsa-miR-4267	NPR3	ENSG00000113389 (NPR3)	ENST00000265074	0.767844
hsa-miR-4267	NPRL2	ENSG00000114388 (NPRL2)	ENST00000451194	0.999102
hsa-miR-4267	NQO1	ENSG00000181019 (NQO1)	ENST00000379047	0.750032
hsa-miR-4267	NR1D1	ENSG00000126368 (NR1D1)	ENST00000246672	0.75478
hsa-miR-4267	NR3C2	ENSG00000151623 (NR3C2)	ENST00000344721	0.845544
hsa-miR-4267	NRDE2	ENSG00000119720 (NRDE2)	ENST00000553409	0.88578
hsa-miR-4267	NRG1	ENSG00000157168 (NRG1)	ENST00000341377	0.753381
hsa-miR-4267	NSUN4	ENSG00000117481 (NSUN4)	ENST00000307089	0.746911
hsa-miR-4267	NTN1	ENSG00000065320 (NTN1)	ENST00000546090	0.715671
hsa-miR-4267	NUAK1	ENSG00000074590 (NUAK1)	ENST00000261402	0.740751
hsa-miR-4267	NUBP2	ENSG00000095906 (NUBP2)	ENST00000568834	0.789116
hsa-miR-4267	NUMA1	ENSG00000137497 (NUMA1)	ENST00000545721	0.845522
hsa-miR-4267	NUP155	ENSG00000113569 (NUP155)	ENST00000231498	0.765389
hsa-miR-4267	NUP85	ENSG00000125450 (NUP85)	ENST00000581104	0.856435
hsa-miR-4267	NUPR1	ENSG00000176046 (NUPR1)	ENST00000567646	0.874845
hsa-miR-4267	NUTM2G	ENSG00000188152 (NUTM2G)	ENST00000354649	0.823225
hsa-miR-4267	NWD1	ENSG00000188039 (NWD1)	ENST00000518676	0.892548
hsa-miR-4267	NXF1	ENSG00000162231 (NXF1)	ENST00000531709	0.95035
hsa-miR-4267	NXPE3	ENSG00000144815 (NXPE3)	ENST00000422132	0.931576
hsa-miR-4267	OASL	ENSG00000135114 (OASL)	ENST00000339275	0.881964
hsa-miR-4267	OBSL1	ENSG00000124006 (OBSL1)	ENST00000265318	0.951903
hsa-miR-4267	OGFOD2	ENSG00000111325 (OGFOD2)	ENST00000540324	0.995584
hsa-miR-4267	OLA1	ENSG00000138430 (OLA1)	ENST00000284719	0.832397
hsa-miR-4267	OLFM3	ENSG00000118733 (OLFM3)	ENST00000536598	0.827232
hsa-miR-4267	OLFML2A	ENSG00000185585 (OLFML2A)	ENST00000288815	0.718662
hsa-miR-4267	ONECUT2	ENSG00000119547 (ONECUT2)	ENST00000491143	0.786325
hsa-miR-4267	OPHN1	ENSG00000079482 (OPHN1)	ENST00000355520	0.823131
hsa-miR-4267	ORAI2	ENSG00000160991 (ORAI2)	ENST00000356387	0.777547
hsa-miR-4267	OSBPL7	ENSG00000006025 (OSBPL7)	ENST00000579728	0.891196
hsa-miR-4267	OSCAR	ENSG00000170909 (OSCAR)	ENST00000391761	0.732794
hsa-miR-4267	OSMR	ENSG00000145623 (OSMR)	ENST00000274276	0.724075
hsa-miR-4267	OSTM1	ENSG00000081087 (OSTM1)	ENST00000193322	0.729316
hsa-miR-4267	OTOP3	ENSG00000182938 (OTOP3)	ENST00000580749	0.736982
hsa-miR-4267	OTX2	ENSG00000165588 (OTX2)	ENST00000339475	0.77881
hsa-miR-4267	OXNAD1	ENSG00000154814 (OXNAD1)	ENST00000285083	0.883875
hsa-miR-4267	OXSR1	ENSG00000172939 (OXSR1)	ENST00000311806	0.726678
hsa-miR-4267	P2RX4	ENSG00000135124 (P2RX4)	ENST00000543984	0.784745
hsa-miR-4267	P2RX6	ENSG00000099957 (P2RX6)	ENST00000442475	0.73909
hsa-miR-4267	P2RY6	ENSG00000171631 (P2RY6)	ENST00000393590	0.779278
hsa-miR-4267	PA2G4	ENSG00000170515 (PA2G4)	ENST00000303305	0.964367
hsa-miR-4267	PACRG	ENSG00000112530 (PACRG)	ENST00000541974	0.943992
hsa-miR-4267	PACSIN1	ENSG00000124507 (PACSIN1)	ENST00000374043	0.721978
hsa-miR-4267	PAPOLB	ENSG00000218823 (PAPOLB)	ENST00000404991	0.745263
hsa-miR-4267	PARD3B	ENSG00000116117 (PARD3B)	ENST00000406610	0.732646
hsa-miR-4267	PARP3	ENSG00000041880 (PARP3)	ENST00000471971	0.969955
hsa-miR-4267	PARP8	ENSG00000151883 (PARP8)	ENST00000503750	0.947738
hsa-miR-4267	PARP9	ENSG00000138496 (PARP9)	ENST00000462315	0.722713
hsa-miR-4267	PBX4	ENSG00000105717 (PBX4)	ENST00000557978	0.717676
hsa-miR-4267	PCDH12	ENSG00000113555 (PCDH12)	ENST00000231484	0.818178
hsa-miR-4267	PCDH20	ENSG00000197991 (PCDH20)	ENST00000409204	0.938942
hsa-miR-4267	PCNT	ENSG00000160299 (PCNT)	ENST00000359568	0.764642
hsa-miR-4267	PCSK5	ENSG00000099139 (PCSK5)	ENST00000545128	0.704936
hsa-miR-4267	PDF	ENSG00000258429 (PDF)	ENST00000288022	0.756509
hsa-miR-4267	PDGFRA	ENSG00000134853 (PDGFRA)	ENST00000257290	0.706194
hsa-miR-4267	PDGFRB	ENSG00000113721 (PDGFRB)	ENST00000520579	0.860766
hsa-miR-4267	PDPN	ENSG00000162493 (PDPN)	ENST00000376057	0.910864
hsa-miR-4267	PDZD2	ENSG00000133401 (PDZD2)	ENST00000438447	0.719987
hsa-miR-4267	PDZD9	ENSG00000155714 (PDZD9)	ENST00000523914	0.80893
hsa-miR-4267	PELP1	ENSG00000141456 (PELP1)	ENST00000575329	0.820357
hsa-miR-4267	PEX26	ENSG00000215193 (PEX26)	ENST00000329627	0.991497
hsa-miR-4267	PFKL	ENSG00000141959 (PFKL)	ENST00000397961	0.883054
hsa-miR-4267	PFKM	ENSG00000152556 (PFKM)	ENST00000547581	0.713416
hsa-miR-4267	PGAP1	ENSG00000197121 (PGAP1)	ENST00000423035	0.754291
hsa-miR-4267	PGAP2	ENSG00000148985 (PGAP2)	ENST00000528216	0.847283
hsa-miR-4267	PGAP3	ENSG00000161395 (PGAP3)	ENST00000579146	0.747197
hsa-miR-4267	PGM5	ENSG00000154330 (PGM5)	ENST00000396396	0.753778
hsa-miR-4267	PHF13	ENSG00000116273 (PHF13)	ENST00000377648	0.767121
hsa-miR-4267	PHF20L1	ENSG00000129292 (PHF20L1)	ENST00000460236	0.745998
hsa-miR-4267	PHF8	ENSG00000172943 (PHF8)	ENST00000357988	0.784787
hsa-miR-4267	PHIP	ENSG00000146247 (PHIP)	ENST00000275034	0.727193
hsa-miR-4267	PHYHIP	ENSG00000168490 (PHYHIP)	ENST00000321613	0.873314
hsa-miR-4267	PIEZO1	ENSG00000103335 (PIEZO1)	ENST00000419505	0.959294
hsa-miR-4267	PIGL	ENSG00000108474 (PIGL)	ENST00000585034	0.807313
hsa-miR-4267	PIGN	ENSG00000197563 (PIGN)	ENST00000357637	0.818789
hsa-miR-4267	PIGZ	ENSG00000119227 (PIGZ)	ENST00000413127	0.790201
hsa-miR-4267	PIK3C2B	ENSG00000133056 (PIK3C2B)	ENST00000367187	0.714407
hsa-miR-4267	PIK3CB	ENSG00000051382 (PIK3CB)	ENST00000462898	0.798845
hsa-miR-4267	PIK3CD	ENSG00000171608 (PIK3CD)	ENST00000536656	0.742852
hsa-miR-4267	PIK3R5	ENSG00000141506 (PIK3R5)	ENST00000269300	0.941225
hsa-miR-4267	PIP4K2B	ENSG00000141720 (PIP4K2B)	ENST00000269554	0.784662
[truncated: 1,893 more rows]

## Sheet: miRNAs
This table shows the inputting miRNAs and the number of their predicted target genes.
MicroRNA Name	Number of target genes
hsa-miR-4267	1537
hsa-miR-5096	1151
hsa-miR-1246	861
hsa-miR-7641	170
hsa-miR-3197	108
hsa-miR-151b	42
hsa-miR-1307-3p	22

## Sheet: Target genes
This table shows the predicted target genes and the number of miRNAs targeting them.
Gene symbol	Number of related miRNAs
DNAH3	4
GOLGB1	4
ASCC3	3
C22orf42	3
CBX5	3
CEP89	3
DDI2	3
DNAJC10	3
FGFR1OP	3
FOXP2	3
FUT9	3
GRIN2B	3
MALT1	3
NFAT5	3
NTRK2	3
RRAGD	3
SLC8A1	3
SPATA32	3
TAOK1	3
TSHZ2	3
TTL	3
UGGT1	3
UTRN	3
VKORC1L1	3
ZNF773	3
ZSCAN30	3
FLII	3
DCAF7	3
ACO1	2
ADAMTS6	2
AGO1	2
AKNAD1	2
AMMECR1	2
ANGPTL1	2
ANK1	2
ANK2	2
ANKFY1	2
AP3B1	2
AR	2
ARHGAP26	2
ATF6	2
ATP2B1	2
ATP8B4	2
ATRX	2
BEND4	2
BRPF1	2
BRWD1	2
C19orf82	2
C22orf39	2
CASP14	2
CCDC178	2
CCDC6	2
CCDC84	2
CCNY	2
CD22	2
CD44	2
CDH8	2
CFLAR	2
CHIC1	2
CLLU1	2
COPS2	2
CREB5	2
CSRNP3	2
CTNNA3	2
DAB1	2
DCX	2
DGKI	2
DKC1	2
DMRT2	2
DTNBP1	2
DYNC1I1	2
EIF3F	2
ENDOV	2
ENTPD1	2
ERBB4	2
EXPH5	2
FAM126B	2
FAM168A	2
FAM53C	2
FAXC	2
FBXO10	2
FBXO3	2
FCRL3	2
FER	2
FIGN	2
GABRB3	2
GCFC2	2
GMCL1	2
GMFB	2
GMNC	2
GNAQ	2
GPATCH2L	2
GPR12	2
HECW1	2
HHIP	2
HIPK2	2
HSPA4L	2
IFT74	2
IGJ	2
KAT2B	2
KCNJ15	2
KCTD16	2
KDM5A	2
KIAA0355	2
KIAA1377	2
KIF26B	2
KIRREL	2
KLHL1	2
KLHL15	2
KLHL42	2
KMT2C	2
KRR1	2
LDB2	2
LIN54	2
LIN7A	2
LMAN2L	2
LRIT2	2
LRRTM2	2
MAGI2	2
MAN1A2	2
MAP3K1	2
MEF2C	2
MGAT4A	2
MMP8	2
MOB3B	2
MRPS18C	2
MTMR9	2
MTPAP	2
NCAM1	2
NCAM2	2
NCKAP1	2
NFIA	2
NHLH2	2
NPFFR1	2
NRIP1	2
NUTM2D	2
ONECUT2	2
PA2G4	2
PAPOLG	2
PARD3B	2
PARP14	2
PCBP2	2
PDE4DIP	2
PGAP1	2
PGM5	2
PGR	2
PIK3CB	2
PLAGL2	2
PLCXD3	2
PLEKHA7	2
PPIP5K2	2
PPM1L	2
PPP1CB	2
PPP1R9B	2
PPP2R3C	2
PRLR	2
PRRG1	2
PSD3	2
PTCH1	2
PTEN	2
PYGO1	2
RAB30	2
RAPGEF2	2
RC3H2	2
RCAN3	2
RCBTB1	2
REV3L	2
RGS5	2
RNF168	2
RORA	2
RP11-664D7.4	2
RRN3	2
RSF1	2
SCAI	2
SEMA3A	2
SEMA6A	2
SH3BP2	2
SHOX	2
SKIL	2
SLC26A3	2
SLC28A3	2
SLC38A2	2
SLC39A10	2
SLFN5	2
SLITRK4	2
SMG7	2
SOCS4	2
SOS1	2
SPTY2D1	2
SRPK2	2
STC1	2
SYTL2	2
TBCA	2
TM9SF3	2
TMEM123	2
TMEM182	2
TMEM194A	2
TNRC6A	2
TXNL1	2
UBE2D2	2
UBE2D3	2
UBE2G1	2
UBN2	2
USP6NL	2
VPS53	2
VTA1	2
VWA3B	2
WDR77	2
WT1	2
XIAP	2
XKR4	2
YTHDF3	2
ZBTB1	2
ZBTB37	2
ZCCHC6	2
ZFP36L1	2
ZNF420	2
ZNF518B	2
ZNF675	2
ZNF704	2
ZNF720	2
EHMT1	2
NADSYN1	2
C2	2
CTD-2162K18.4	2
KIAA1429	2
MAP3K4	2
MTRR	2
NDE1	2
RNF165	2
ZNF208	2
ADCYAP1R1	2
CDH16	2
CEACAM18	2
CTNNBIP1	2
ESPL1	2
FTO	2
GLG1	2
HAUS5	2
IGFBP5	2
INO80	2
KDM6B	2
KLF12	2
KRBA1	2
LA16c-431H6.6	2
NCR3LG1	2
NECAB3	2
NOL12	2
NUPR1	2
PEX26	2
PKD1	2
RARS	2
RP11-51F16.8	2
SEC22C	2
SERF1A	2
SMARCD3	2
TOR2A	2
TRIOBP	2
SEPT6	2
AAK1	2
AASS	2
ABCB11	2
ABI2	2
AC002472.13	2
AC135983.2	2
ACE	2
ADGB	2
AIFM1	2
AQR	2
ARHGEF40	2
ATRIP	2
AVIL	2
BMPR2	2
BRCA1	2
BRD8	2
C5orf24	2
C7orf31	2
CCDC65	2
CHD8	2
CLVS2	2
CNBD2	2
CNKSR3	2
CNNM2	2
COL22A1	2
COL24A1	2
CORO1C	2
CORO2A	2
CPEB3	2
DDX56	2
DIEXF	2
DKK2	2
DRAXIN	2
DST	2
EIF4E3	2
FAM83F	2
FBXW11	2
FBXW8	2
GATA4	2
GBP3	2
GCC2	2
GLS	2
GOLGA4	2
GSX2	2
GUCY1A3	2
HABP4	2
HEMK1	2
HIP1	2
HUNK	2
IQCC	2
IRF2	2
KCNH8	2
KCNK10	2
KIAA0247	2
KIAA0753	2
KIAA0907	2
KIAA1257	2
KIDINS220	2
KIF15	2
LEMD3	2
LGR4	2
LHX4	2
LRRC23	2
LRRC48	2
LY9	2
MBNL1	2
MIPOL1	2
MON2	2
MROH7-TTC4	2
MYH10	2
N4BP2	2
NAV3	2
NEDD4L	2
NRG1	2
ORAI2	2
PHF20L1	2
PITPNM3	2
PLCG2	2
POU2F1	2
PPFIA1	2
PPFIA2	2
PTPN9	2
RAB3IP	2
RIF1	2
RPGRIP1	2
SAMD12	2
SARNP	2
SEC24C	2
SH3RF1	2
SIK2	2
SLIT3	2
SOX11	2
SPAG17	2
SUGT1	2
SYNCRIP	2
TAF4B	2
TANGO6	2
TATDN3	2
TCP11X2	2
TIFAB	2
TMEM183A	2
TMOD1	2
TP53BP1	2
TRIO	2
TSPAN14	2
TTPAL	2
UHRF2	2
USP46	2
VLDLR	2
VPS13B	2
WNK3	2
XRRA1	2
XYLB	2
YIPF4	2
ZNF18	2
ZNF280B	2
ZZEF1	2
ADAM10	2
AGTPBP1	2
ATL3	2
DGKH	2
GSTO2	2
HSPA5	2
LGALS8	2
MBTD1	2
METTL10	2
PAFAH2	2
PPM1K	2
PSMA1	2
SLC36A4	2
STAMBPL1	2
TMEM239	2
TUBA1C	2
VWC2	2
XPO1	2
ZFP90	2
ZNF614	2
MARCH3	1
MARCH6	1
SEPT7	1
SEP15	1
ABCC3	1
AC008394.1	1
AC010547.9	1
AC145676.2	1
ACVR1	1
ACVR2A	1
ADAM22	1
ADAM28	1
ADAMTS10	1
ADAMTS18	1
ADAMTS8	1
AGL	1
AHSA2	1
AKAP2	1
AL590452.1	1
ALDH5A1	1
ALDH6A1	1
ALDH7A1	1
AMPD3	1
ANGEL2	1
ANGPT2	1
ANKDD1B	1
ANKRD34C	1
ANKRD66	1
ANTXR1	1
ANTXR2	1
APLF	1
APTX	1
AQP1	1
ARFIP1	1
ARHGAP15	1
ARL4C	1
ARL5A	1
ARSJ	1
ASTN1	1
ASXL2	1
ASZ1	1
ATF1	1
ATP1A4	1
ATP1B1	1
ATP2B2	1
ATP2B4	1
ATP6V1G3	1
ATP9B	1
ATRN	1
AUTS2	1
AXIN2	1
B3GALNT1	1
B3GAT2	1
BACH1	1
BAHD1	1
BAZ2B	1
BCL2L14	1
BCL2L2	1
BCL9	1
BEGAIN	1
BEND7	1
BHLHB9	1
BMP7	1
BNC2	1
BRCC3	1
BRI3BP	1
C10orf90	1
C11orf30	1
C11orf44	1
C11orf45	1
C12orf71	1
C14orf64	1
C15orf53	1
C17orf102	1
C17orf80	1
C1orf141	1
C1orf21	1
C20orf26	1
C2orf73	1
C3orf36	1
C4orf32	1
C4orf40	1
C4orf50	1
C5orf28	1
C5orf64	1
C9	1
CA10	1
CADM1	1
CADM2	1
CAND1	1
CAPN8	1
CAPZA1	1
CCDC176	1
CCDC50	1
CCDC88A	1
CCER1	1
CCNG2	1
CCNT2	1
CCSER2	1
CD109	1
CD74	1
CDC42EP3	1
CDC73	1
CDH2	1
CDK12	1
CDRT4	1
CEP104	1
CFTR	1
CGRRF1	1
CHAMP1	1
CHKA	1
CHMP3	1
CHST9	1
CISD1	1
CLCC1	1
CLEC4C	1
CLINT1	1
CLVS1	1
CMTM6	1
CNOT6L	1
CNTN5	1
CNTN6	1
COBLL1	1
COG6	1
COLCA1	1
COPRS	1
CPT2	1
CR769776.1	1
CRB1	1
CREBL2	1
CREG2	1
CT62	1
CTSC	1
CTXN3	1
CUL2	1
CWC27	1
CXorf27	1
CXXC4	1
CYSTM1	1
DCAF17	1
DCAF6	1
DDI1	1
DENND2C	1
DENND2D	1
DHX33	1
DHX36	1
DIO2	1
DKFZP667F0711	1
DLD	1
DLG1	1
DLG2	1
DLG3	1
DNAH8	1
DNAH9	1
DNAJB14	1
DOK3	1
DSCC1	1
DTL	1
DTNA	1
DUSP18	1
DYRK1A	1
DYRK2	1
E2F8	1
EDA	1
EFCAB14	1
EFHC2	1
EHF	1
EIF2AK3	1
EIF4E	1
EIF4EBP2	1
EIF5B	1
ELMOD2	1
ENOX2	1
ENSA	1
EPHA4	1
EPM2AIP1	1
ERO1LB	1
ESM1	1
EXOSC10	1
EXOSC9	1
F8A1	1
F8A2	1
F8A3	1
FAM122B	1
FAM131B	1
FAM13B	1
FAM151B	1
FAM153A	1
FAM169B	1
FAM180A	1
FAM184A	1
FAM19A5	1
FAM71C	1
FAM71D	1
FAM76B	1
FAM98A	1
FBXO28	1
FBXO42	1
FEM1B	1
FGF13	1
FGF14	1
FGF5	1
FGGY	1
FIGF	1
FKBP1C	1
FLI1	1
FMN1	1
FNDC3A	1
FNIP2	1
FOPNL	1
FRK	1
FRMD3	1
FSTL5	1
FUT8	1
FXR1	1
FYB	1
FZD3	1
FZD8	1
GALNT11	1
GALNT15	1
GANC	1
GAS1	1
GDAP1	1
GIGYF2	1
GIMAP8	1
GIN1	1
GINS3	1
GLIPR1L1	1
GLRB	1
GLTSCR1L	1
GNRHR	1
GOLGA1	1
GOLGA6L4	1
GPALPP1	1
GPATCH11	1
GPC4	1
GPC5	1
GPR139	1
GPR161	1
GPR26	1
GPR85	1
GRHL1	1
GRIA1	1
GRM1	1
GSG1L	1
GSK3B	1
GTF2H5	1
GTF2I	1
GYS2	1
H3F3A	1
HAUS6	1
HCCS	1
HEBP2	1
HECTD2	1
HELZ	1
HIPK1	1
HLF	1
HOPX	1
HOXD13	1
HS3ST1	1
INO80C	1
INPP4B	1
INTU	1
IP6K1	1
IRAK2	1
IRS1	1
ISCA1	1
ITGA1	1
ITGAV	1
ITSN2	1
IYD	1
JAKMIP2	1
JAM2	1
JARID2	1
KALRN	1
KCNAB1	1
KCNC1	1
KCNQ3	1
KCNS3	1
KIAA0196	1
KIAA0895	1
KIAA1244	1
KIAA1456	1
KIAA1715	1
KIF11	1
KLC1	1
KLHL14	1
KMT2D	1
KPNA4	1
KPNA5	1
KRTAP19-1	1
KSR2	1
LACE1	1
LAMP2	1
LATS2	1
LAX1	1
LCOR	1
LHFPL3	1
LILRA4	1
LIN9	1
LNPEP	1
LPIN2	1
LRCH3	1
LRFN5	1
LRMP	1
LSS	1
LUZP2	1
LY75	1
MAGEA12	1
MAGEA2	1
MAGEA2B	1
MAGEA6	1
MAN1A1	1
MAP1B	1
MAP3K7CL	1
MAPK1	1
MAX	1
MBD5	1
MBNL2	1
MBNL3	1
MC2R	1
MCCC1	1
MCCC2	1
MCTP1	1
MEGF10	1
MEIS1	1
MEIS3	1
METAP2	1
MGA	1
MGME1	1
MIA3	1
MINA	1
MITF	1
MKKS	1
MLLT3	1
MLTK	1
MMP16	1
MPZ	1
MRI1	1
MSANTD1	1
MSN	1
MSR1	1
MTERF	1
MUT	1
MYOF	1
NAA30	1
NACC2	1
NAMPT	1
NAPEPLD	1
NCAPG2	1
NCOA7	1
NDFIP1	1
NECAB1	1
NEK7	1
NFE2L3	1
NFIB	1
NHLRC2	1
NIPAL3	1
NIPBL	1
NLRP3	1
NMRK1	1
NOVA1	1
NPAT	1
NRK	1
NRXN1	1
NT5E	1
NUDT4	1
NUP153	1
NUP160	1
NUP50	1
OCRL	1
OGN	1
ORC4	1
OSBPL6	1
PABPC4L	1
PADI4	1
PAIP2B	1
PALM2-AKAP2	1
PAQR3	1
PAQR5	1
PAWR	1
PAX8	1
PCDH19	1
PCDHA5	1
PDE11A	1
PEAK1	1
PEG3	1
PHC3	1
PHLDA1	1
PHLDB2	1
PHYHIPL	1
PIK3AP1	1
PIK3C2A	1
PIK3CA	1
PIP5K1B	1
PITPNM1	1
PKN2	1
PLAG1	1
PLCB4	1
PLCL2	1
PLEKHA3	1
PLEKHG2	1
PLEKHO2	1
PLGLB1	1
PLGLB2	1
PMP2	1
PMS1	1
POLA2	1
POU2AF1	1
PPHLN1	1
PPP1R11	1
PPP2CB	1
PPP2R2B	1
PPP2R3A	1
PPTC7	1
PRELP	1
PREX2	1
PRICKLE2	1
PRKAA2	1
PRKACA	1
PRKACB	1
PRSS37	1
PSG3	1
PSIP1	1
PSMA5	1
PSMD12	1
PTAR1	1
PTGR1	1
PTPLAD2	1
PTPN4	1
PTPRD	1
PURB	1
PXN	1
QTRTD1	1
RAB14	1
RAB18	1
RAD1	1
RAD51L3-RFFL	1
RAD9B	1
RAP2C	1
RASA1	1
RASA2	1
RAVER2	1
RBBP9	1
RBL1	1
RBM26	1
RDX	1
REL	1
REPS2	1
RERE	1
REXO1L1P	1
RGS17	1
RGS7BP	1
RGS8	1
RIMBP2	1
RNF11	1
RNF141	1
RNF150	1
RNF182	1
RNF4	1
RP11-146D12.2	1
RP11-637O19.3	1
RP11-73M18.2	1
RPGRIP1L	1
RSBN1	1
RSPH3	1
RTKN2	1
RUFY4	1
RYBP	1
RYR2	1
SCN3A	1
SDAD1	1
SEC14L5	1
SEC63	1
SEMA6D	1
SENP1	1
SEPHS1	1
SERAC1	1
SERPIND1	1
SETDB2	1
SFT2D2	1
SGPP1	1
SH2B3	1
SH3RF2	1
SHC4	1
SHISA9	1
SIAE	1
SIAH3	1
SIKE1	1
SLAIN1	1
SLC12A2	1
SLC16A7	1
SLC17A6	1
SLC17A8	1
SLC25A53	1
SLC28A2	1
SLC35F1	1
SLC35G1	1
SLC37A3	1
SLC39A9	1
SLC41A2	1
SMAD4	1
SMCO1	1
SNAPC5	1
SOAT1	1
SORL1	1
SOX2	1
SPA17	1
SPAM1	1
SPATA17	1
SPATS1	1
SPATS2L	1
SPOCK2	1
SPTBN1	1
SS18L2	1
ST8SIA6	1
STARD5	1
STOX2	1
STYX	1
SVEP1	1
SYCP2L	1
SYT14	1
TAF9B	1
TBC1D23	1
TBC1D31	1
TBR1	1
TC2N	1
TCN1	1
TCP11	1
TEAD1	1
TET1	1
TET2	1
TGFA	1
THADA	1
THSD7A	1
TM2D3	1
TM4SF18	1
TM9SF2	1
TMEM130	1
TMEM132B	1
TMEM132C	1
TMEM132D	1
TMEM184A	1
TMEM189-UBE2V1	1
TMEM242	1
TMEM260	1
TMEM261	1
TMEM33	1
TMEM55A	1
TMTC3	1
TNFRSF10A	1
TNFRSF11A	1
TNFSF18	1
TNKS2	1
TRIP12	1
TROVE2	1
TRPS1	1
TSPAN16	1
TSPYL1	1
TSPYL4	1
TSTD2	1
TTC5	1
TUSC3	1
TWSG1	1
TXNDC8	1
UBASH3B	1
UBE2A	1
UBE2H	1
UBE2V1	1
UBE2Z	1
UBXN10	1
UFL1	1
UGT1A8	1
UHMK1	1
UNC5B	1
USO1	1
USP34	1
USP48	1
USP49	1
USP7	1
VIM	1
VPS35	1
VPS45	1
VSIG10	1
WAC	1
WASF3	1
WDR3	1
WDR78	1
WNT2B	1
XK	1
XPNPEP3	1
YIPF6	1
ZBTB21	1
ZBTB39	1
ZC3H12B	1
ZC3H12C	1
ZFP42	1
ZFP69B	1
ZFY	1
ZIC2	1
ZKSCAN2	1
ZKSCAN3	1
ZKSCAN7	1
ZKSCAN8	1
ZNF10	1
ZNF101	1
ZNF112	1
ZNF124	1
ZNF143	1
ZNF148	1
ZNF155	1
ZNF17	1
ZNF226	1
ZNF227	1
ZNF23	1
ZNF254	1
ZNF267	1
ZNF304	1
ZNF430	1
ZNF462	1
ZNF470	1
ZNF502	1
ZNF507	1
ZNF525	1
ZNF528	1
ZNF583	1
ZNF625	1
ZNF627	1
ZNF677	1
ZNF680	1
ZNF697	1
ZNF770	1
ZNF800	1
ZNF816	1
ZNF83	1
ZNF845	1
ZNF85	1
ZNF860	1
ZNF91	1
ZSCAN31	1
ZXDB	1
ZYG11B	1
C3orf70	1
CTC-429P9.4	1
CYGB	1
EML2	1
EMP3	1
FAM229A	1
IQCB1	1
MOV10L1	1
NDRG2	1
PATL2	1
PRR24	1
RPS11	1
SLC22A1	1
STARD9	1
TBC1D10C	1
TFPT	1
TMEM161A	1
WBSCR16	1
AC013269.5	1
APH1A	1
B3GALT5	1
C15orf37	1
DNMBP	1
EFNB2	1
FANCA	1
GALP	1
GLT1D1	1
GNLY	1
GPR173	1
HELT	1
HOXB4	1
JMJD8	1
MEST	1
MRPL43	1
PATZ1	1
PQLC1	1
PRODH	1
RALGAPA1	1
RARG	1
SEZ6L	1
SH2D4B	1
SIGLEC12	1
SLC25A24	1
SOX17	1
SRSF7	1
TDRD3	1
TUBG1	1
UTY	1
XPR1	1
ZNF532	1
AC010536.1	1
AL133373.1	1
ALG3	1
APOBEC3C	1
ASCC2	1
ATP5SL	1
BMP8B	1
C19orf35	1
C19orf55	1
C19orf84	1
CASK	1
CHST3	1
CLASP1	1
CLCN3	1
CTSH	1
DAND5	1
DBP	1
EXOC3	1
FAM129B	1
FAM168B	1
FBRS	1
FCGR2A	1
GOLGA6L6	1
GPX2	1
GRAMD1A	1
GRM4	1
GSX1	1
HEBP1	1
HECTD4	1
HOXB6	1
HOXC6	1
ISOC1	1
MCF2L2	1
METTL22	1
MORN4	1
MRPS12	1
NAA60	1
NCOA1	1
NCOR2	1
NDEL1	1
NDUFV3	1
NKX3-2	1
NTS	1
NUP98	1
NUTM2E	1
PAEP	1
PDRG1	1
PELI2	1
PIP5K1C	1
PPP1R3D	1
PRRG3	1
PRRT1	1
RABEP2	1
RP11-552F3.12	1
SCARF1	1
SCUBE1	1
SCYL3	1
SIRPB1	1
SLC29A1	1
SP140L	1
SPIRE2	1
SRCIN1	1
STON2	1
SZT2	1
TAPBP	1
TOM1L2	1
TRPM4	1
TWF2	1
USP40	1
VPS33B	1
ZNF44	1
ZNF595	1
ZNF788	1
ZNF850	1
ZNF880	1
ZNRF1	1
MARCH9	1
AATF	1
ABCA10	1
ABCA2	1
ABCA5	1
ABCA9	1
ABCB8	1
ABCC11	1
ABCC12	1
ABCC8	1
ABCD4	1
ABCF1	1
ABCF2	1
ABHD15	1
ABHD16A	1
ABI3	1
ABL2	1
ABTB2	1
AC002985.3	1
AC004381.6	1
AC006372.1	1
AC006946.15	1
AC010336.1	1
AC011755.1	1
AC012123.1	1
AC024592.12	1
AC092850.1	1
AC110619.2	1
AC174470.1	1
ACADM	1
ACADVL	1
ACAP2	1
ACSL5	1
ACTN2	1
ACTR3C	1
ADAM11	1
ADAM23	1
ADAMTS15	1
ADAMTS4	1
ADAMTSL1	1
ADCK5	1
ADCY6	1
ADNP	1
ADORA1	1
ADPGK	1
ADPRH	1
AFF1	1
AFF2	1
AGBL5	1
AGFG2	1
AGT	1
AIPL1	1
AKR1C1	1
AL356356.1	1
AL359091.2	1
ALDH16A1	1
ALDH1A2	1
ALDH1L1	1
ALG1	1
ALG5	1
ALOX15	1
ALPK3	1
AMDHD2	1
AMOT	1
AMZ1	1
ANKRD11	1
ANKRD23	1
ANKRD39	1
ANKRD42	1
ANO8	1
ANXA11	1
AOC3	1
AP000974.1	1
AP1S3	1
AP2A1	1
APOBEC2	1
APOC3	1
APOLD1	1
ARFGAP1	1
ARHGAP19-SLIT1	1
ARHGAP6	1
ARHGEF3	1
ARID4B	1
ARL10	1
ARL3	1
ARL6IP1	1
ARMC5	1
ARSB	1
ASAP3	1
ASB12	1
ASH1L	1
ASIC1	1
ASPSCR1	1
ATCAY	1
ATG13	1
ATG16L1	1
ATP13A4	1
ATP1B2	1
ATP2A3	1
ATP5A1	1
ATP6V1D	1
ATP8A1	1
ATP8B2	1
ATXN2	1
ATXN2L	1
ATXN7	1
ATXN7L1	1
ATXN7L2	1
B4GALT3	1
BAI1	1
BAIAP2	1
BAMBI	1
BCAR1	1
BCKDHB	1
BET1L	1
BHLHE40	1
BICD2	1
BLOC1S1	1
BMP1	1
BPIFB6	1
BRD2	1
BRPF3	1
BSDC1	1
BTBD10	1
BTG1	1
C10orf126	1
C10orf2	1
C10ORF68	1
C10orf76	1
C11orf49	1
C11orf72	1
C14orf166B	1
C14orf39	1
C15orf27	1
C15orf52	1
C17orf67	1
C19orf47	1
C1orf106	1
C1orf158	1
C1orf27	1
C1orf61	1
C1orf95	1
C1QTNF1	1
C1QTNF7	1
C20orf194	1
C20orf96	1
C2orf68	1
C3orf49	1
C5AR2	1
C5orf15	1
C5orf20	1
C5orf42	1
C5orf49	1
C7orf55-LUC7L2	1
C9orf114	1
C9orf47	1
CACNA1G	1
CACNA1S	1
CALHM1	1
CAMK2A	1
CAMSAP1	1
CAMTA2	1
CAPN6	1
CARD14	1
CARHSP1	1
CARS	1
CATSPERG	1
CBLN3	1
CBR1	1
CBWD2	1
CC2D1A	1
CC2D2B	1
CCBL2	1
CCDC107	1
CCDC115	1
CCDC149	1
CCDC151	1
CCDC152	1
CCDC180	1
CCDC183	1
CCDC27	1
CCDC61	1
CCDC64	1
CCDC69	1
CCDC88B	1
CCDC97	1
CCNDBP1	1
CD2BP2	1
CD37	1
CDAN1	1
CDC37	1
CDCA5	1
CDH23	1
CDHR1	1
CDK5RAP2	1
CDK5RAP3	1
CDKL4	1
CDX1	1
CECR2	1
CELF5	1
CENPF	1
CEP152	1
CEP44	1
CEP72	1
CEP76	1
CEP85	1
CEP85L	1
CERS2	1
CERS5	1
CHAC1	1
CHCHD6	1
CHD4	1
CHD6	1
CHID1	1
CHMP1B	1
CHMP4A	1
CHMP7	1
CHP2	1
CHRD	1
CHRDL1	1
CHRM2	1
CHRNB2	1
CHTOP	1
CIITA	1
CIPC	1
CIRBP	1
CISH	1
CKB	1
CLDN18	1
CLEC17A	1
CLMN	1
CLSTN2	1
CLTA	1
CLTB	1
CLTCL1	1
CMTM7	1
CNBP	1
CNOT7	1
CNR1	1
CNTN2	1
CNTROB	1
COG4	1
COG8	1
COL27A1	1
COL4A3BP	1
COL6A6	1
COMMD3	1
COPS3	1
COPS7A	1
COPS7B	1
COQ6	1
CORO7	1
COX15	1
CPAMD8	1
CPD	1
CPEB1	1
CPED1	1
CPNE6	1
CPSF3L	1
CRAT	1
CRIM1	1
CRK	1
CRLS1	1
CRNKL1	1
CROCC	1
CSF3	1
CSPG4	1
CSRNP2	1
CTB-50L17.14	1
CTC1	1
CTD-2192J16.20	1
CTD-2368P22.1	1
CTD-2510F5.6	1
CTD-2587H24.4	1
CTD-3088G3.8	1
CTIF	1
CTLA4	1
CTNND2	1
CTRC	1
CTSD	1
CTTNBP2	1
CTTNBP2NL	1
CUL5	1
CUL7	1
CUL9	1
CXADR	1
CXCL9	1
CXCR1	1
CYB561D1	1
CYB5R4	1
CYFIP2	1
CYLD	1
CYTH2	1
DAAM1	1
DAAM2	1
DACT3	1
DAGLA	1
DAPK1	1
DBNL	1
DCAF10	1
DCAF11	1
DCAF4	1
DCHS1	1
DCST2	1
DCTD	1
DCTN1	1
DCTN2	1
DCTN6	1
DDR1	1
DDX25	1
DDX49	1
DGCR2	1
DGCR6	1
DGCR6L	1
DGKA	1
DGKD	1
DGKE	1
DGKQ	1
DGKZ	1
DHTKD1	1
DHX30	1
DIAPH1	1
DIAPH2	1
DIRAS1	1
DIS3	1
DKFZP761K2322	1
DLG5	1
DMGDH	1
DNAH11	1
DNAH2	1
DNAJA4	1
DNAJB2	1
DNAJB5	1
DNAJC1	1
DNHD1	1
DNPEP	1
DOCK1	1
DOCK2	1
DOLPP1	1
DPF1	1
DPH2	1
DRC1	1
DROSHA	1
DUSP11	1
DUSP16	1
DUSP28	1
DUSP6	1
DUSP7	1
DYNC1LI1	1
E2F2	1
ECE1	1
EDARADD	1
EEF1D	1
EFCAB3	1
EFNB1	1
EHMT2	1
EI24	1
EIF2A	1
EIF2AK2	1
EIF3D	1
EIF4G1	1
ELF4	1
ELFN2	1
ELOVL6	1
EMC3	1
EME1	1
EMILIN2	1
ENDOD1	1
ENKD1	1
EPN3	1
EPS8	1
EPS8L2	1
EPT1	1
ERBB2	1
ERP29	1
ERVW-1	1
ESR2	1
ESRRB	1
ESYT1	1
EVC2	1
EVL	1
EVPLL	1
EXOC3L4	1
EXTL1	1
EYA2	1
EZR	1
F11R	1
FADS3	1
FAM117A	1
FAM134A	1
FAM134C	1
FAM135B	1
FAM160A1	1
FAM174B	1
FAM186B	1
FAM193A	1
FAM211A	1
FAM219A	1
FAM219B	1
FAM26E	1
FAM53A	1
FAM53B	1
FAM63B	1
FAM65B	1
FAM73B	1
FAM83G	1
FAM83H	1
FAN1	1
FANCG	1
FANCL	1
FARSA	1
FBF1	1
FBXL14	1
FBXO32	1
FBXO40	1
FBXW2	1
FCGRT	1
FCHSD1	1
FCRL4	1
FDFT1	1
FDXR	1
FGF7	1
FKBP6	1
FLJ00418	1
FLNA	1
FLNB	1
FLYWCH1	1
FN3KRP	1
FOLH1	1
FOS	1
FOXA1	1
FOXD4L3	1
FOXD4L6	1
FOXI1	1
FOXJ3	1
FOXP4	1
FRMD4B	1
FSTL1	1
FYCO1	1
FYTTD1	1
GABPB2	1
GALNT16	1
GALNT6	1
GANAB	1
GART	1
GAS2	1
GAS8	1
GDF11	1
GDI2	1
GDPD5	1
GEMIN6	1
GGA3	1
GGCX	1
GIPR	1
GJC2	1
GLI2	1
GLIS2	1
GLRX	1
GMEB1	1
GMIP	1
GMPPB	1
GNA12	1
GNB1	1
GNL3	1
GNPNAT1	1
GORASP2	1
GPATCH1	1
GPATCH4	1
GPR63	1
GPR82	1
GPRASP2	1
GPRIN2	1
GPS1	1
GREB1L	1
GRHL3	1
GRIN2A	1
GRIN3A	1
GSR	1
GSTM4	1
GSTM5	1
GSTT1	1
GTPBP4	1
HAP1	1
HAT1	1
HAUS8	1
HCK	1
HDGFRP3	1
HEG1	1
HEPH	1
HERC2	1
HEXA	1
HEXDC	1
HHIPL1	1
HIP1R	1
HIST1H2BJ	1
HIVEP3	1
HMBS	1
HMCN1	1
HMGN1	1
HMGN2	1
HMHA1	1
HNRNPC	1
HNRNPM	1
HOMER2	1
HOOK3	1
HOXB5	1
HS3ST2	1
HSD11B1L	1
HSF5	1
HTR6	1
HTRA4	1
HTT	1
HYDIN	1
HYOU1	1
IBA57	1
IBTK	1
ICOS	1
IFFO1	1
IFFO2	1
IFT122	1
IFT172	1
IGF1R	1
IGFL3	1
IGFLR1	1
IKBKB	1
IKBKG	1
IKZF3	1
IL11RA	1
IL17RE	1
IL1RL2	1
IL20RB	1
IL21R	1
ILF3	1
IMPG2	1
INMT-FAM188B	1
INO80D	1
IPO9	1
IREB2	1
IRF6	1
IRF7	1
IRGQ	1
IST1	1
ISX	1
ISY1-RAB43	1
ITFG2	1
ITGA10	1
ITGA8	1
ITGB2	1
ITPRIP	1
ITSN1	1
IVL	1
IZUMO4	1
JAG1	1
JAKMIP3	1
KANSL3	1
KARS	1
KAT2A	1
KAZN	1
KBTBD11	1
KBTBD13	1
KCND1	1
KCNE4	1
KCNH5	1
KCNH6	1
KCNJ8	1
KDM3A	1
KIAA0087	1
KIAA0226L	1
KIAA0368	1
KIAA0556	1
KIAA0930	1
KIAA1191	1
KIAA1199	1
KIAA1217	1
KIAA1324	1
KIAA1407	1
KIAA1432	1
KIAA1462	1
KIAA1614	1
KIAA1644	1
KIAA1755	1
KIAA2018	1
KIF5A	1
KIF6	1
KLC4	1
KLF13	1
KLHDC7A	1
KLHL3	1
KLHL9	1
KLRG2	1
KNDC1	1
KNOP1	1
KRT4	1
KRT40	1
KRT72	1
KY	1
L3MBTL2	1
LAIR1	1
LAMC1	1
LAMC2	1
LARP7	1
LASP1	1
LDLRAD2	1
LENG8	1
LETM1	1
LGALS3BP	1
LGR6	1
LIG1	1
LIMK1	1
LINC00923	1
LINC00999	1
LLGL1	1
LMAN1	1
LMNB2	1
LMOD1	1
LOH12CR2	1
LONP1	1
LRCH1	1
LRRC46	1
LRRC55	1
LRRC59	1
LRRC69	1
LRRD1	1
LRRK1	1
LUZP1	1
LYPLA2	1
LYRM4	1
LZTR1	1
LZTS3	1
MAF1	1
MAG	1
MAGED2	1
MAGED4B	1
MAN2C1	1
MAP3K10	1
MAP3K12	1
MAP3K2	1
MAP3K9	1
MAP4K2	1
MAP4K4	1
MAP4K5	1
MAP7D3	1
MAPK3	1
MAPKBP1	1
MARCKS	1
MARK2	1
MARK4	1
MARS	1
MAST3	1
MAT2A	1
MB21D2	1
MBD1	1
MCC	1
MCIDAS	1
MCM8	1
MCRS1	1
MDGA2	1
MDM1	1
MDN1	1
MECP2	1
MED13	1
MED22	1
MEF2A	1
MEF2BNB-MEF2B	1
MEGF9	1
MEP1B	1
METTL1	1
METTL21B	1
MFF	1
MFN1	1
MFN2	1
MFSD2A	1
MICALL2	1
MIEF1	1
MINK1	1
MKRN1	1
MLLT10	1
MMGT1	1
MOCS1	1
MOGS	1
MPI	1
MRC2	1
MRO	1
MRPS17	1
MSH5	1
MSL3	1
MSTO1	1
MTFP1	1
MTFR1L	1
MTHFR	1
MTR	1
MTX1	1
MUC19	1
MUM1	1
MYH1	1
MYH11	1
MYH13	1
MYH14	1
MYH15	1
MYH3	1
MYH6	1
MYH7	1
MYH9	1
MYLK	1
MYO18A	1
MYO18B	1
MYO19	1
MYO1G	1
MYRIP	1
MYSM1	1
NAA35	1
NAGK	1
NAGLU	1
NARF	1
NARFL	1
NASP	1
NAT10	1
NBPF6	1
NCALD	1
NCBP2	1
NCKAP1L	1
NDUFB5	1
NEDD9	1
NEK9	1
NELFA	1
NEURL1B	1
NFASC	1
NFATC2	1
NFE2L2	1
NGB	1
NGDN	1
NKIRAS2	1
NKX2-5	1
NLRC5	1
NLRP1	1
NOL9	1
NOX5	1
NPAS4	1
NPEPPS	1
NPHP4	1
NPLOC4	1
NPR3	1
NPRL2	1
NQO1	1
NR1D1	1
NR3C2	1
NRDE2	1
NSUN4	1
NTN1	1
NUAK1	1
NUBP2	1
NUMA1	1
NUP155	1
NUP85	1
NUTM2G	1
NWD1	1
NXF1	1
NXPE3	1
OASL	1
OBSL1	1
OGFOD2	1
OLA1	1
OLFM3	1
OLFML2A	1
OPHN1	1
OSBPL7	1
OSCAR	1
OSMR	1
OSTM1	1
OTOP3	1
OTX2	1
OXNAD1	1
OXSR1	1
P2RX4	1
P2RX6	1
P2RY6	1
PACRG	1
PACSIN1	1
PAPOLB	1
PARP3	1
PARP8	1
PARP9	1
PBX4	1
PCDH12	1
PCDH20	1
PCNT	1
PCSK5	1
PDF	1
PDGFRA	1
PDGFRB	1
PDPN	1
PDZD2	1
PDZD9	1
PELP1	1
PFKL	1
PFKM	1
PGAP2	1
PGAP3	1
PHF13	1
PHF8	1
PHIP	1
PHYHIP	1
PIEZO1	1
PIGL	1
PIGN	1
PIGZ	1
PIK3C2B	1
PIK3CD	1
PIK3R5	1
PIP4K2B	1
PIRT	1
PKD2L1	1
PKD2L2	1
PKDCC	1
PKM	1
PLCB1	1
PLCB2	1
PLCXD2	1
PLD2	1
PLEC	1
PLEKHA5	1
PLEKHG4	1
PLEKHM1	1
PLS3	1
PLXNA2	1
PLXNB1	1
PLXND1	1
PMFBP1	1
PMPCA	1
PNKP	1
PNMA3	1
POGZ	1
POLD4	1
POLDIP3	1
[truncated: 1,467 more rows]
