# Supplementary material for: A Biomarker Panel of Radiation-Upregulated miRNA as Signature for Ionizing Radiation Exposure
Source: Life (Basel). 2020 Dec 18;10(12):361. doi: 10.3390/life10120361 (PMC7766228; doi:10.3390/life10120361)
Supplement: Supplementary file 1 [file life-10-00361-s001.zip › Table S5.xlsx]

## Sheet: Sheet1
Table S5. Enriched pathways of 396 target gene of differentially expressed miRNA. Pathways in blue and red are related to signal transduction and cancer, respectively.
Annotation Cluster 1	Enrichment Score: 0.9213840983256735
Category	Term	Count	%	PValue	Genes	List Total	Pop Hits	Pop Total	Fold Enrichment	Bonferroni	Benjamini	FDR
KEGG_PATHWAY	hsa04070:Phosphatidylinositol signaling system	6	1.5625	0.0365057	PPIP5K2, PTEN, PLCG2, PIK3CB, DGKI, DGKH	130	98	6879	3.23972	0.999291	1	1
KEGG_PATHWAY	hsa05214:Glioma	4	1.04167	0.122167	PTEN, PLCG2, PIK3CB, SOS1	130	65	6879	3.25633	1	1	1
KEGG_PATHWAY	hsa00562:Inositol phosphate metabolism	3	0.78125	0.385951	PTEN, PLCG2, PIK3CB	130	71	6879	2.23586	1	1	1
Annotation Cluster 2	Enrichment Score: 0.7535859756296853
Category	Term	Count	%	PValue	Genes	List Total	Pop Hits	Pop Total	Fold Enrichment	Bonferroni	Benjamini	FDR
KEGG_PATHWAY	hsa04022:cGMP-PKG signaling pathway	8	2.08333	0.0286299	GUCY1A3, PPP1CB, MEF2C, GNAQ, GATA4, ATP2B1, SLC8A1, CREB5	130	158	6879	2.67926	0.996532	1	1
KEGG_PATHWAY	hsa04611:Platelet activation	6	1.5625	0.0968326	GUCY1A3, PPP1CB, COL24A1, GNAQ, PLCG2, PIK3CB	130	130	6879	2.44225	1	1	1
KEGG_PATHWAY	hsa04921:Oxytocin signaling pathway	4	1.04167	0.537547	GUCY1A3, PPP1CB, MEF2C, GNAQ	130	150	6879	1.41108	1	1	1
KEGG_PATHWAY	hsa04270:Vascular smooth muscle contraction	3	0.78125	0.64923	GUCY1A3, PPP1CB, GNAQ	130	117	6879	1.3568	1	1	1
Annotation Cluster 3	Enrichment Score: 0.7514139332303282
Category	Term	Count	%	PValue	Genes	List Total	Pop Hits	Pop Total	Fold Enrichment	Bonferroni	Benjamini	FDR
KEGG_PATHWAY	hsa04662:B cell receptor signaling pathway	5	1.30208	0.0400544	PLCG2, PIK3CB, SOS1, CD22, MALT1	130	69	6879	3.83445	0.999655	1	1
KEGG_PATHWAY	hsa04722:Neurotrophin signaling pathway	6	1.5625	0.0744454	NTRK2, MAP3K1, KIDINS220, PLCG2, PIK3CB, SOS1	130	120	6879	2.64577	1	1	1
KEGG_PATHWAY	hsa04012:ErbB signaling pathway	5	1.30208	0.0801282	ERBB4, PLCG2, NRG1, PIK3CB, SOS1	130	87	6879	3.04111	1	1	1
KEGG_PATHWAY	hsa05214:Glioma	4	1.04167	0.122167	PTEN, PLCG2, PIK3CB, SOS1	130	65	6879	3.25633	1	1	1
KEGG_PATHWAY	hsa05223:Non-small cell lung cancer	3	0.78125	0.282894	PLCG2, PIK3CB, SOS1	130	56	6879	2.83475	1	1	1
KEGG_PATHWAY	hsa04664:Fc epsilon RI signaling pathway	3	0.78125	0.365742	PLCG2, PIK3CB, SOS1	130	68	6879	2.3345	1	1	1
KEGG_PATHWAY	hsa04650:Natural killer cell mediated cytotoxicity	4	1.04167	0.402095	SH3BP2, PLCG2, PIK3CB, SOS1	130	122	6879	1.73493	1	1	1
KEGG_PATHWAY	hsa04014:Ras signaling pathway	4	1.04167	0.802294	PLCG2, PIK3CB, SOS1, GRIN2B	130	226	6879	0.936555	1	1	1
Annotation Cluster 4	Enrichment Score: 0.6141644747940544
Category	Term	Count	%	PValue	Genes	List Total	Pop Hits	Pop Total	Fold Enrichment	Bonferroni	Benjamini	FDR
KEGG_PATHWAY	hsa05213:Endometrial cancer	4	1.04167	0.0733296	PTEN, CTNNA3, PIK3CB, SOS1	130	52	6879	4.07041	1	1	1
KEGG_PATHWAY	hsa05215:Prostate cancer	5	1.30208	0.082783	AR, PTEN, PIK3CB, SOS1, CREB5	130	88	6879	3.00656	1	1	1
KEGG_PATHWAY	hsa05214:Glioma	4	1.04167	0.122167	PTEN, PLCG2, PIK3CB, SOS1	130	65	6879	3.25633	1	1	1
KEGG_PATHWAY	hsa05200:Pathways in cancer	11	2.86458	0.201651	AR, GNAQ, PTCH1, HHIP, PTEN, PLCG2, CCDC6, XIAP, CTNNA3, PIK3CB, SOS1	130	393	6879	1.48109	1	1	1
KEGG_PATHWAY	hsa04931:Insulin resistance	4	1.04167	0.330236	PPP1CB, PTEN, PIK3CB, CREB5	130	108	6879	1.95983	1	1	1
KEGG_PATHWAY	hsa04510:Focal adhesion	6	1.5625	0.343687	PPP1CB, COL24A1, PTEN, XIAP, PIK3CB, SOS1	130	206	6879	1.54122	1	1	1
KEGG_PATHWAY	hsa04151:PI3K-Akt signaling pathway	8	2.08333	0.471239	COL24A1, PPP2R3C, PTEN, BRCA1, PIK3CB, SOS1, PRLR, CREB5	130	345	6879	1.22702	1	1	1
KEGG_PATHWAY	hsa05161:Hepatitis B	4	1.04167	0.514551	MAP3K1, PTEN, PIK3CB, CREB5	130	145	6879	1.45973	1	1	1
KEGG_PATHWAY	hsa04068:FoxO signaling pathway	3	0.78125	0.721252	PTEN, PIK3CB, SOS1	130	134	6879	1.18467	1	1	1
Annotation Cluster 5	Enrichment Score: 0.49472722288544163
Category	Term	Count	%	PValue	Genes	List Total	Pop Hits	Pop Total	Fold Enrichment	Bonferroni	Benjamini	FDR
KEGG_PATHWAY	hsa04728:Dopaminergic synapse	5	1.30208	0.218917	PPP1CB, PPP2R3C, GNAQ, GRIN2B, CREB5	130	128	6879	2.06701	1	1	1
KEGG_PATHWAY	hsa05031:Amphetamine addiction	3	0.78125	0.352131	PPP1CB, GRIN2B, CREB5	130	66	6879	2.40524	1	1	1
KEGG_PATHWAY	hsa05034:Alcoholism	5	1.30208	0.425437	PPP1CB, NTRK2, SOS1, GRIN2B, CREB5	130	177	6879	1.49478	1	1	1
Annotation Cluster 6	Enrichment Score: 0.4787508151722826
Category	Term	Count	%	PValue	Genes	List Total	Pop Hits	Pop Total	Fold Enrichment	Bonferroni	Benjamini	FDR
KEGG_PATHWAY	hsa04917:Prolactin signaling pathway	4	1.04167	0.147851	PIK3CB, SOS1, PRLR, SOCS4	130	71	6879	2.98115	1	1	1
KEGG_PATHWAY	hsa04910:Insulin signaling pathway	4	1.04167	0.481389	PPP1CB, PIK3CB, SOS1, SOCS4	130	138	6879	1.53378	1	1	1
KEGG_PATHWAY	hsa04630:Jak-STAT signaling pathway	4	1.04167	0.514551	PIK3CB, SOS1, PRLR, SOCS4	130	145	6879	1.45973	1	1	1
Annotation Cluster 7	Enrichment Score: 0.34465364230287227
Category	Term	Count	%	PValue	Genes	List Total	Pop Hits	Pop Total	Fold Enrichment	Bonferroni	Benjamini	FDR
KEGG_PATHWAY	hsa04510:Focal adhesion	6	1.5625	0.343687	PPP1CB, COL24A1, PTEN, XIAP, PIK3CB, SOS1	130	206	6879	1.54122	1	1	1
KEGG_PATHWAY	hsa04910:Insulin signaling pathway	4	1.04167	0.481389	PPP1CB, PIK3CB, SOS1, SOCS4	130	138	6879	1.53378	1	1	1
KEGG_PATHWAY	hsa04810:Regulation of actin cytoskeleton	5	1.30208	0.558959	PPP1CB, NCKAP1, ABI2, PIK3CB, SOS1	130	210	6879	1.25989	1	1	1
