# Supplementary figures and images for: A Biomarker Panel of Radiation-Upregulated miRNA as Signature for Ionizing Radiation Exposure
Source: MDPI journal article supplement (doi:10.3390/life10120361), 2020-12-18

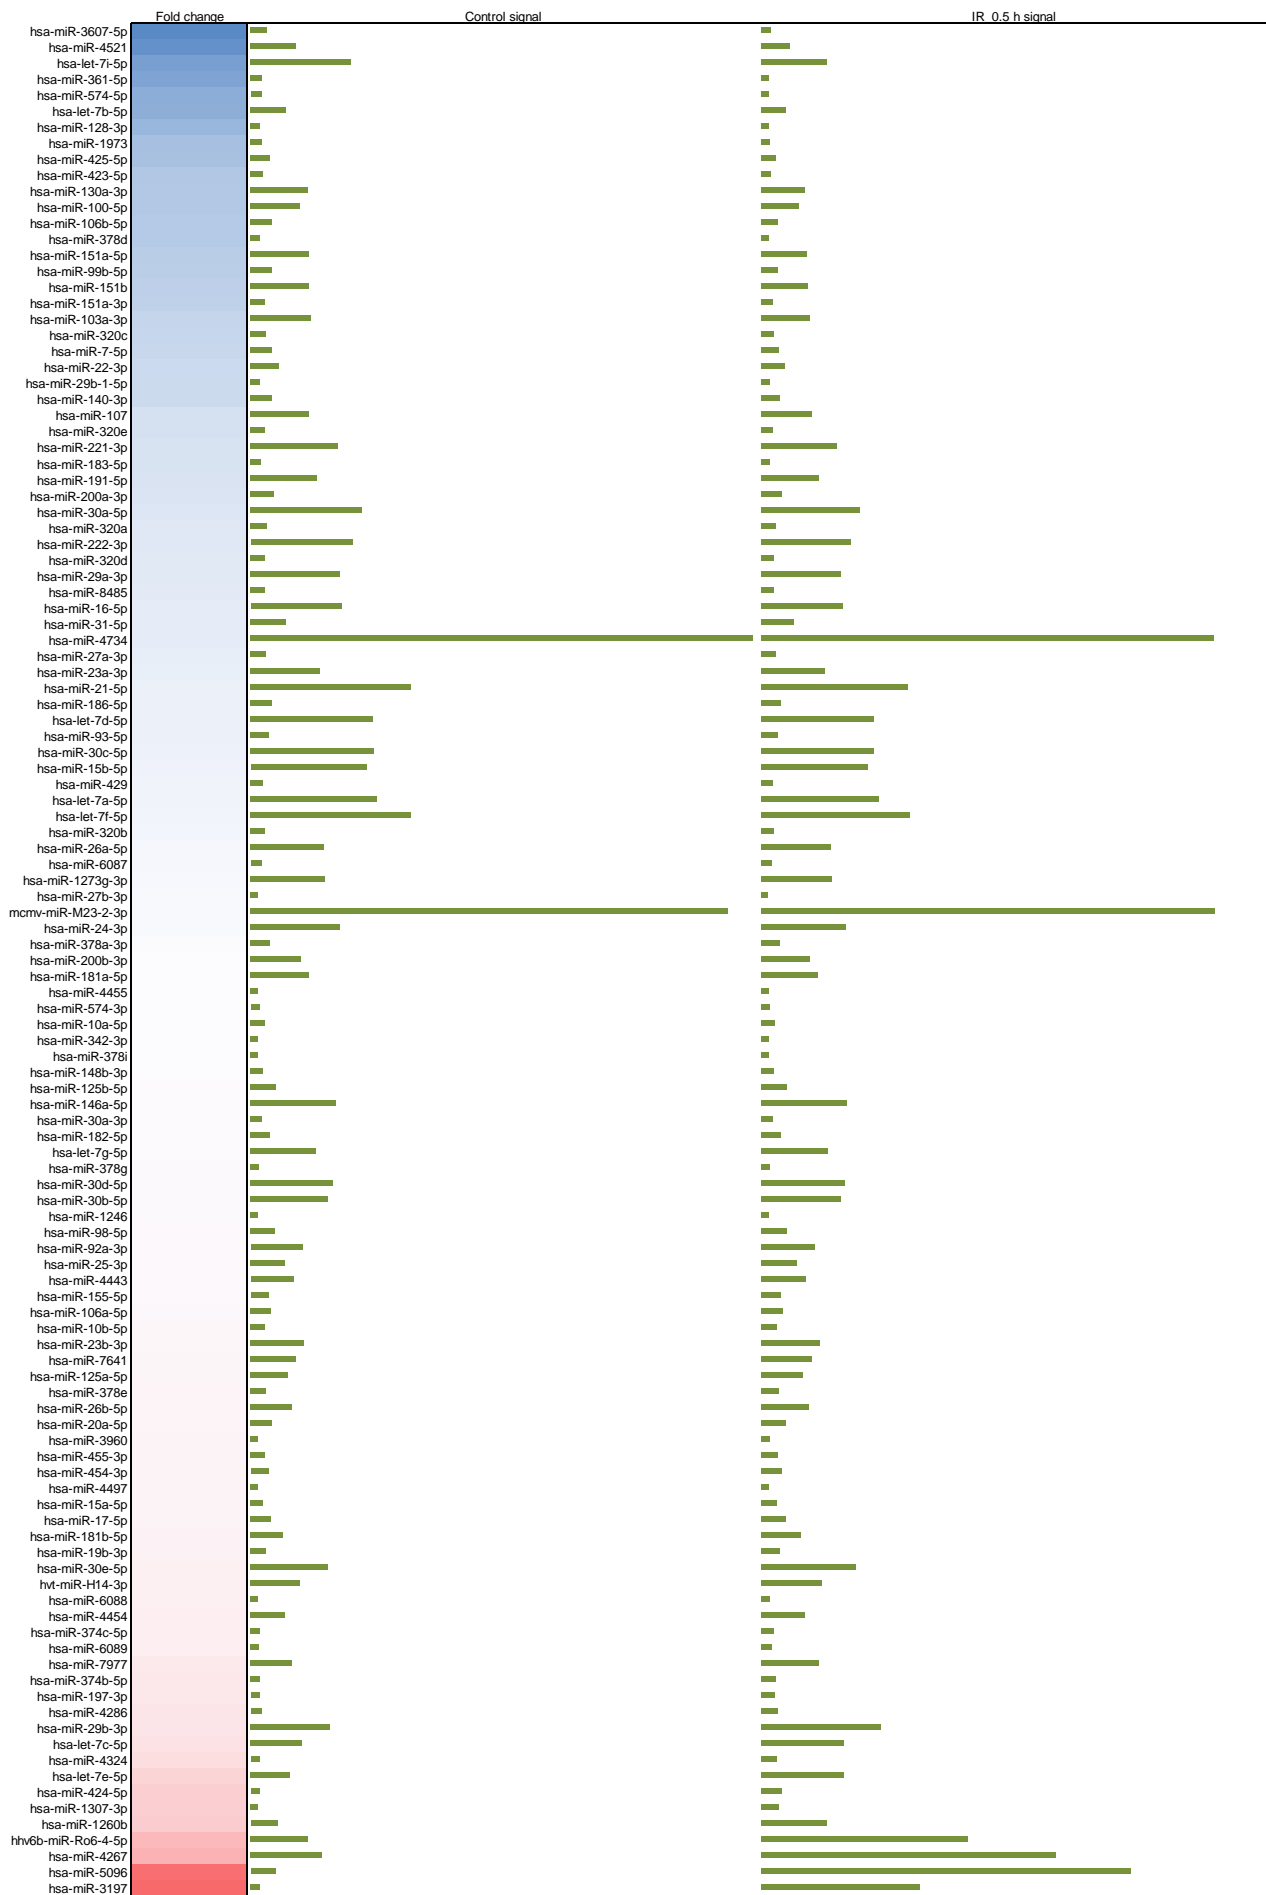

Supplement: s1 [file s1]

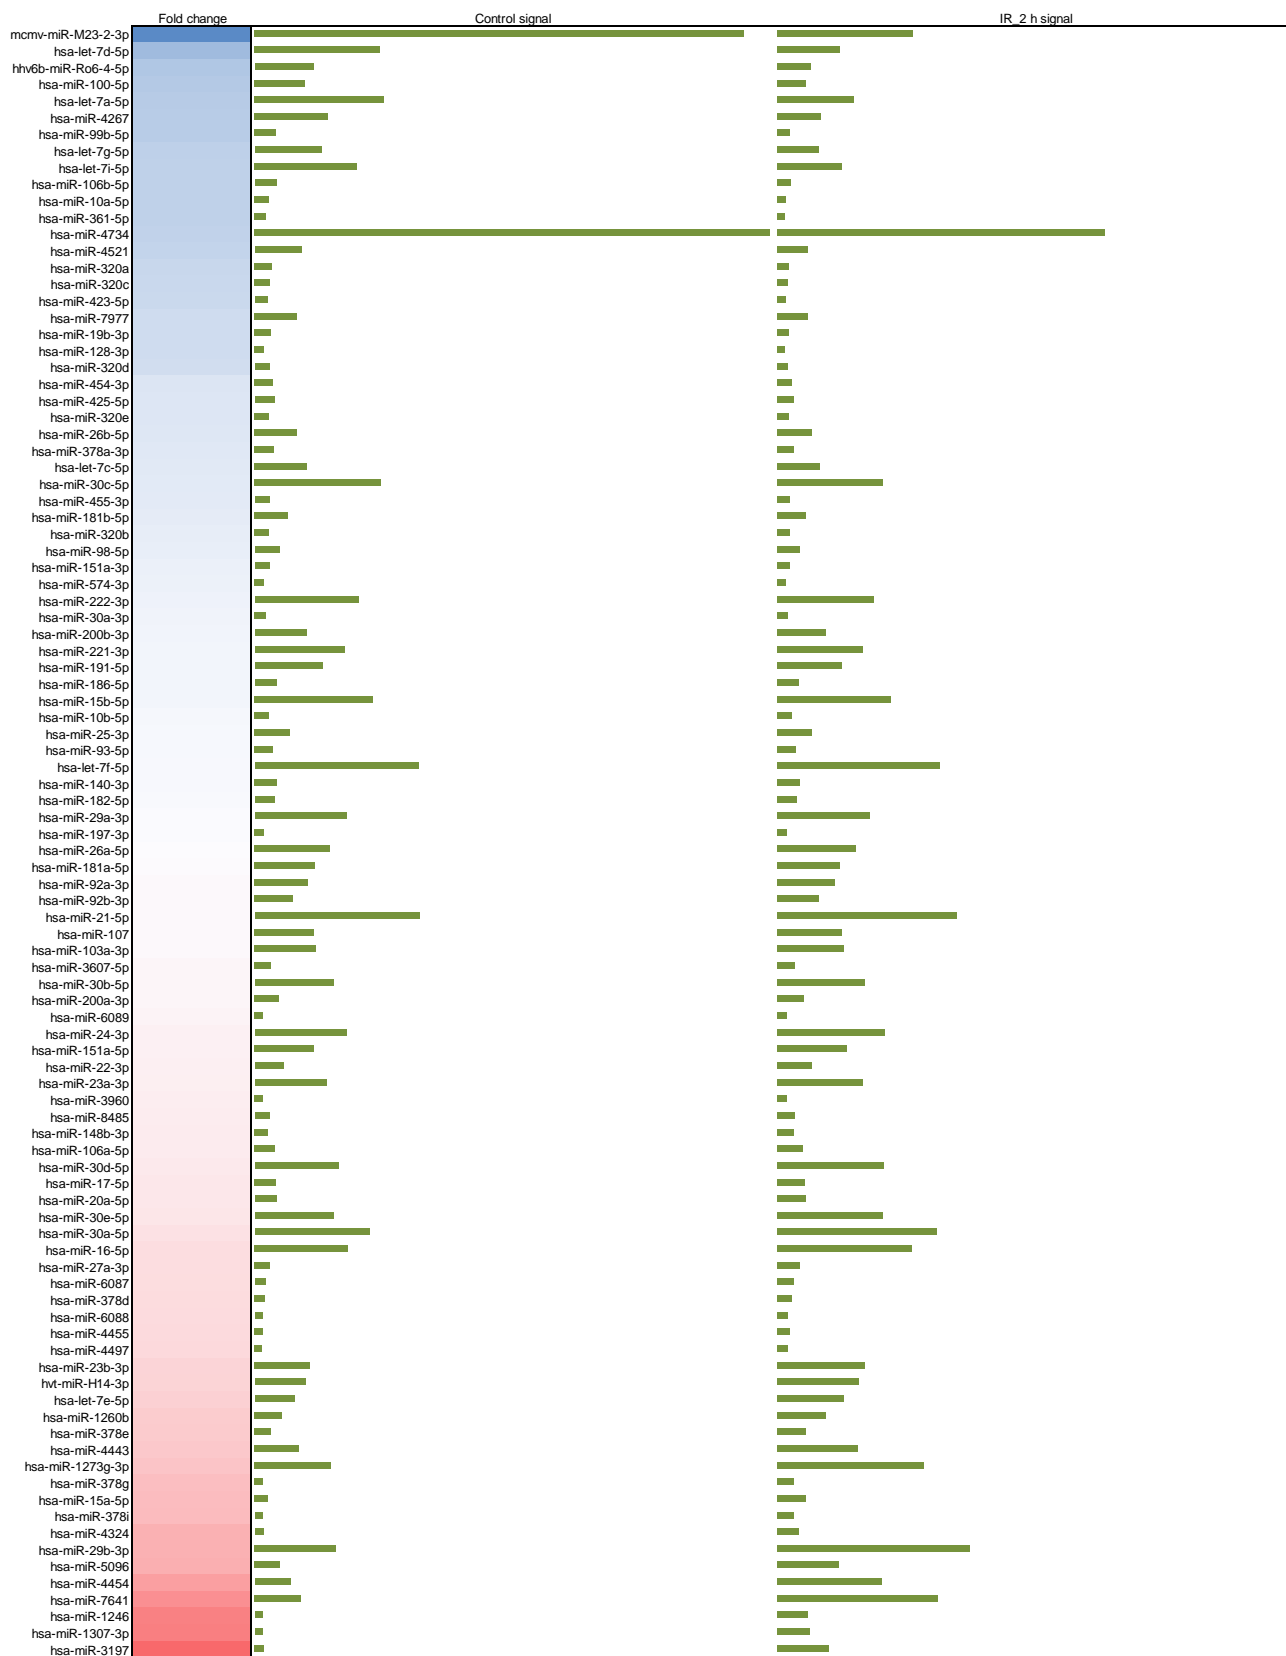

Supplement: s1 [file s1]

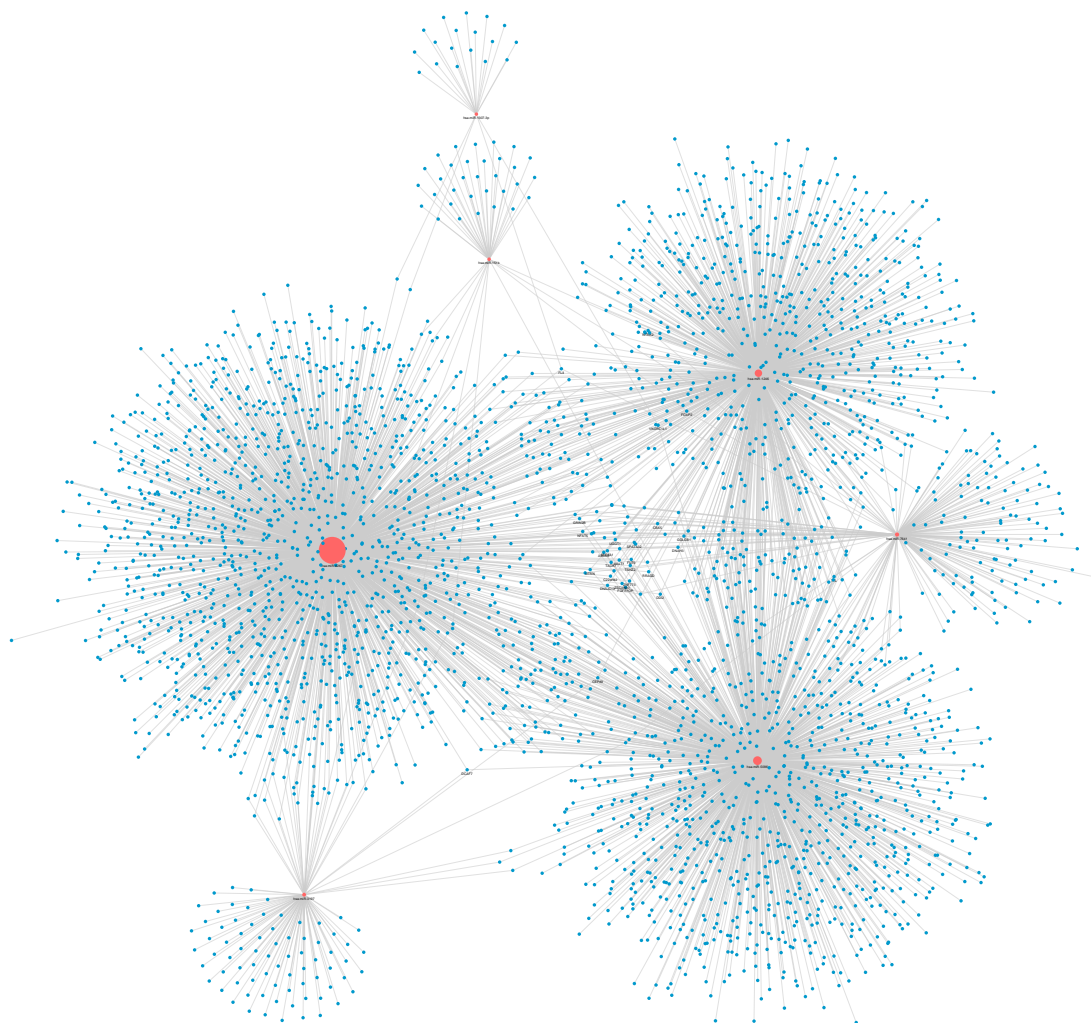

Supplement: s1 [file s1]
